# Supplementary material for: Sesquiterpene glycosides from the roots of Codonopsis pilosula
Source: PubMed Central journal article supplement — Acta Pharm Sin B. 2015 Nov 10;6(1):46–54. doi: 10.1016/j.apsb.2015.09.007 (PMC4724660; doi:10.1016/j.apsb.2015.09.007), 2015-11-10
Supplement: mmc1.pdf [file mmc1.pdf]

# Three new sesquiterpene glycosides from the roots of *Codonopsis pilosula*

Yueping Jiang<sup>a,b</sup>, Yufeng Liu<sup>a</sup>, Qinglan Guo<sup>a</sup>, Chengbo Xu<sup>a</sup>, Chenggen Zhu<sup>a</sup>, and Jiangong Shi<sup>a\*</sup>

<sup>a</sup> *State Key Laboratory of Bioactive Substance and Function of Natural Medicines, Institute of Materia Medica, Chinese Academy of Medical Sciences and Peking Union Medical College, Beijing 100050, China*

<sup>b</sup> *Department of Pharmacy, Xiangya Hospital, Central South University, Changsha, 410008, China*

## Supporting Information

---

\*Corresponding author. E-mail: shijg@imm.ac.cn.

| No. | Content                                                                                                                                                                                                   | Page |
|-----|-----------------------------------------------------------------------------------------------------------------------------------------------------------------------------------------------------------|------|
| 1   | <b>Detailed ECD Calculation of 1–3, their aglycones, the model compounds, and (–)-<math>\alpha</math>-barbatenal-reduction product</b>                                                                    | S4   |
| 2   | <b>Figure S1.</b> The re-optimized conformer of <b>1</b> .                                                                                                                                                | S4   |
| 3   | <b>Figure S2.</b> The re-optimized fourteen conformers of the aglycone of <b>1</b> and their equilibrium populations.                                                                                     | S5   |
| 4   | <b>Figure S3.</b> The re-optimized sixteen conformers of the <b>model</b> of <b>1</b> and their equilibrium populations.                                                                                  | S6   |
| 5   | <b>Figure S4.</b> The experimental CD spectrum of <b>1</b> (black) and the calculated ECD spectra of <b>1</b> (dash dotted red), its aglycone (dashed green), and the <b>model</b> (dotted blue) in MeOH. | S7   |
| 6   | <b>Figure S5.</b> The re-optimized conformer of <b>2</b> .                                                                                                                                                | S7   |
| 7   | <b>Figure S6.</b> The re-optimized five conformers of the aglycone of <b>2</b> and their equilibrium populations.                                                                                         | S7   |
| 8   | <b>Figure S7.</b> The re-optimized ten conformers of the <b>model</b> of <b>2</b> and their equilibrium populations.                                                                                      | S8   |
| 9   | <b>Figure S8.</b> The experimental CD spectrum of <b>2</b> (black) and the calculated ECD spectra of <b>2</b> (dash dotted red), its aglycone (dashed green), and the <b>model</b> (dotted blue) in MeOH. | S8   |
| 10  | <b>Figure S9.</b> The optimized conformer of <b>3</b> .                                                                                                                                                   | S9   |
| 11  | <b>Figure S10.</b> The optimized conformer of the aglycone of <b>3</b> .                                                                                                                                  | S9   |
| 12  | <b>Figure S11.</b> The experimental CD (black and blue) and calculated ECD (dash dotted red and dashed green) spectra of <b>3</b> and its aglycone in MeOH.                                               | S9   |
| 13  | <b>Figure S12.</b> The reoptimized six conformers of (–)- $\alpha$ -barbatenal-reduction product                                                                                                          | S9   |
| 14  | <b>Figure S13.</b> The calculated ECD spectrum of (–)- $\alpha$ -barbatenal-reduction product.                                                                                                            | S10  |
| 15  | <b>Figure S12.</b> The HPLC chromatograms of the sugar derivatives, from top to bottom, for D-glucose, L-glucose, D-apiose, L-apiose, and sugars from hydrolysates <b>1</b> and <b>2</b> .                | S10  |
| 16  | <b>Figure S13.</b> The UV spectrum of compound <b>1</b> in MeOH.                                                                                                                                          | S11  |
| 17  | <b>Figure S14.</b> The CD spectrum of compound <b>1</b> in MeOH.                                                                                                                                          | S12  |
| 18  | <b>Figure S15.</b> The IR spectrum of compound <b>1</b> .                                                                                                                                                 | S13  |
| 19  | <b>Figure S16.</b> The ESI mass spectrum of compound <b>1</b> .                                                                                                                                           | S14  |
| 20  | <b>Figure S17.</b> The (+)-HR-ESI-MS report of compound <b>1</b> , page 1.                                                                                                                                | S15  |
| 21  | <b>Figure S18.</b> The (+)-HR-ESI-MS report of compound <b>1</b> , page 2.                                                                                                                                | S16  |
| 22  | <b>Figure S19.</b> The (+)-HR-ESI-MS report of compound <b>1</b> , page 3.                                                                                                                                | S17  |
| 23  | <b>Figure S20.</b> The $^1\text{H}$ NMR spectrum of compound <b>1</b> in DMSO- $d_6$ (600 MHz).                                                                                                           | S18  |
| 24  | <b>Figure S21.</b> The $^{13}\text{C}$ NMR spectrum of compound <b>1</b> in DMSO- $d_6$ (150 MHz).                                                                                                        | S19  |
| 25  | <b>Figure S22.</b> The DEPT spectrum of compound <b>1</b> in DMSO- $d_6$ (150 MHz).                                                                                                                       | S20  |
| 26  | <b>Figure S23.</b> The $^1\text{H}$ - $^1\text{H}$ COSY spectrum of compound <b>1</b> in DMSO- $d_6$ (600 MHz).                                                                                           | S21  |
| 27  | <b>Figure S24.</b> The HSQC spectrum of compound <b>1</b> in DMSO- $d_6$ (600 MHz for $^1\text{H}$ ).                                                                                                     | S22  |
| 28  | <b>Figure S25.</b> The HMBC spectrum of compound <b>1</b> in DMSO- $d_6$ (600 MHz for $^1\text{H}$ ).                                                                                                     | S23  |
| 29  | <b>Figure S26.</b> The NOE difference spectrum of <b>1</b> in DMSO- $d_6$ (600 MHz).                                                                                                                      | S24  |
| 30  | <b>Figure S27.</b> The UV spectrum of compound <b>2</b> in MeOH.                                                                                                                                          | S25  |
| 31  | <b>Figure S28.</b> The CD spectrum of compound <b>2</b> in MeOH.                                                                                                                                          | S26  |
| 32  | <b>Figure S29.</b> The IR spectrum of compound <b>2</b> .                                                                                                                                                 | S27  |
| 33  | <b>Figure S30.</b> The ESI mass spectrum of compound <b>2</b> .                                                                                                                                           | S28  |
| 34  | <b>Figure S31.</b> The (+)-HR-ESI-MS report of compound <b>2</b> , page 1.                                                                                                                                | S29  |
| 35  | <b>Figure S32.</b> The (+)-HR-ESI-MS report of compound <b>2</b> , page 2.                                                                                                                                | S30  |
| 36  | <b>Figure S33.</b> The (+)-HR-ESI-MS report of compound <b>2</b> , page 3.                                                                                                                                | S31  |
| 37  | <b>Figure S34.</b> The $^1\text{H}$ NMR spectrum of compound <b>2</b> in MeOH- $d_4$ (600 MHz).                                                                                                           | S32  |
| 38  | <b>Figure S35.</b> The $^{13}\text{C}$ NMR spectrum of compound <b>2</b> in MeOH- $d_4$ (150MHz).                                                                                                         | S33  |
| 39  | <b>Figure S36.</b> The DEPT spectrum of compound <b>2</b> in MeOH- $d_4$ (150 MHz).                                                                                                                       | S34  |
| 40  | <b>Figure S37.</b> The $^1\text{H}$ - $^1\text{H}$ COSY spectrum of compound <b>2</b> in MeOH- $d_4$ (600 MHz).                                                                                           | S35  |
| 41  | <b>Figure S38.</b> The HSQC spectrum of compound <b>2</b> in MeOH- $d_4$ (600 MHz for $^1\text{H}$ ).                                                                                                     | S36  |

---

|    |                                                                                                                                       |     |
|----|---------------------------------------------------------------------------------------------------------------------------------------|-----|
| 42 | <b>Figure S39.</b> The HMBC spectrum of compound <b>2</b> in MeOH- <i>d</i> <sub>4</sub> (600 MHz for <sup>1</sup> H).                | S37 |
| 43 | <b>Figure S40.</b> The NOE difference spectrum of <b>2</b> in MeOH- <i>d</i> <sub>4</sub> (600 MHz).                                  | S38 |
| 44 | <b>Figure S41.</b> The <sup>1</sup> H NMR spectrum of compound <b>2a</b> in MeOH- <i>d</i> <sub>4</sub> (600 MHz).                    | S39 |
| 45 | <b>Figure S42.</b> The UV spectrum of compound <b>3</b> in MeOH.                                                                      | S40 |
| 46 | <b>Figure S43.</b> The CD spectrum of compound <b>3</b> in MeOH.                                                                      | S41 |
| 47 | <b>Figure S44.</b> The IR spectrum of compound <b>3</b> .                                                                             | S42 |
| 48 | <b>Figure S45.</b> The ESI mass spectrum of compound <b>3</b> .                                                                       | S43 |
| 49 | <b>Figure S46.</b> The (+)-HR-ESI-MS report of compound <b>3</b> , page 1.                                                            | S44 |
| 50 | <b>Figure S47.</b> The (+)-HR-ESI-MS report of compound <b>3</b> , page 2.                                                            | S45 |
| 51 | <b>Figure S48.</b> The (+)-HR-ESI-MS report of compound <b>3</b> , page 3.                                                            | S46 |
| 52 | <b>Figure S49.</b> The <sup>1</sup> H NMR spectra of compound <b>3</b> in acetone- <i>d</i> <sub>6</sub> (600 M).                     | S47 |
| 53 | <b>Figure S50.</b> The <sup>13</sup> C NMR spectra of compound <b>3</b> in acetone- <i>d</i> <sub>6</sub> (150 M).                    | S48 |
| 54 | <b>Figure S51.</b> The DEPT spectra of compound <b>3</b> in acetone- <i>d</i> <sub>6</sub> (150 M).                                   | S49 |
| 55 | <b>Figure S52.</b> The <sup>1</sup> H- <sup>1</sup> HgCOSY spectrum of compound <b>3</b> in acetone- <i>d</i> <sub>6</sub> (600 MHz). | S50 |
| 56 | <b>Figure S53.</b> The gHSQC spectrum of compound <b>3</b> in acetone- <i>d</i> <sub>6</sub> (600 MHz for <sup>1</sup> H).            | S51 |
| 57 | <b>Figure S54.</b> The gHMBC spectrum of compound <b>3</b> in acetone- <i>d</i> <sub>6</sub> (600 MHz for <sup>1</sup> H).            | S52 |
| 58 | <b>Figure S55.</b> The NOE difference spectrum of <b>3</b> in acetone- <i>d</i> <sub>6</sub> (600 MHz).                               | S53 |
| 59 | <b>Figure S56.</b> The <sup>1</sup> H NMR spectra of compound <b>3a</b> in acetone- <i>d</i> <sub>6</sub> (600 M).                    | S54 |
| 60 | <b>Figure S57.</b> The CD spectrum of compound <b>3a</b> in MeOH.                                                                     | S55 |
| 61 | <b>Figure S58.</b> The <sup>1</sup> H NMR spectra of D-glucose hydrolyzed from <b>3</b> in D <sub>2</sub> O (600 M).                  | S56 |
| 62 | <b>Figure S59.</b> The <sup>1</sup> H NMR spectra of the authentic D-glucose in D <sub>2</sub> O (600 M).                             | S57 |

---

**Detailed ECD Calculation of 1–3, their aglycones, the model compounds, and (–)- $\alpha$ -barbatenal-reduction product.** Conformational analysis was performed by using the MMFF94 molecular mechanics force field calculation using the MOE (Molecular Operating Environment) software package.

Conformational analysis showed conformer(s) for **1–3**, their aglycones, the model compounds, and (–)- $\alpha$ -barbatenal-reduction product having relative energy within 2 kcal/mol, which were considered for further DFT calculations. Subsequently, using Gaussian 09 program package, the conformers were re-optimized using DFT at the B3LYP/6-31+G(d) level, and conductor-like polarizable continuum model (CPCM) was adopted to consider solvent effects using the dielectric constant of MeOH ( $\epsilon = 32.6$ ). The B3LYP/6-31G+(d) harmonic vibrational frequencies were calculated to confirm their stability. The energies, oscillator strengths, and rotational strengths of the first 30 electronic excitations of the conformers were calculated using the TDDFT methodology at the B3LYP/6-311++G (2d,2p) level in gas phase, and conformer(s) for **1–3**, the aglycones, the model compounds, and (–)- $\alpha$ -barbatenal-reduction product (Figures S1–S3, S5–S7, S9, S10, and S12) showed relative Gibbs free energies ( $\Delta G$ ) under 2 kcal/mol. The ECD spectra of the conformers were then simulated using the Gaussian function ( $\sigma = 0.28$  eV), respectively. The final spectra of the compounds (Figures S4, S8, and S11) were obtained by averaging the simulated spectra of the lowest energy conformers according to the Boltzmann distribution theory, in which their Gibbs free energy (G) were adopted.

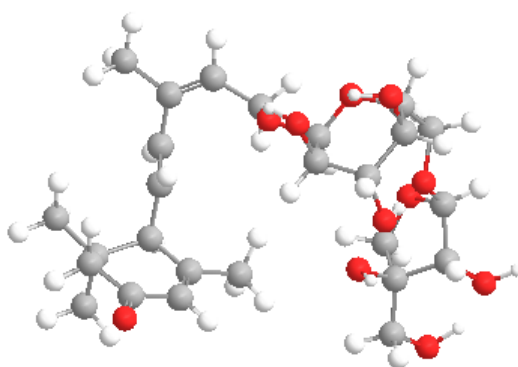

**Figure S1.** The re-optimized conformer of **1**.

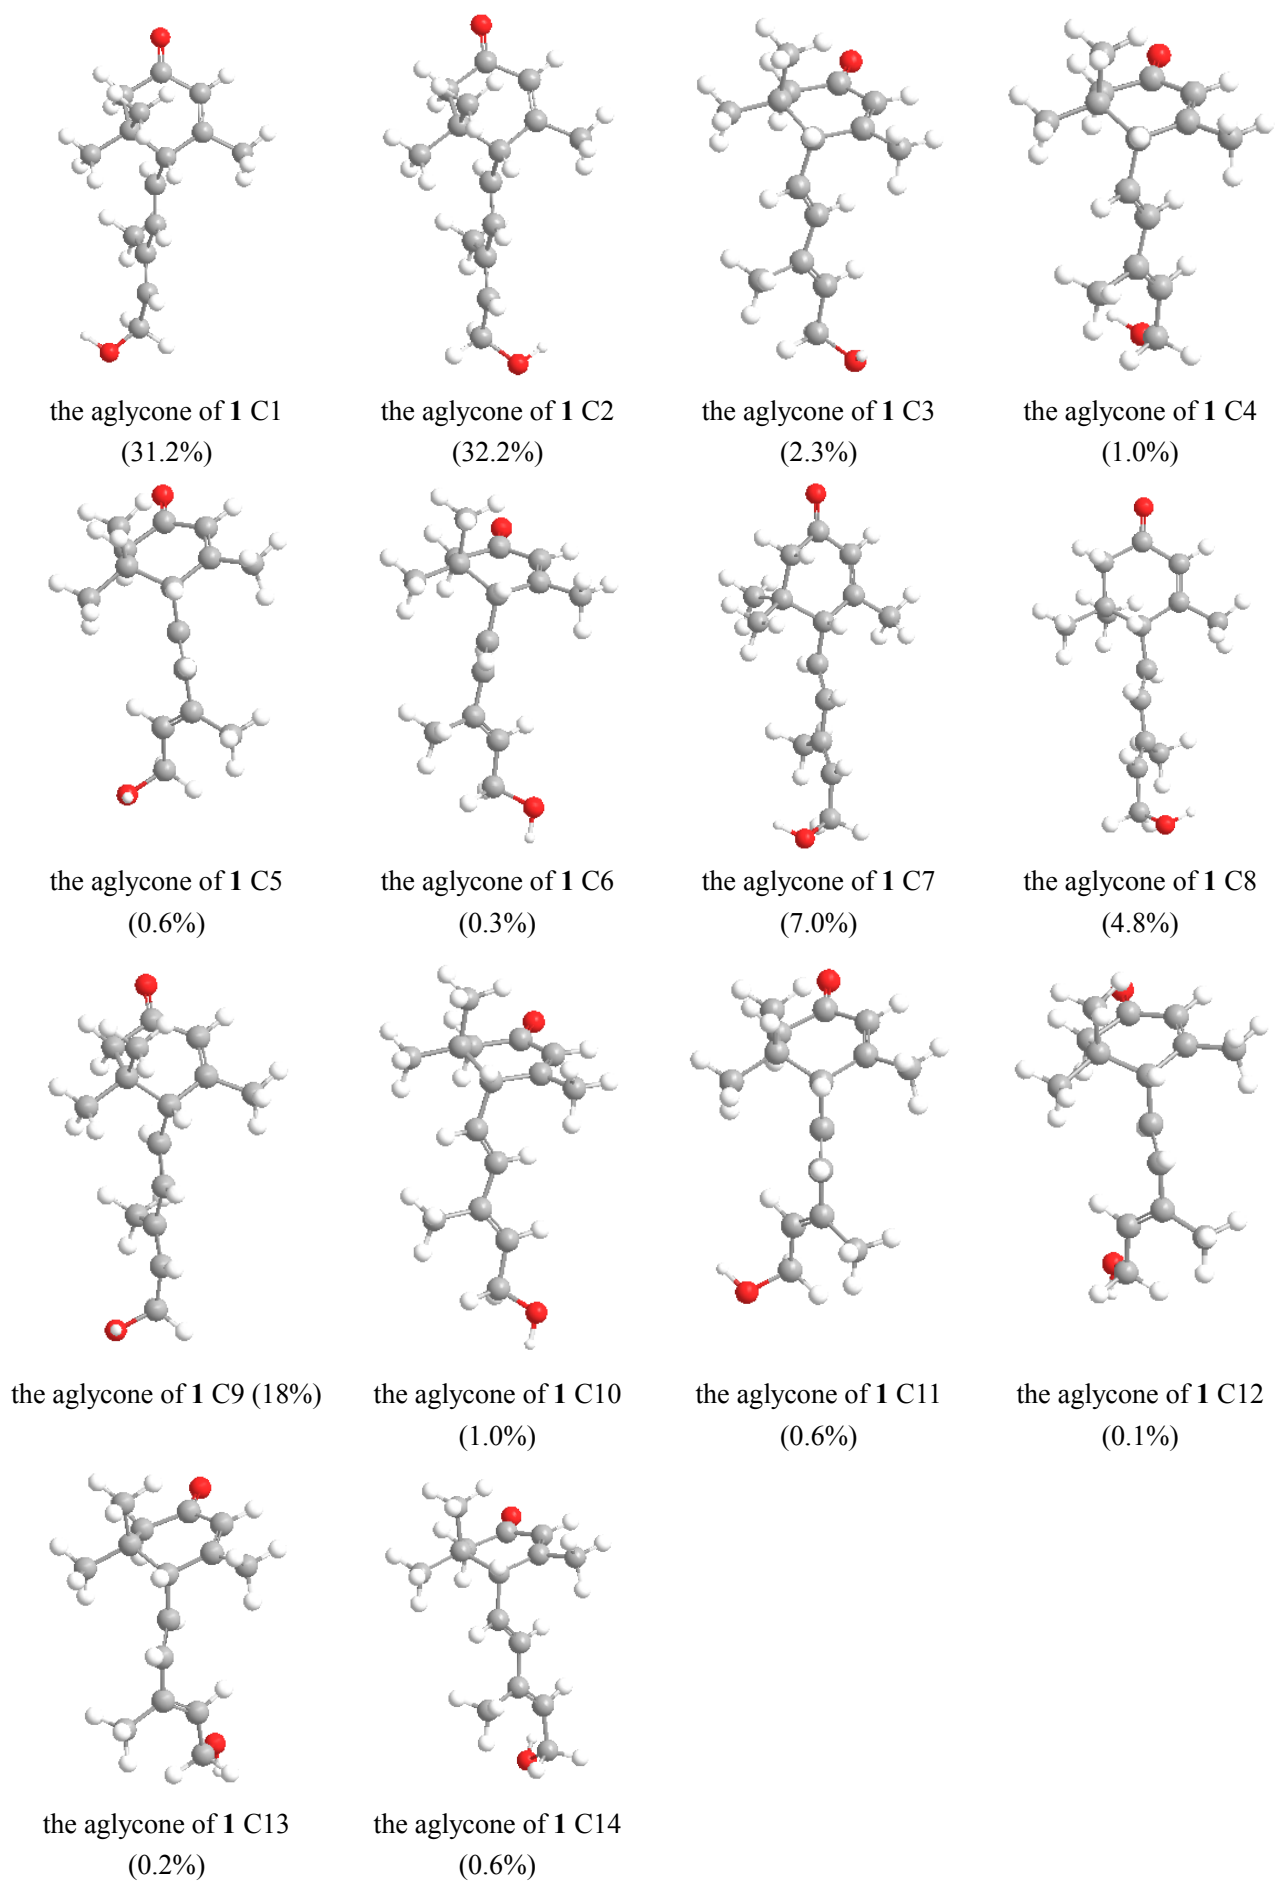

**Figure S2.** The re-optimized fourteen conformers of the aglycone of **1** and their equilibrium populations.

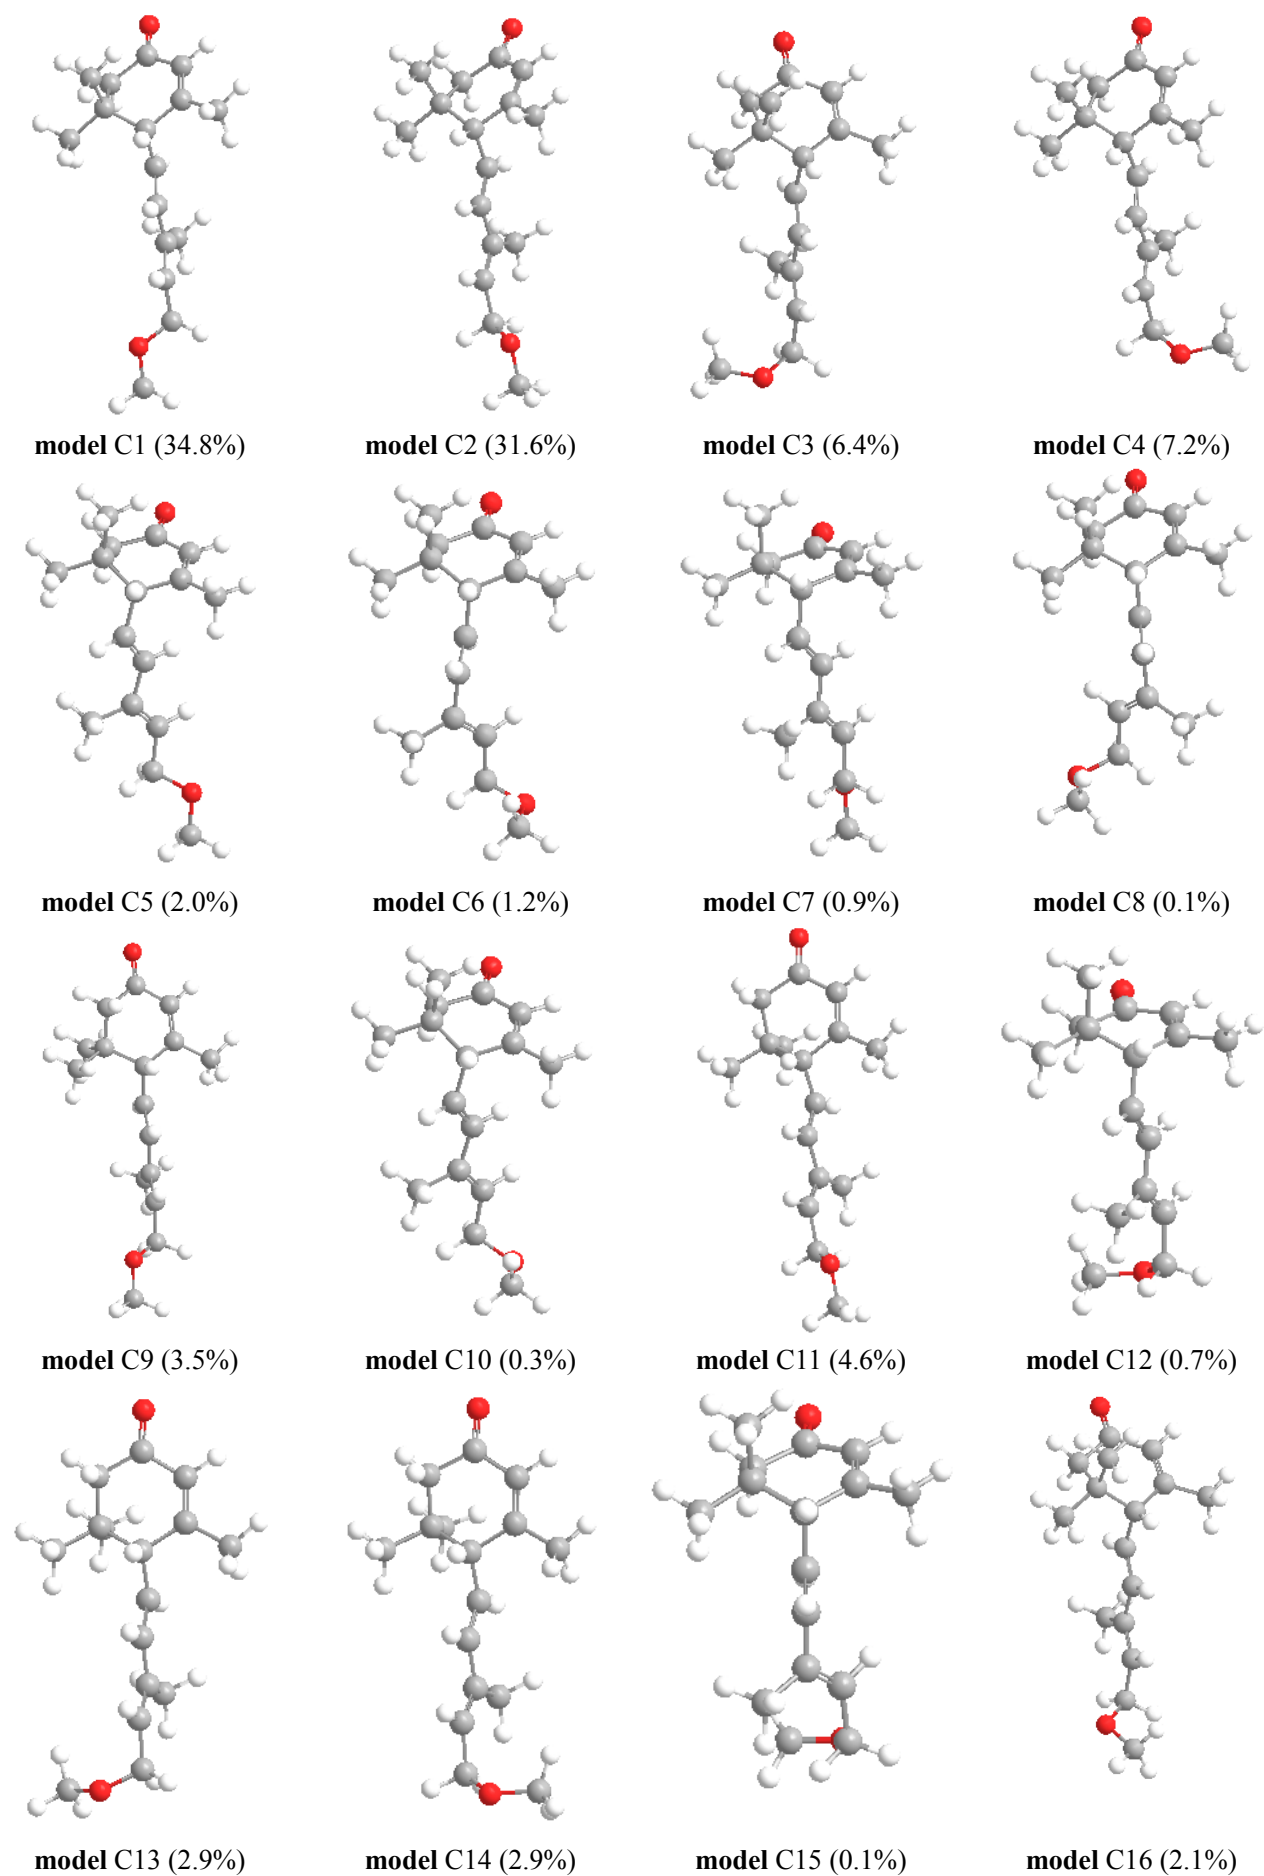

**Figure S3.** The re-optimized sixteen conformers of the **model** and their equilibrium populations.

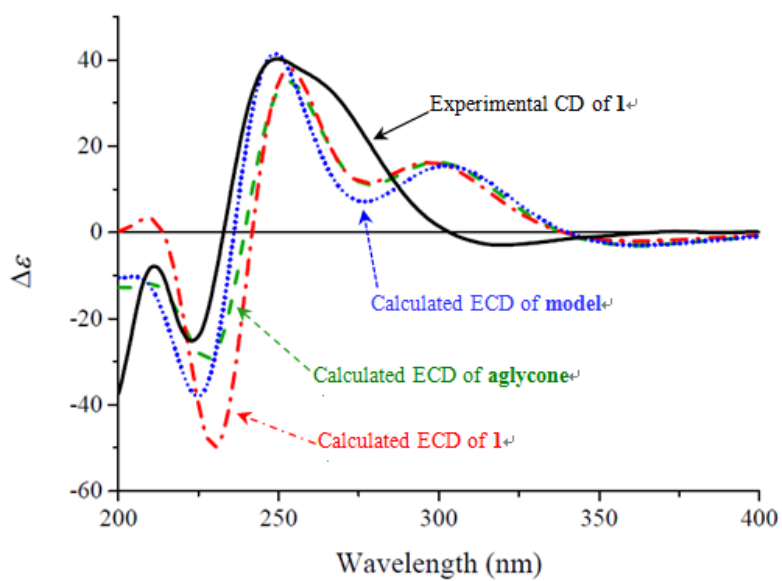

**Figure 4.** The experimental CD spectrum of **1** (black) and the calculated ECD spectra of **1** (dash dotted red), its aglycone (dashed green), and the **model** (dotted blue) in MeOH.

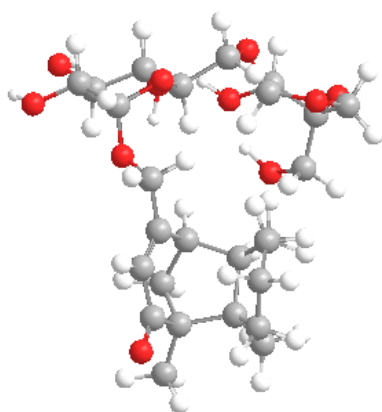

**Figure S5.** The re-optimized conformer of **2**.

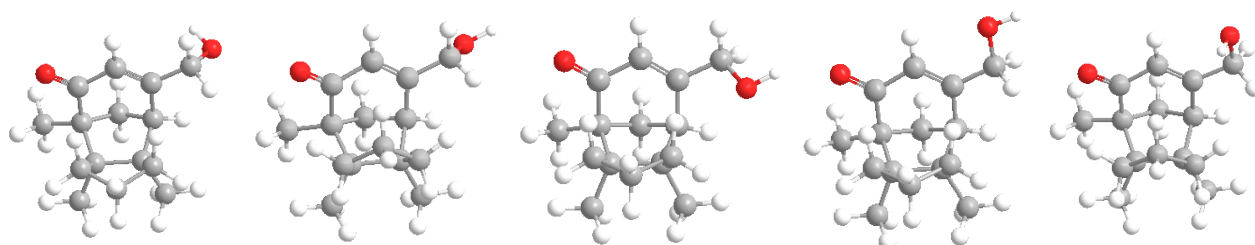

the aglycone of **2** C1 (8.8%)    the aglycone of **2** C2 (4.5%)    the aglycone of **2** C3 (2.0%)    the aglycone of **2** C4 (30.6%)    the aglycone of **2** C5 (54.0%)

**Figure S6.** The re-optimized five conformers of the aglycone of **2** and their equilibrium populations.

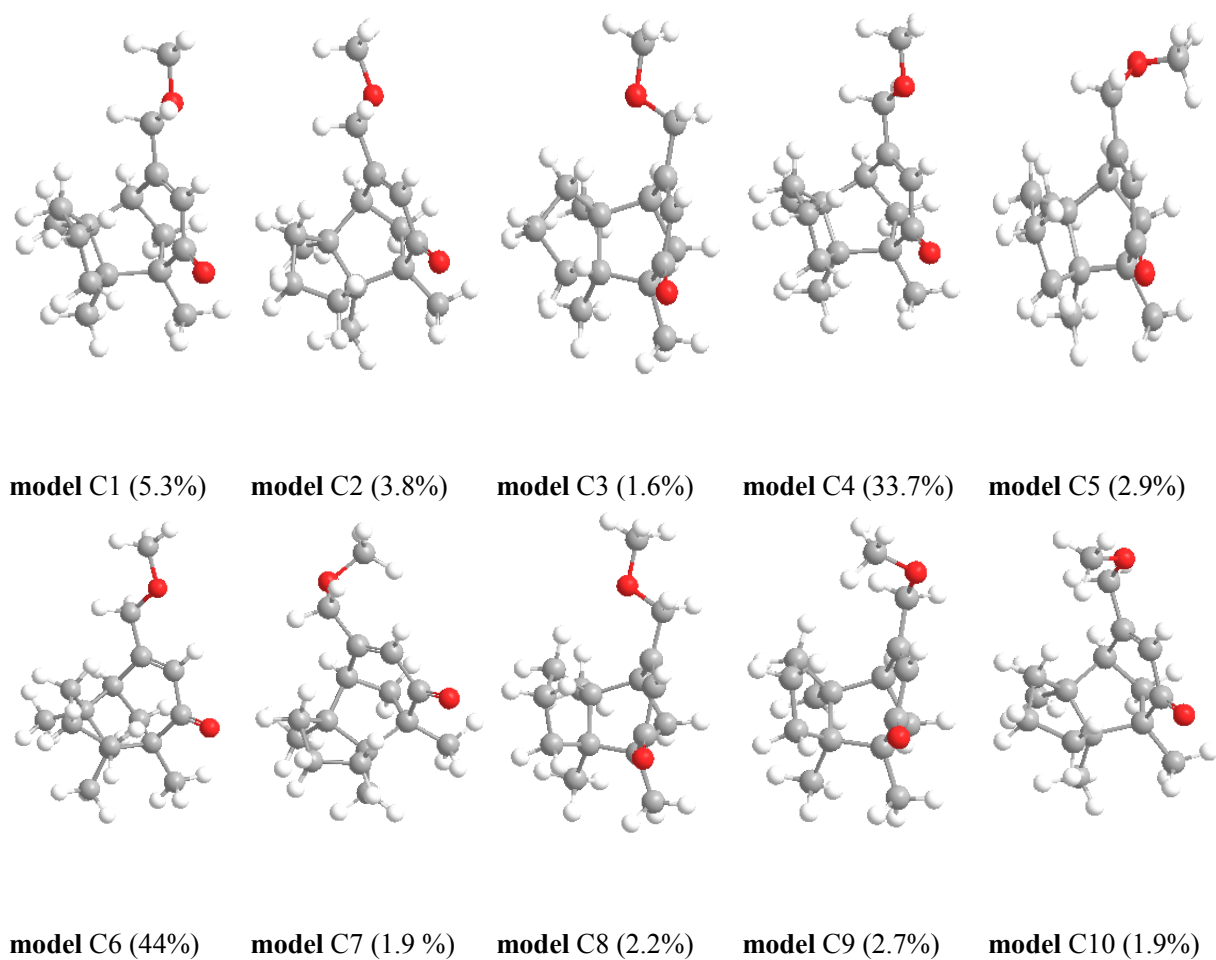

**Figure S7.** The re-optimized ten conformers of the **model** of **2** and their equilibrium populations.

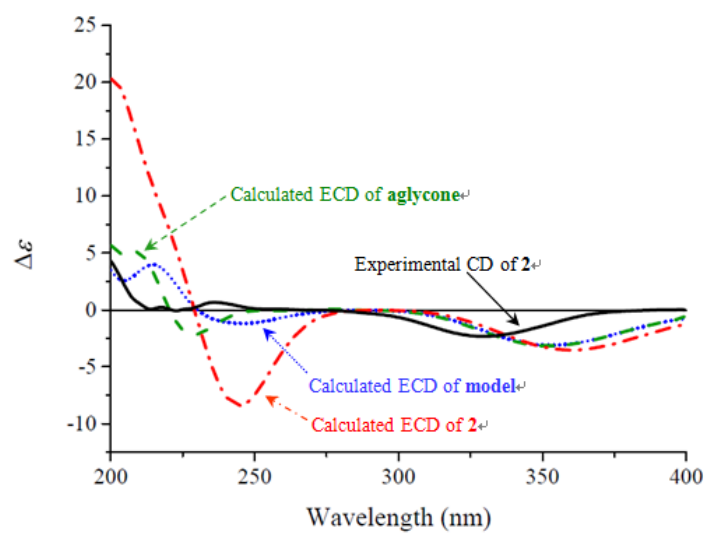

**Figure 8.** The experimental CD spectrum of **2** (black) and the calculated ECD spectra of **2** (dash dotted red), its aglycone (dashed green), and the **model** (dotted blue) in MeOH.



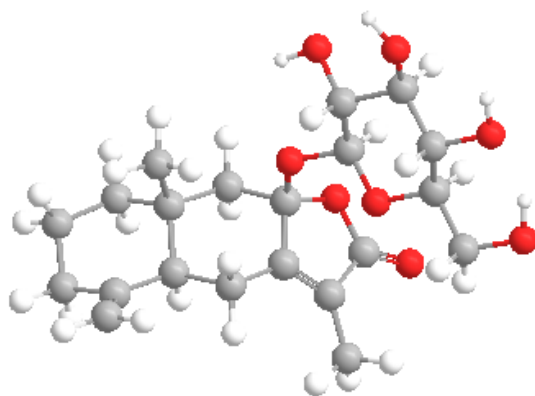

**Figure S9.** The re-optimized conformer of **3**.

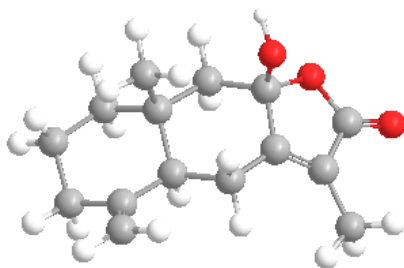

**Figure S10.** The re-optimized conformer of the aglycone of **3**.

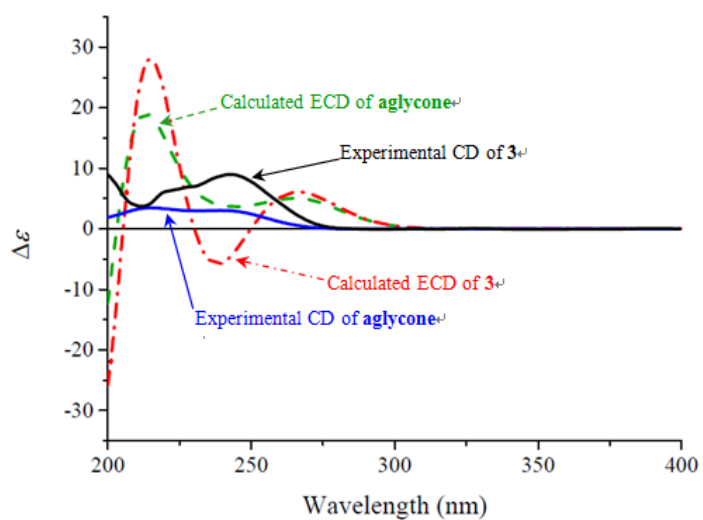

**Figure S11.** The experimental CD (black and blue) and calculated ECD (dashed and dotted red and green) spectra of **3** and its aglycone in MeOH.

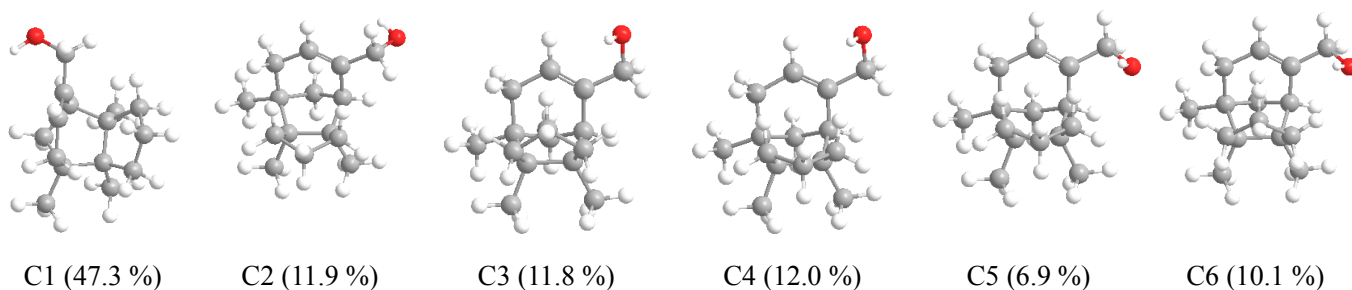

**Figure S12.** The reoptimized six conformers of (-)- $\alpha$ -barbatenol-reduction product.

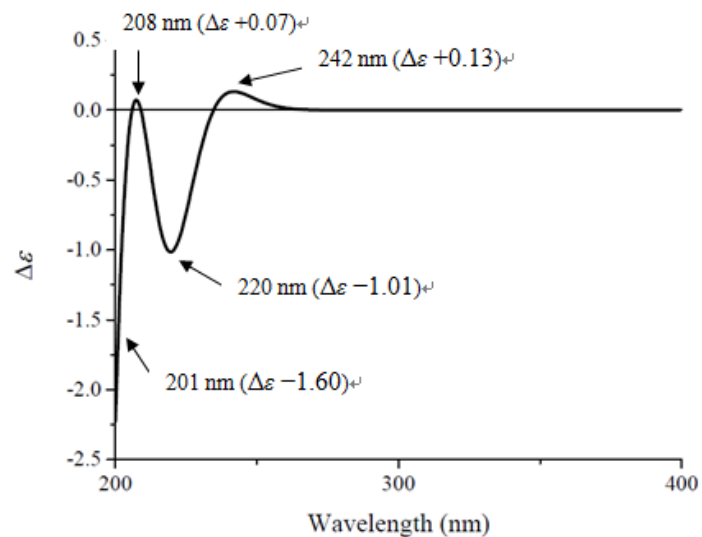

**Figure S13.** The calculated ECD spectrum of (-)- $\alpha$ -barbatenol-reduction product

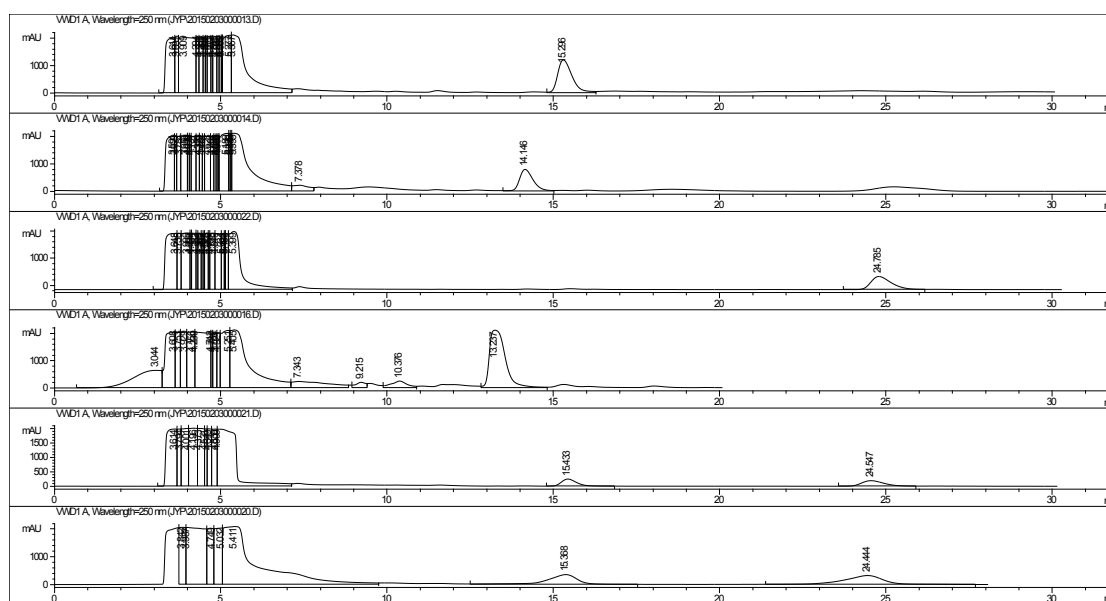

**Figure S12.** The HPLC chromatograms of the sugar derivatives, from top to bottom, for D-glucose, L-glucose, D-apirose, L-apirose, and sugars from hydrolysates of **1** and **2**.

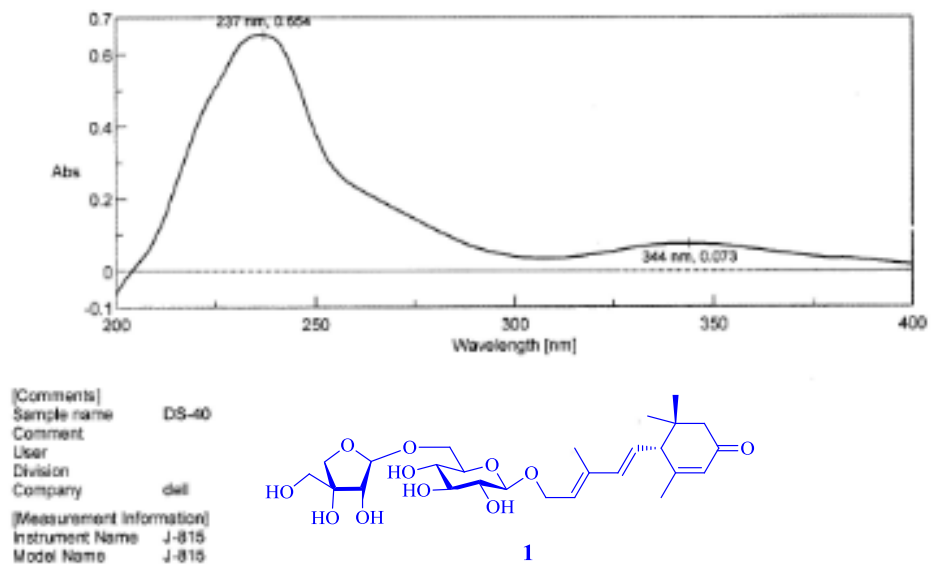

**Figure S13.** The UV spectrum of compound **1** in MeOH.

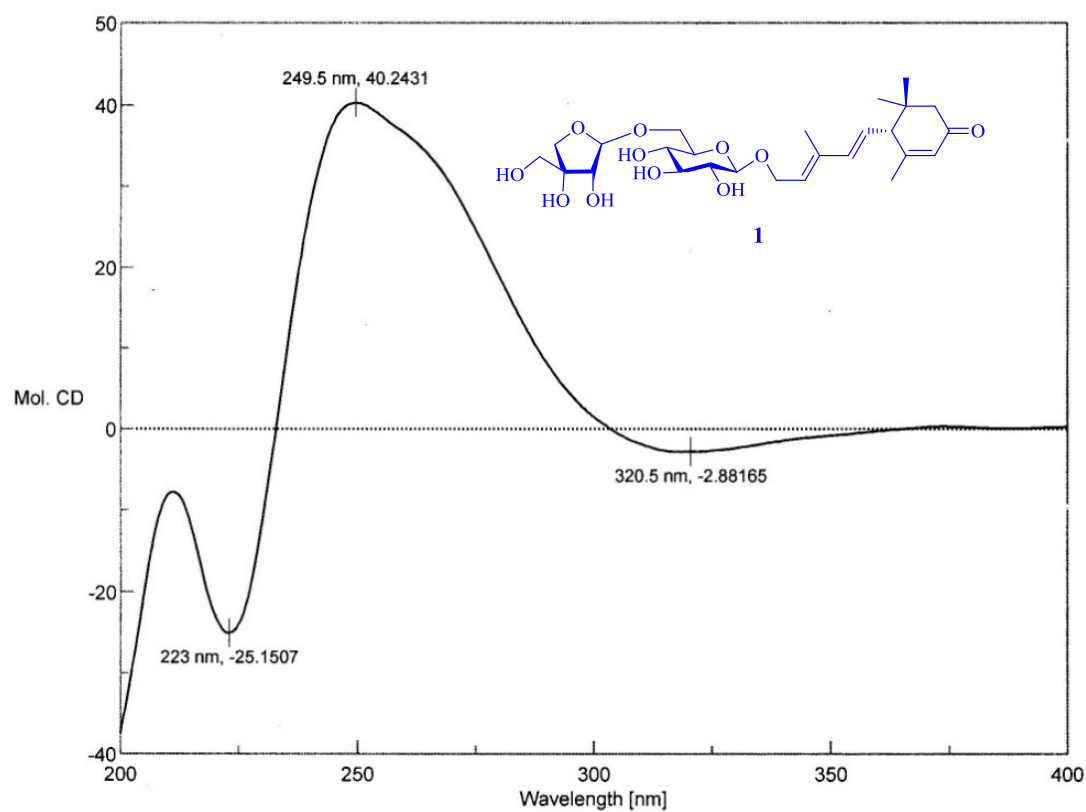

[Comments]  
 Sample name DS-40  
 Comment  
 User  
 Division  
 Company dell

[Measurement Information]  
 Instrument Name J-815  
 Model Name J-815  
 Serial No. A024461168

Accessory Standard  
 Accessory S/N A024461168  
 Cell Length 1 mm

Photometric Mode CD, HT, Abs  
 Measure Range 400 - 200 nm  
 Data pitch 0.5 nm  
 Sensitivity Standard  
 D.I.T. 2 sec  
 Band width 2.00 nm  
 Start Mode Immediately  
 Scanning Speed 100 nm/min  
 Baseline Correction Baseline  
 Shutter Control Auto  
 PMT Voltage Auto  
 Accumulations 3  
 Solvent MEOH  
 Concentration 0.07 (w/v)%

[Detailed Information]

Creation date 2014-5-20 9:34

Data array type Linear data array \* 3  
 Horizontal axis Wavelength [nm]  
 Vertical axis(1) Mol. CD  
 Vertical axis(2) HT [V]  
 Vertical axis(3) Abs  
 Start 400 nm  
 End 200 nm  
 Data interval 0.5 nm  
 Data points 401

Figure S14. The CD spectrum of compound 1 in MeOH.

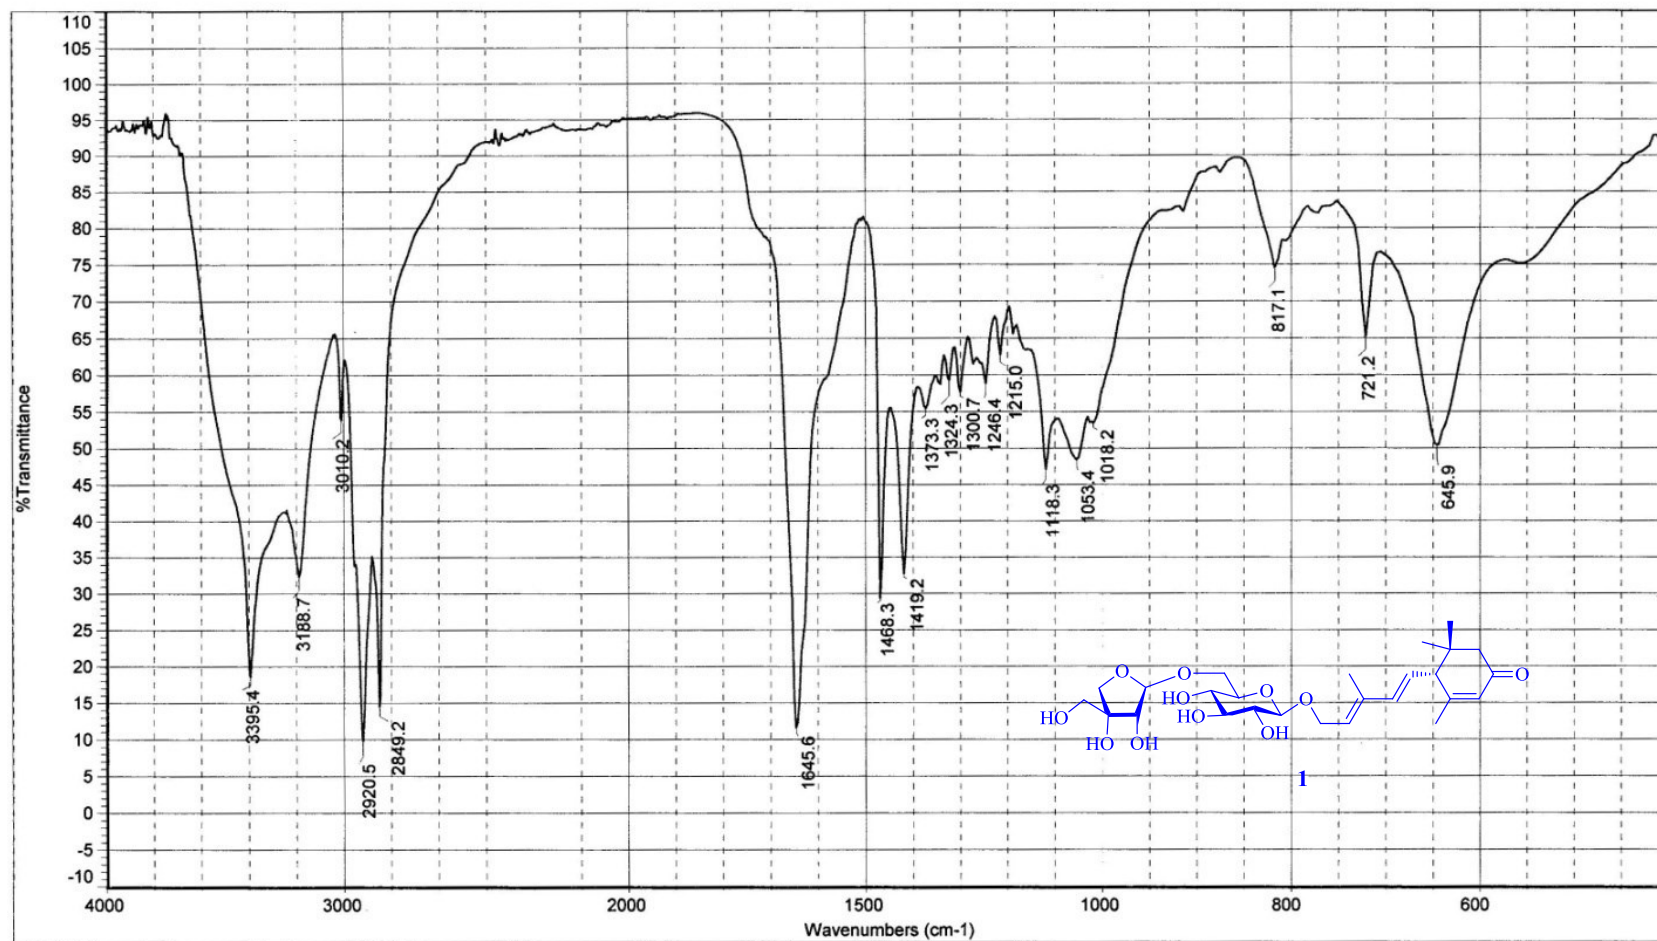

日期: 星期四 6月 05 12:11:44 2014 (GMT+08:00) Sample Name: DS - 40 (显微镜透射法FT- IR Microscope Transmission)

扫描次数: 100

傅里叶变换显微镜红外(FT-IR Microscope): Centaurus

分辨率: 8.000

美国热电公司(Thermo)傅里叶变换红外光谱仪:Nicolet 5700

Figure S15. The IR spectrum of compound 1.

# Single Mass Spectrum Deconvolution Report

**Analysis Name:** jngyp103.d    **Instrument:** LC-MSD-Trap-SL    **Print Date:** 12/23/2013 12:41:42 PM  
**Method:** TEST.MS    **Operator:** Operator    **Acq. Date:** 12/23/2013 11:42:49 AM  
**Sample Name:** DS-40  
**Analysis Info:**

## Acquisition Parameter:

|                 |            |                       |            |                |           |
|-----------------|------------|-----------------------|------------|----------------|-----------|
| Mass Range Mode | Std/Normal | Trap Drive            | 36.3       | Scan Begin     | 150 m/z   |
| Ion Polarity    | Positive   | Octopole RF Amplitude | 171.0 Vpp  | Scan End       | 700 m/z   |
| Ion Source Type | ESI        | Capillary Exit        | 106.0 Volt | Averages       | 5 Spectra |
| Dry Temp (Set)  | 330 °C     | Skimmer               | 40.0 Volt  | Max. Accu Time | 200000 µs |
| Nebulizer (Set) | 15.00 psi  | Oct 1 DC              | 12.00 Volt | ICC Target     | 20000     |
| Dry Gas (Set)   | 6.00 l/min | Oct 2 DC              | 1.70 Volt  | Charge Control | on        |

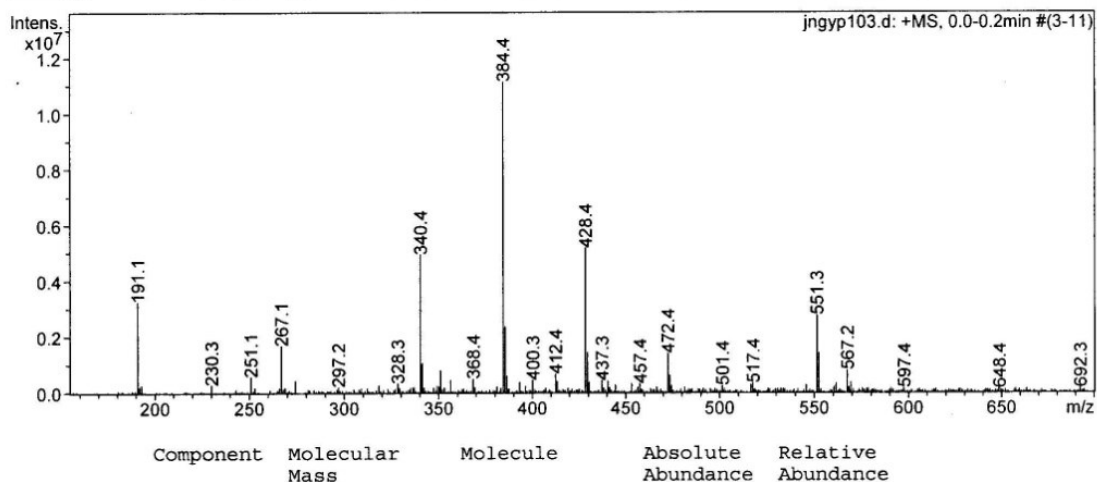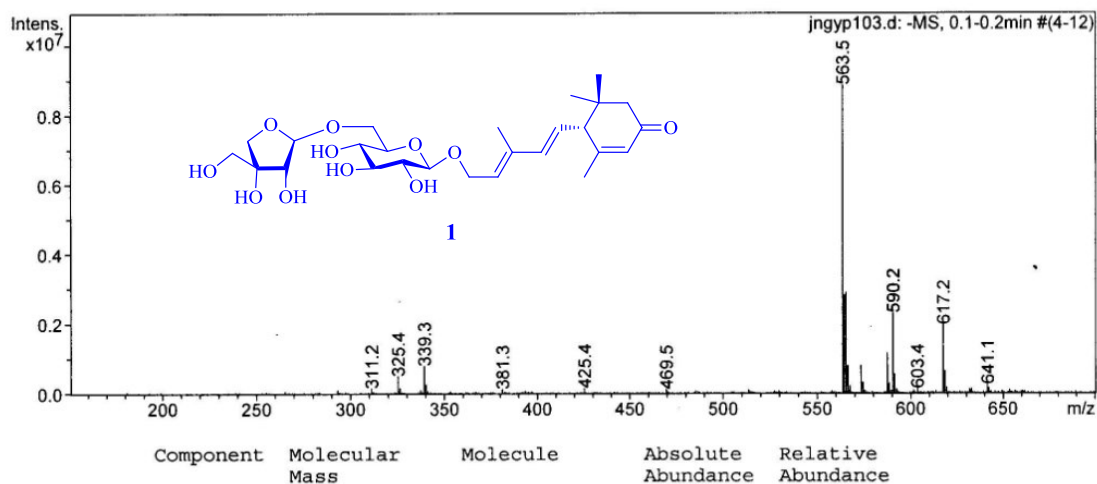

Figure S16. The ESI mass spectrum of compound 1.

# Qualitative Analysis Report

|                 |              |                        |            |
|-----------------|--------------|------------------------|------------|
| Data Filename   | 2014010601.d | Sample Name            | DS-40      |
| Sample Type     | Sample       | Position               | P1-C3      |
| Instrument Name | Instrument 1 | User Name              |            |
| Acq Method      |              | IRM Calibration Status | XXXXXXXXXX |
| DA Method       | TEST LCMS.m  | Comment                |            |

## User Chromatograms

Fragmentor Voltage 135    Collision Energy 0    Ionization Mode ESI

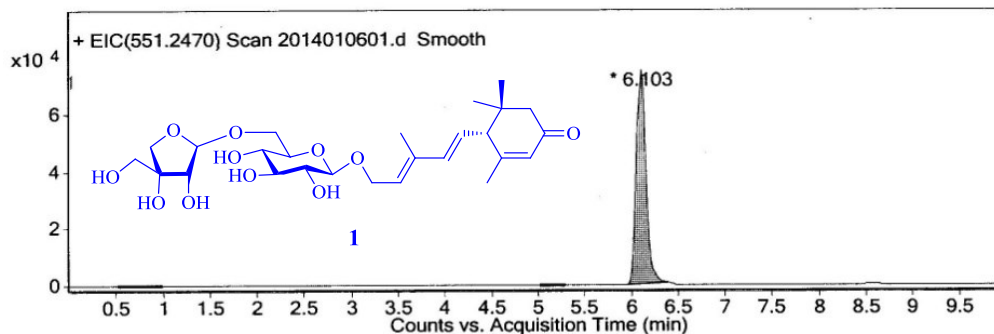

### Integration Peak List

| Peak | Start | RT    | End   | Height | Area   | Area % | Signal To Noise |
|------|-------|-------|-------|--------|--------|--------|-----------------|
| 1    | 5.958 | 6.103 | 6.393 | 75115  | 534180 | 100    | Infinity        |

### Noise Measurements

| Noise Type   | Signal Definition | Noise Multiplier | Noise Value |
|--------------|-------------------|------------------|-------------|
| Peak-to-Peak | Area              | 1                | 0           |

### Noise Regions

| Start | End |
|-------|-----|
| 0.5   | 1   |
| 5     | 5.3 |
| 9.99  | 11  |

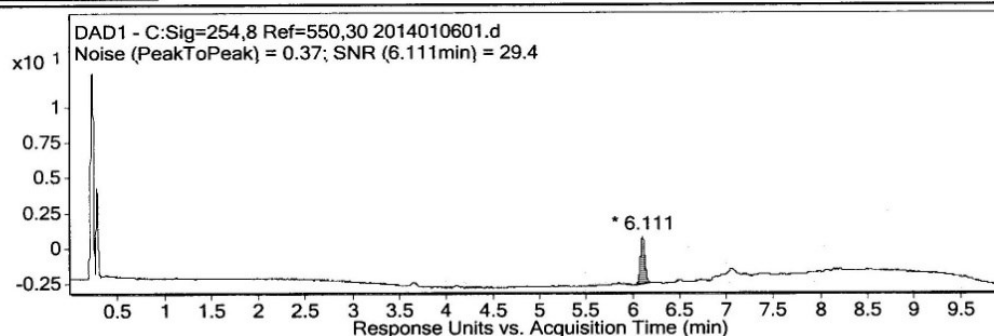

### Integration Peak List

| Peak | Start | RT    | End   | Height | Area  | Area % | Signal To Noise |
|------|-------|-------|-------|--------|-------|--------|-----------------|
| 1    | 6.016 | 6.111 | 6.189 | 3.35   | 10.84 | 100    | 29.4            |

### Noise Measurements

| Noise Type   | Signal Definition | Noise Multiplier | Noise Value |
|--------------|-------------------|------------------|-------------|
| Peak-to-Peak | Area              | 1                | 0.36907196  |

### Noise Regions

| Start | End |
|-------|-----|
| 0.5   | 1   |
| 5     | 5.3 |
| 9.99  | 11  |

## User Spectra

Figure S17. The (+)-HR-ESI-MS report of compound 1, page 1.

# Qualitative Analysis Report

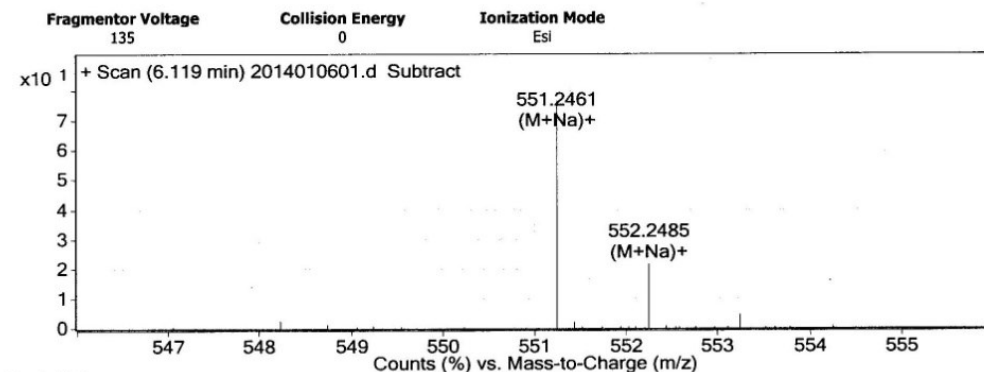

**Peak List**

| m/z      | z | Abund  | Formula        | Ion     |
|----------|---|--------|----------------|---------|
| 101.0083 |   | 39257  |                |         |
| 116.9859 |   | 43150  |                |         |
| 133.0342 | 1 | 60415  |                |         |
| 133.0966 |   | 39551  |                |         |
| 277.128  | 1 | 90968  |                |         |
| 284.1122 | 2 | 35480  |                |         |
| 294.1545 |   | 45155  |                |         |
| 299.1104 | 1 | 133236 |                |         |
| 551.2461 | 1 | 102137 | C26 H40 Na O11 | (M+Na)+ |
| 597.2391 | 1 | 34096  |                |         |

**Formula Calculator Element Limits**

| Element | Min | Max |
|---------|-----|-----|
| C       | 3   | 100 |
| H       | 0   | 500 |
| O       | 0   | 90  |
| N       | 0   | 5   |
| S       | 0   | 2   |
| Cl      | 0   | 0   |
| Br      | 0   | 0   |
| Si      | 0   | 0   |
| F       | 0   | 0   |
| P       | 0   | 0   |

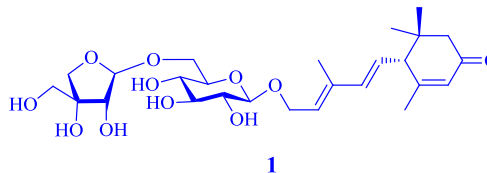

**Formula Calculator Results**

| Formula          | Best | Mass     | Tgt Mass | Diff (ppm) | Ion Species         | Score |
|------------------|------|----------|----------|------------|---------------------|-------|
| C26 H40 O11      | TRUE | 528.2568 | 528.2571 | 0.43       | C26 H40 Na O11      | 99.96 |
| C27 H36 N4 O7    |      | 528.2568 | 528.2584 | 2.95       | C27 H36 N4 Na O7    | 99.65 |
| C30 H40 O6 S     |      | 528.2568 | 528.2546 | -4.31      | C30 H40 Na O6 S     | 98.51 |
| C31 H36 N4 O2 S  |      | 528.2568 | 528.2559 | -1.79      | C31 H36 N4 Na O2 S  | 98.39 |
| C27 H44 O6 S2    |      | 528.2568 | 528.2579 | 2.06       | C27 H44 Na O6 S2    | 97.39 |
| C28 H40 N4 O2 S2 |      | 528.2568 | 528.2593 | 4.58       | C28 H40 N4 Na O2 S2 | 97.19 |
| C22 H44 N2 O8 S2 |      | 528.2568 | 528.2539 | -5.56      | C22 H44 N2 Na O8 S2 | 96.83 |
| C36 H36 N2 S     |      | 528.2568 | 528.2599 | 5.83       | C36 H36 N2 Na S     | 96.57 |
| C39 H32 N2       |      | 528.2568 | 528.2565 | -0.55      | C39 H32 N2 Na       | 96.3  |

--- End Of Report ---

Figure S18. The (+)-HR-ESI-MS report of compound 1, page 2.



MS Formula Results: + Scan (6.119 min) Sub (2014010601.d)

| m/z      | Ion                 | Formula        | Abundance |
|----------|---------------------|----------------|-----------|
| 551.2461 | (M+Na) <sup>+</sup> | C26 H40 Na O11 | 102137    |

  

| Best                                | Formula (M)      | Ion Formula         | Calc m/z | Score | Cross S | Mass     | Calc Mass | Diff (ppm) | Abs Diff (ppm) | Abund Match | Spacing Mat | Mass Match | m/z      | DBE |
|-------------------------------------|------------------|---------------------|----------|-------|---------|----------|-----------|------------|----------------|-------------|-------------|------------|----------|-----|
| <input checked="" type="checkbox"/> | C26 H40 O11      | C26 H40 Na O11      | 551.2463 | 99.96 |         | 528.2568 | 528.2571  | 0.43       | 0.43           | 99.93       | 99.91       | 99.99      | 551.2461 | 7   |
| <input type="checkbox"/>            | C27 H36 N4 O7    | C27 H36 N4 Na O7    | 551.2476 | 99.65 |         | 528.2568 | 528.2584  | 2.95       | 2.95           | 99.26       | 99.96       | 99.72      | 551.2461 | 12  |
| <input type="checkbox"/>            | C30 H40 O6 S     | C30 H40 Na O6 S     | 551.2438 | 98.51 |         | 528.2568 | 528.2546  | -4.31      | 4.31           | 95.98       | 99.77       | 99.41      | 551.2461 | 11  |
| <input type="checkbox"/>            | C31 H36 N4 O2 S  | C31 H36 N4 Na O2 S  | 551.2451 | 98.39 |         | 528.2568 | 528.2559  | -1.79      | 1.79           | 94.69       | 99.8        | 99.9       | 551.2461 | 16  |
| <input type="checkbox"/>            | C27 H44 O6 S2    | C27 H44 Na O6 S2    | 551.2472 | 97.39 |         | 528.2568 | 528.2579  | 2.06       | 2.06           | 91.51       | 99.52       | 98.86      | 551.2461 | 6   |
| <input type="checkbox"/>            | C28 H40 N4 O2 S2 | C28 H40 N4 Na O2 S2 | 551.2485 | 97.19 |         | 528.2568 | 528.2593  | 4.58       | 4.58           | 91.67       | 99.54       | 99.33      | 551.2461 | 11  |
| <input type="checkbox"/>            | C22 H44 N2 O8 S2 | C22 H44 N2 Na O8 S2 | 551.2431 | 96.83 |         | 528.2568 | 528.2539  | -5.56      | 5.56           | 91.01       | 99.45       | 99.02      | 551.2461 | 2   |
| <input type="checkbox"/>            | C36 H36 N2 S     | C36 H36 N2 Na S     | 551.2491 | 96.57 |         | 528.2568 | 528.2599  | 5.83       | 5.83           | 89.94       | 99.84       | 98.92      | 551.2461 | 20  |
| <input type="checkbox"/>            | C39 H32 N2       | C39 H32 N2 Na       | 551.2458 | 96.3  |         | 528.2568 | 528.2565  | -0.55      | 0.55           | 87.12       | 99.92       | 99.99      | 551.2461 | 25  |

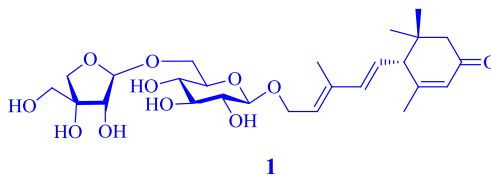

Figure S19. The (+)-HR-ESI-MS report of compound **1**, page 3.

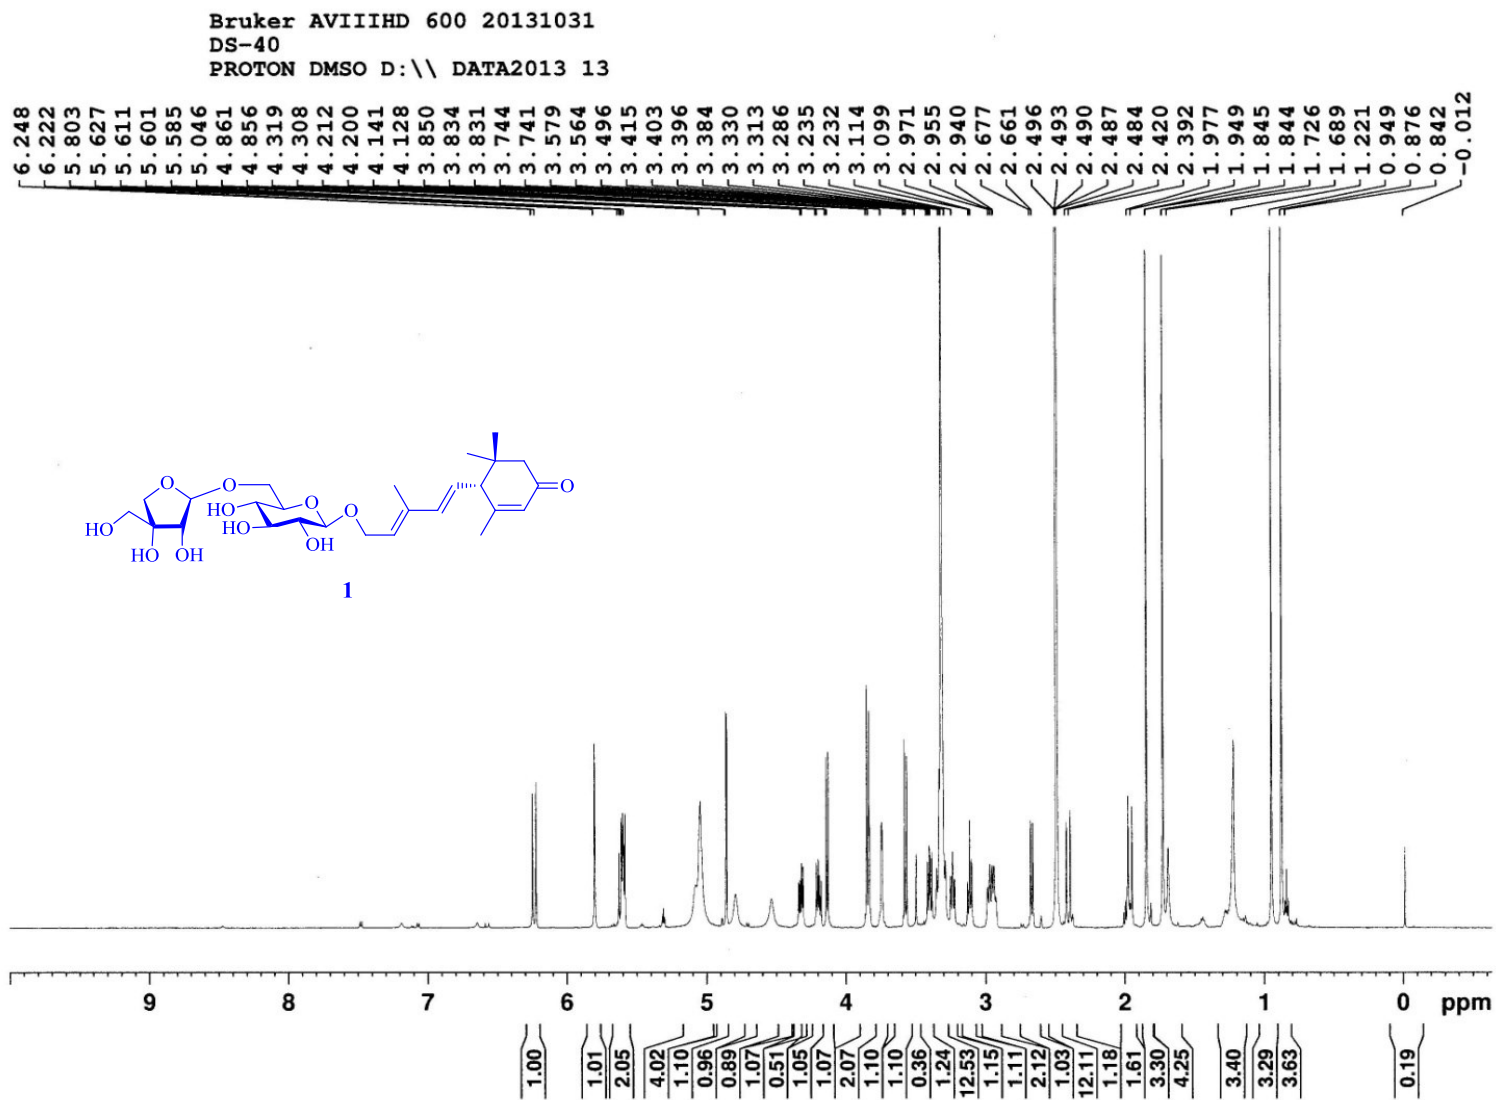

Figure S20. The  $^1\text{H}$  NMR spectrum of compound **1** in  $\text{DMSO-}d_6$  (600 MHz).

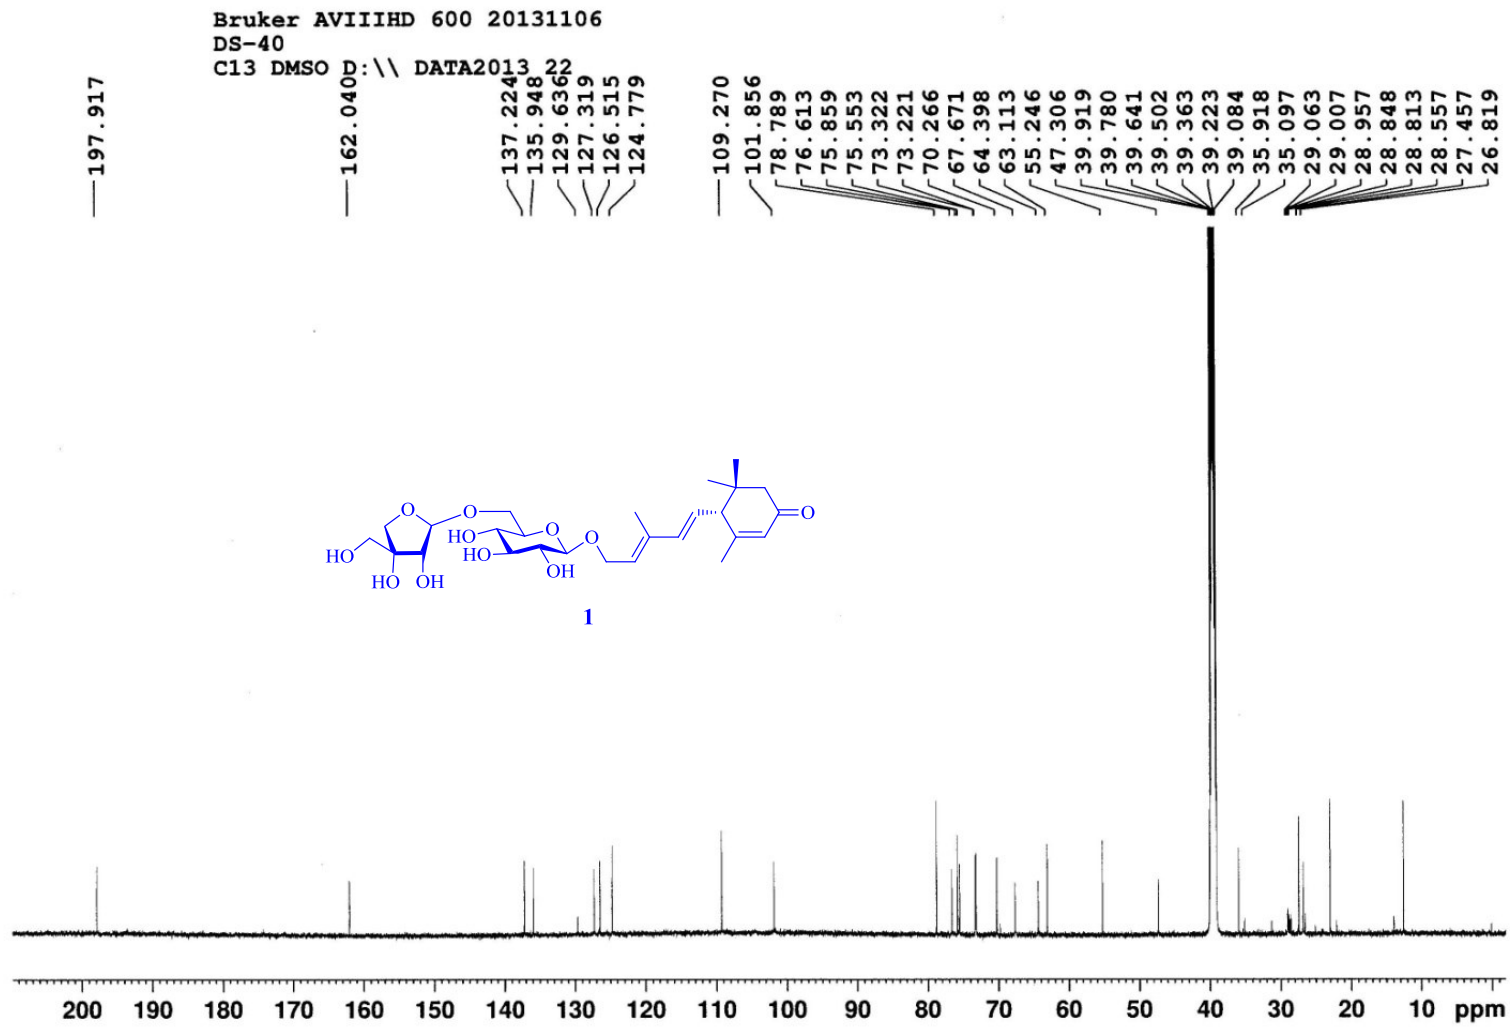

Figure S21. The  $^{13}\text{C}$  NMR spectrum of compound **1** in  $\text{DMSO-}d_6$  (150 MHz).

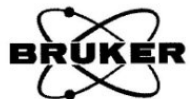

Bruker AVIIIHD 600 20131106  
DS-40 DEPT DMSO D:\ \ DATA2013 22

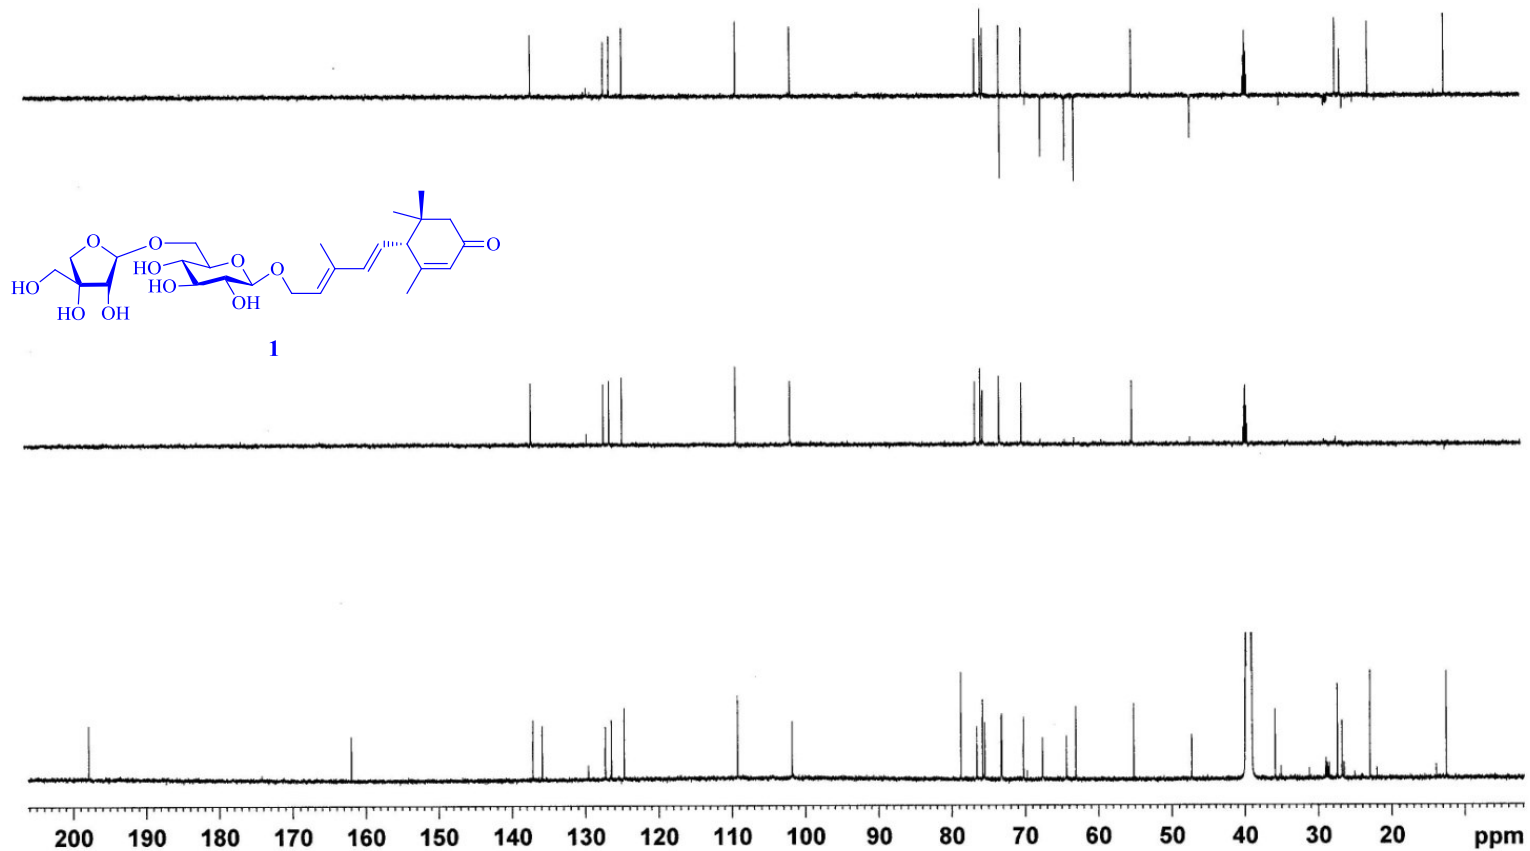

Figure S22. The DEPT spectrum of compound 1 in DMSO- $d_6$  (150 MHz).

Bruker AVIIIHD 600 20131121  
DS-40  
{H-H COSY} DMSO D:\ DATA2013 24

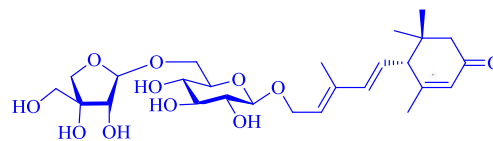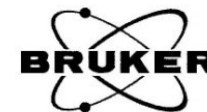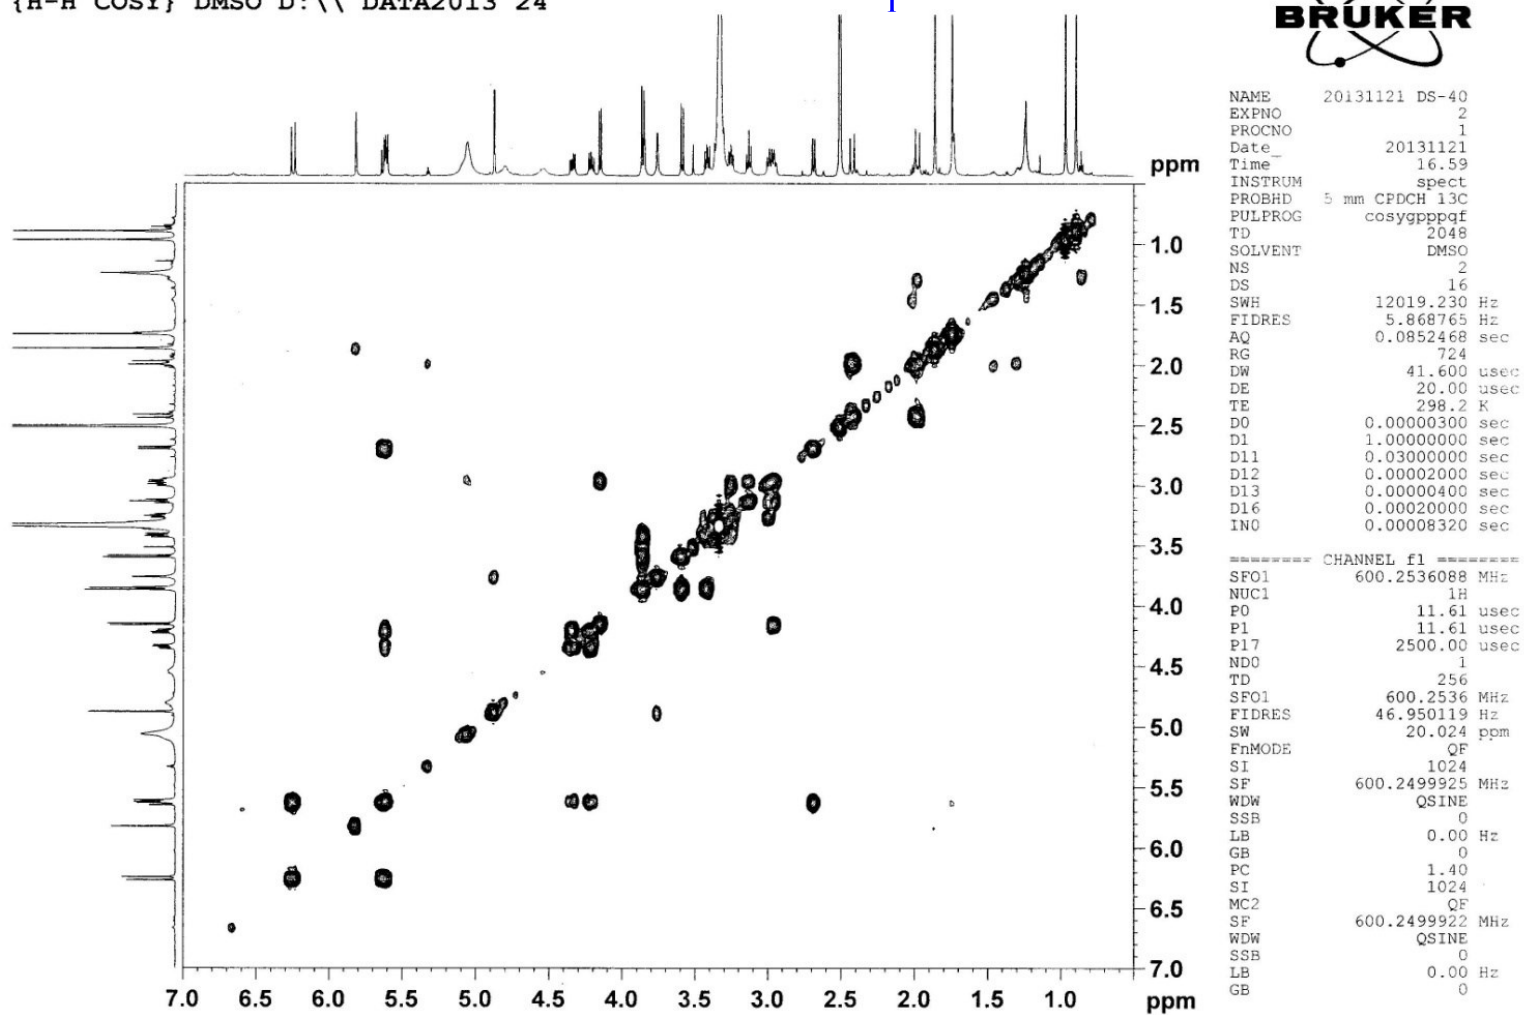

Figure S23. The  $^1\text{H}$ - $^1\text{H}$  COSY spectrum of compound 1 in DMSO- $d_6$  (600 MHz).

Bruker AVIIIHD 600 20131121  
 DS-40  
 HSQC DMSO D:\ DATA2013 24

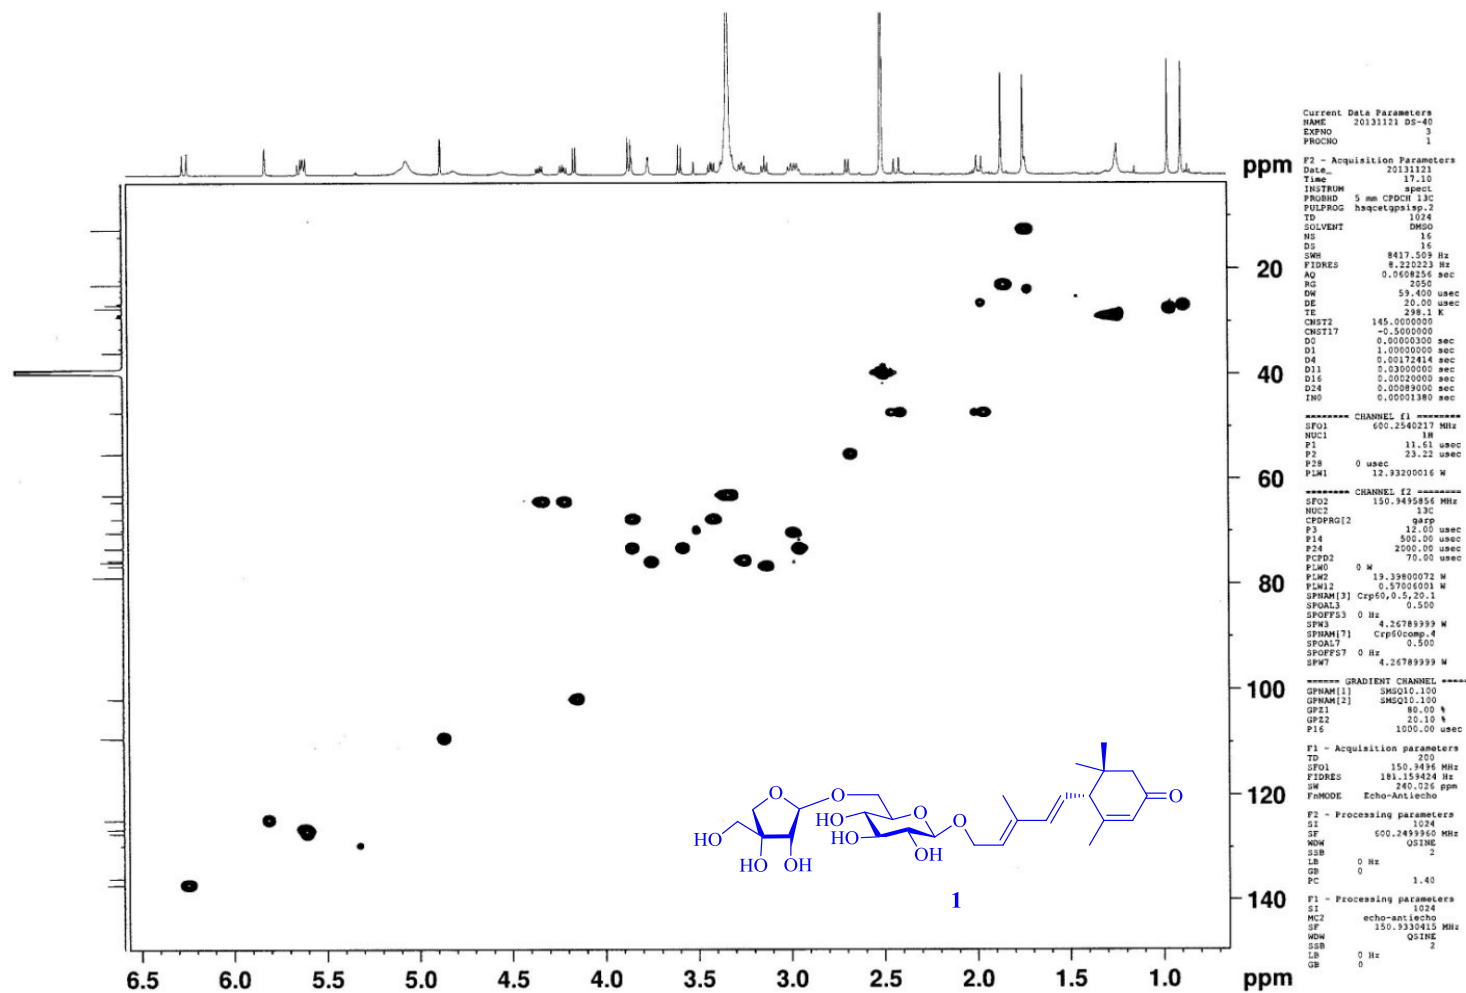

Figure S24. The HSQC spectrum of compound 1 in DMSO- $d_6$  (600 MHz for  $^1\text{H}$ ).

Bruker AVIIIHD 600 20131121  
DS-40  
HMBC DMSO D:\ DATA2013 24

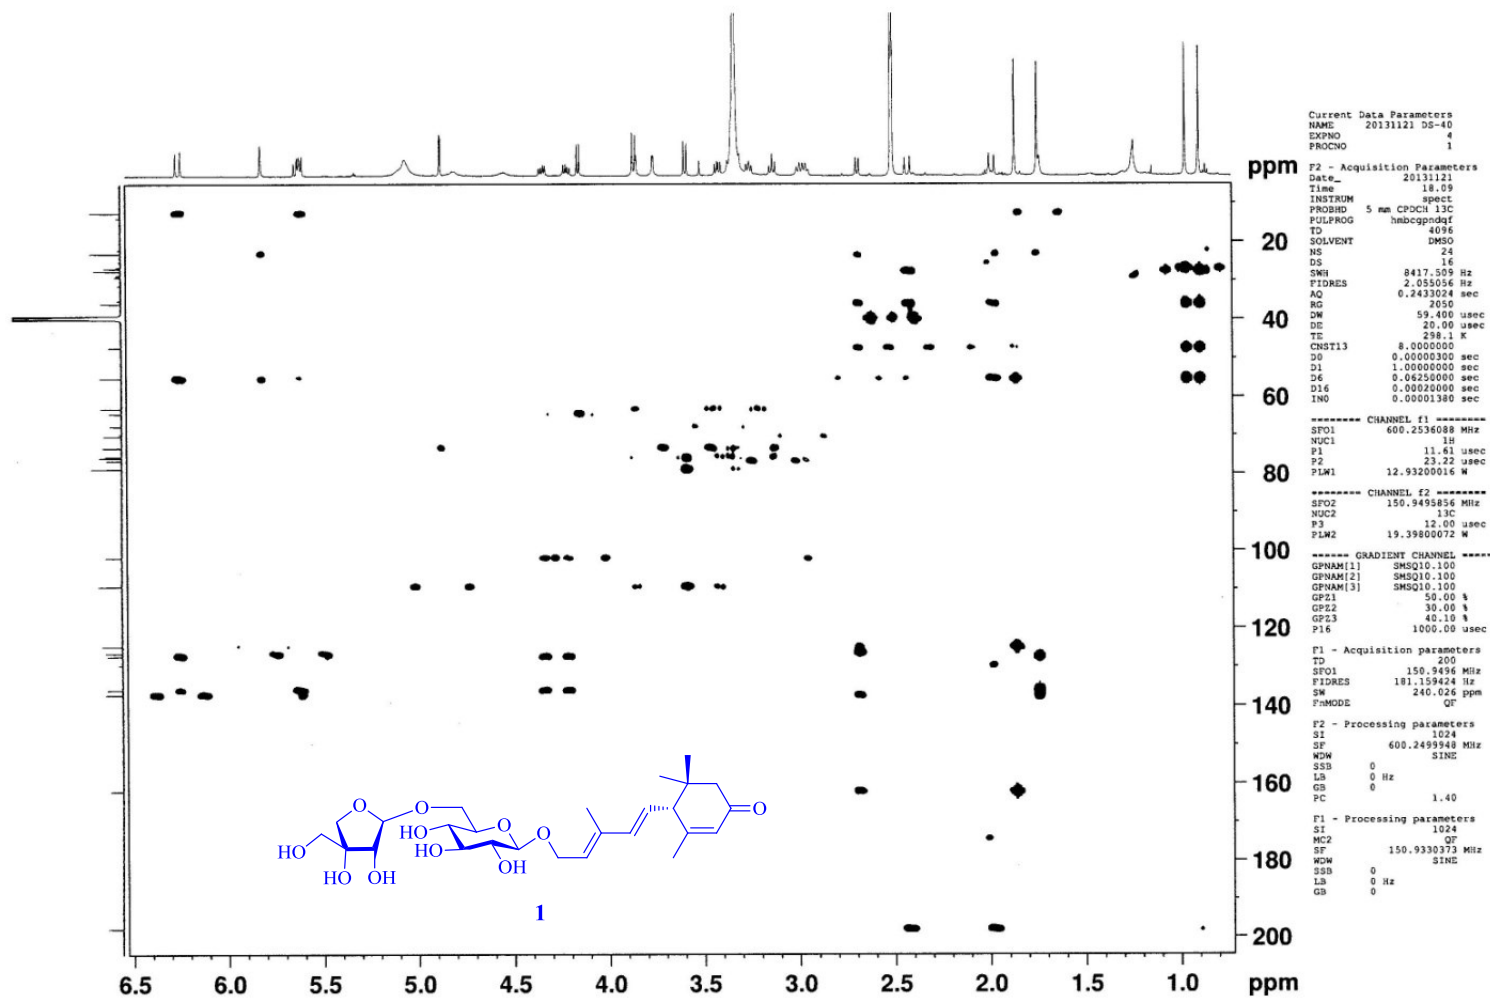

Figure S25. The HMBC spectrum of compound 1 in DMSO- $d_6$  (600 MHz for  $^1\text{H}$ ).

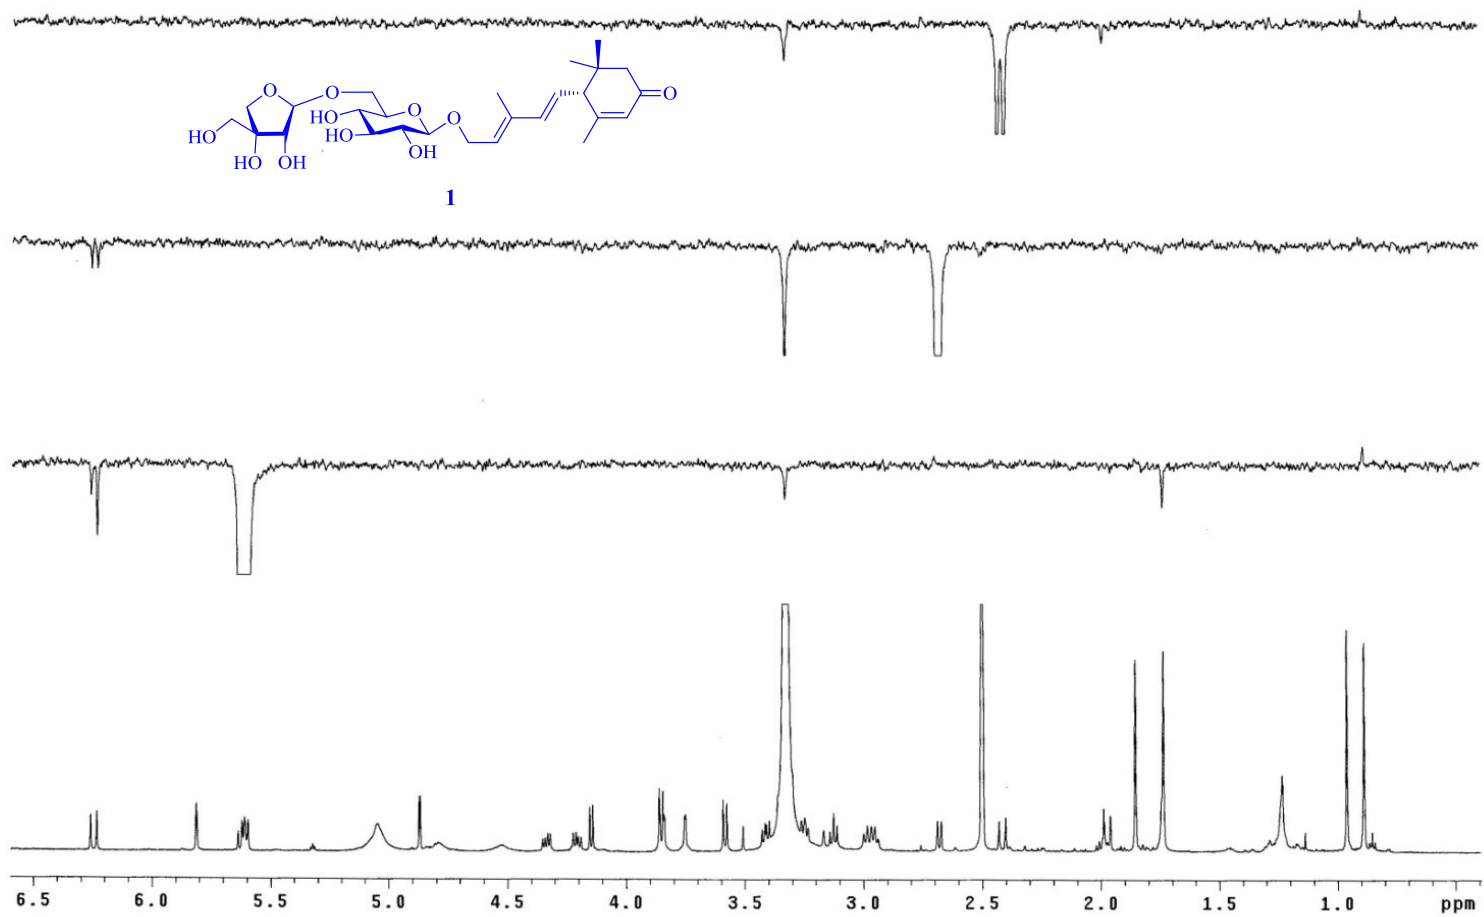

**Figure S26.** The NOE difference spectrum of **1** in DMSO-*d*<sub>6</sub> (600 MHz).



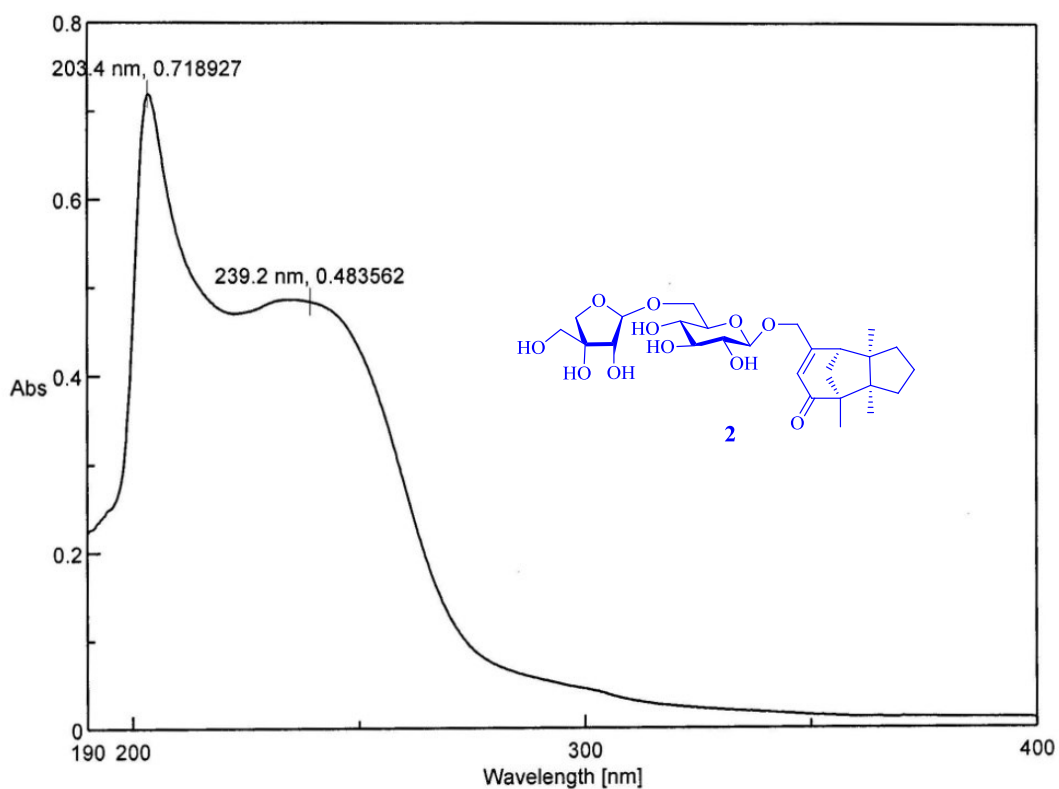

[Comment]  
 Sample Name ds-77b  
 Comment 0.02  
 User  
 Division UV  
 Company 324  
 [Measurement Information]  
 Instrument Name V-650  
 Model Name V-650  
 Serial No. A034461150

Accessory PSC-718  
 Accessory S/N A001761114  
 Position 1  
 Cell Length 10 mm  
 Temperature 19.97 C  
 Control Sensor Holder  
 Monitor Sensor Holder  
 Start Mode Start immediately

Photometric Mode Abs  
 Measurement range 400 - 190 nm  
 Data pitch 0.2 nm  
 Band width(UV/Vis) 2.0 nm  
 Response Medium  
 Scanning speed 200 nm/min  
 Source Change 340 nm  
 Light Source D2/WI  
 Filter Exchange Step  
 Correction Baseline

ds-77b

[Data Information]  
 Creation Date 2015-3-10 19:39  
 Data array type Linear data array  
 Horizontal Wavelength [nm]  
 Vertical Abs  
 Start 400 nm  
 End 190 nm  
 Data pitch 0.2 nm  
 Data points 1051

Figure S27. The UV spectrum of compound 2 in MeOH.

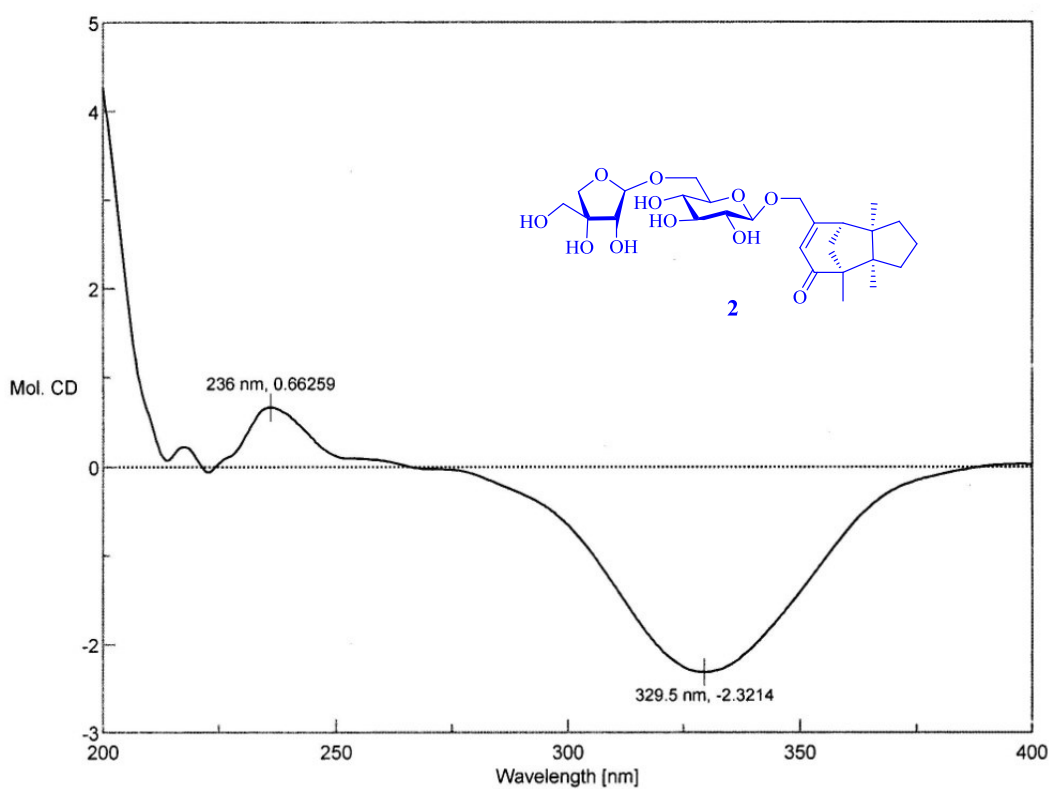

[Comments]  
 Sample name DS-77B  
 Comment  
 User  
 Division  
 Company dell

[Measurement Information]  
 Instrument Name J-815  
 Model Name J-815  
 Serial No. A024461168

Accessory Standard  
 Accessory S/N A024461168  
 Cell Length 1 mm

Photometric Mode CD, HT, Abs  
 Measure Range 400 - 200 nm  
 Data pitch 0.5 nm  
 Sensitivity Standard  
 D.I.T. 2 sec  
 Band width 2.00 nm  
 Start Mode Immediately  
 Scanning Speed 100 nm/min  
 Baseline Correction Baseline  
 Shutter Control Auto  
 PMT Voltage Auto  
 Accumulations 3  
 Solvent MEOH  
 Concentration 0.48 (w/v)%

[Detailed Information]  
 Creation date 2014-5-20 10:25

Data array type Linear data array \* 3  
 Horizontal axis Wavelength [nm]  
 Vertical axis(1) Mol. CD  
 Vertical axis(2) HT [V]  
 Vertical axis(3) Abs  
 Start 400 nm  
 End 200 nm  
 Data interval 0.5 nm  
 Data points 401

Figure S28. The CD spectrum of compound 2 in MeOH.

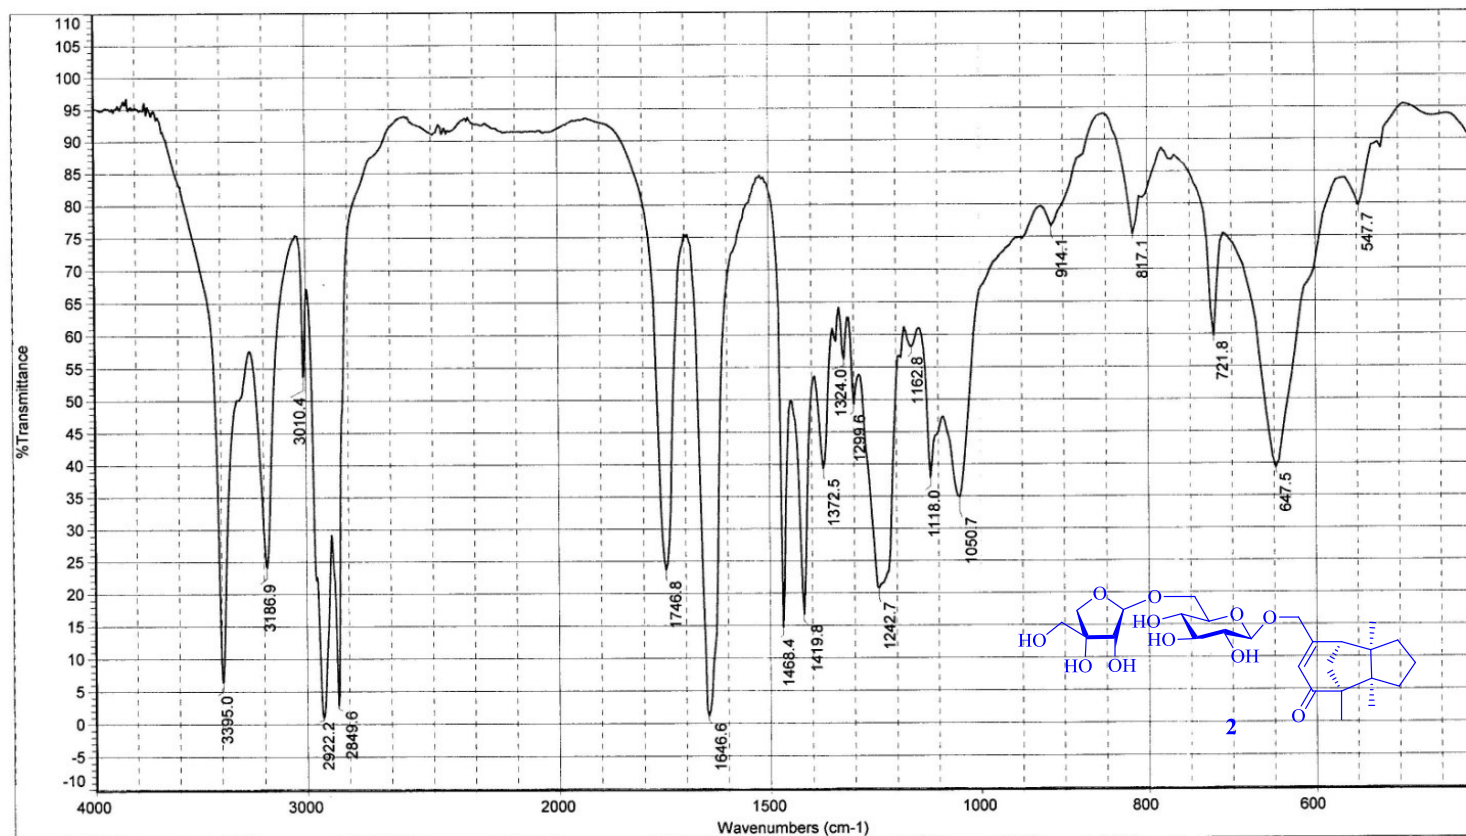

日期: 星期四 6月 05 12:37:06 2014 (GMT+08:00) Sample Name: DS - 77b (显微镜透射法FT- IR Microscope Transmission)

扫描次数: 100

傅里叶变换显微镜红外(FT-IR Microscope): Centaurus

分辨率: 8.000

美国热电公司(Thermo)傅里叶变换红外光谱仪:Nicolet 5700

Figure S29. The IR spectrum of compound 2.

# Single Mass Spectrum Deconvolution Report

**Analysis Name:** jngyp161.d    **Instrument:** LC-MSD-Trap-SL    **Print Date:** 6/27/2014 3:10:18 PM  
**Method:** TEST.MS    **Operator:** Operator    **Acq. Date:** 6/27/2014 1:56:20 PM  
**Sample Name:** DS-77b  
**Analysis Info:**

## Acquisition Parameter:

|                 |            |                       |            |                |           |
|-----------------|------------|-----------------------|------------|----------------|-----------|
| Mass Range Mode | Std/Normal | Trap Drive            | 47.2       | Scan Begin     | 300 m/z   |
| Ion Polarity    | Positive   | Octopole RF Amplitude | 194.5 Vpp  | Scan End       | 700 m/z   |
| Ion Source Type | ESI        | Capillary Exit        | 132.3 Volt | Averages       | 5 Spectra |
| Dry Temp (Set)  | 330 °C     | Skimmer               | 40.0 Volt  | Max. Accu Time | 200000 µs |
| Nebulizer (Set) | 15.00 psi  | Oct 1 DC              | 12.00 Volt | ICC Target     | 20000     |
| Dry Gas (Set)   | 6.00 l/min | Oct 2 DC              | 1.70 Volt  | Charge Control | on        |

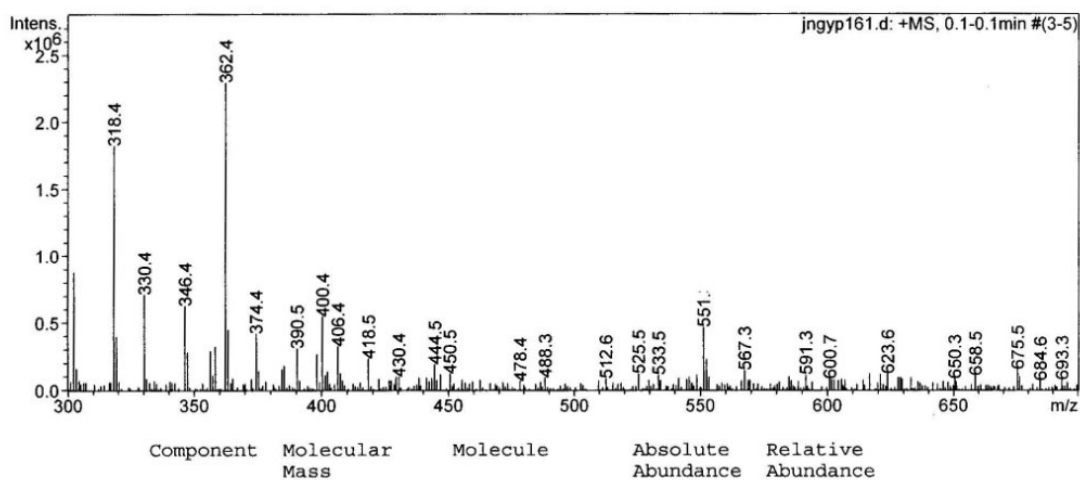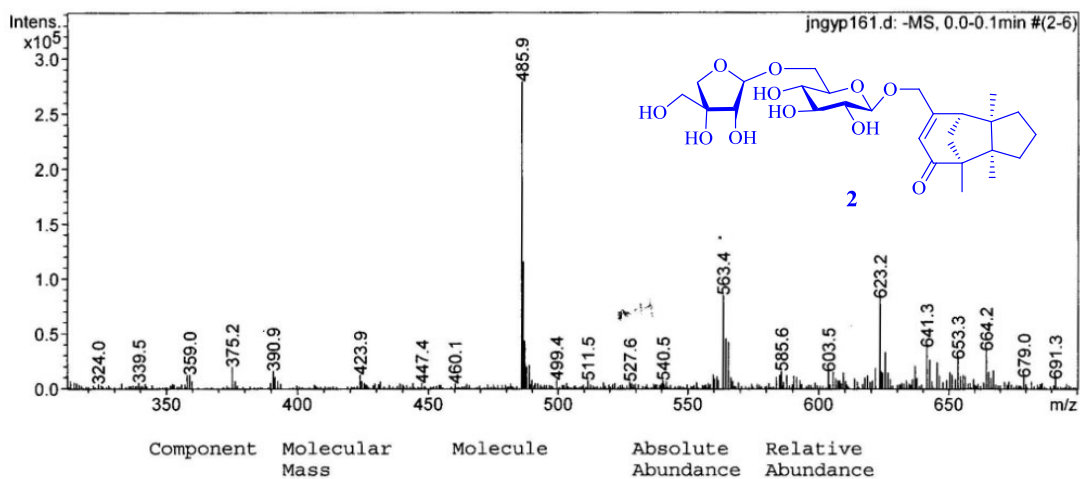

Figure S30. The ESI mass spectrum of compound 2.

# Qualitative Analysis Report

|                 |              |                        |            |
|-----------------|--------------|------------------------|------------|
| Data Filename   | 2014050801.d | Sample Name            | DS-77b     |
| Sample Type     | Sample       | Position               | P1-C1      |
| Instrument Name | Instrument 1 | User Name              |            |
| Acq Method      | TEST LCMS.m  | IRM Calibration Status | XXXXXXXXXX |
| DA Method       | TEST LCMS.m  | Comment                |            |

## User Chromatograms

Fragmentor Voltage 135    Collision Energy 0    Ionization Mode ESI

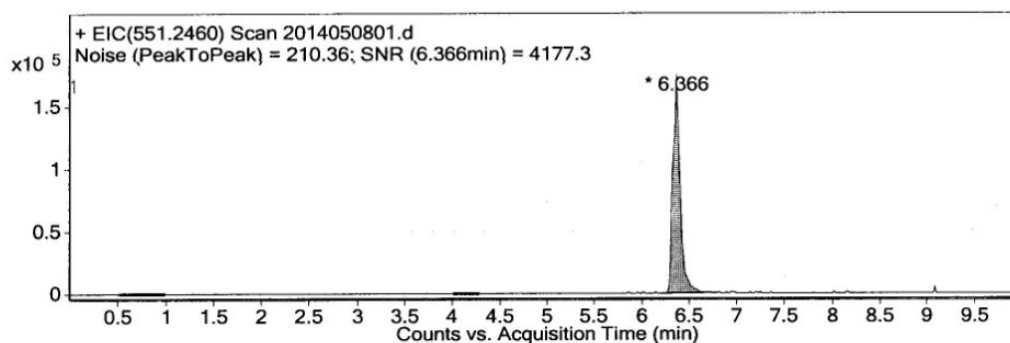

## Integration Peak List

| Peak | Start | RT    | End   | Height | Area   | Area % | Signal To Noise |
|------|-------|-------|-------|--------|--------|--------|-----------------|
| 1    | 6.221 | 6.366 | 6.736 | 175229 | 878751 | 100    | 4177.3          |

## Noise Measurements

| Noise Type   | Signal Definition | Noise Multiplier | Noise Value |
|--------------|-------------------|------------------|-------------|
| Peak-to-Peak | Area              | 1                | 210.3635864 |

## Noise Regions

| Start | End |
|-------|-----|
| 0.5   | 1   |
| 4     | 4.3 |
| 9.99  | 11  |

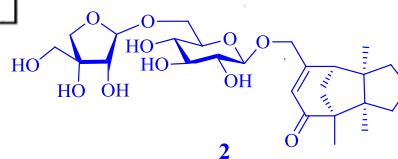

## User Spectra

Fragmentor Voltage 135    Collision Energy 0    Ionization Mode ESI

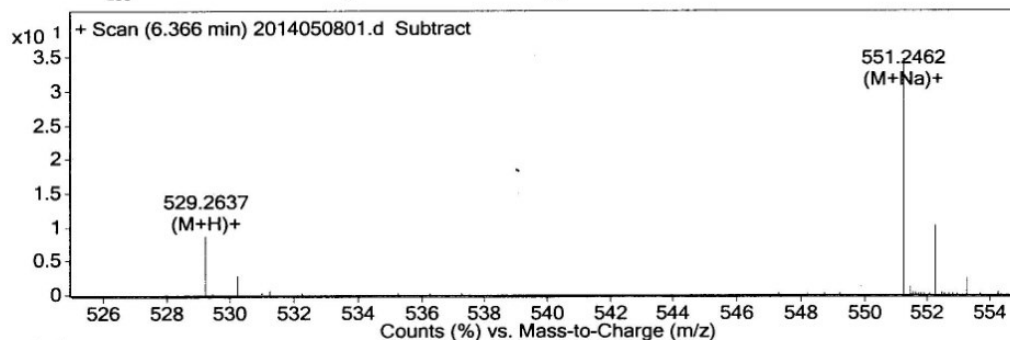

## Peak List

| m/z      | z | Abund  | Formula | Ion |
|----------|---|--------|---------|-----|
| 199.1804 | 1 | 506216 |         |     |
| 200.1827 | 1 | 71124  |         |     |
| 214.0896 | 1 | 213460 |         |     |
| 221.1609 |   | 56675  |         |     |
| 231.1157 |   | 63052  |         |     |
| 236.072  |   | 53527  |         |     |
| 257.1678 | 1 | 254513 |         |     |
| 397.2219 | 1 | 139477 |         |     |

Figure S31. The (+)-HR-ESI-MS report of compound 2, page 1.

## Qualitative Analysis Report

| <i>m/z</i> | <i>z</i> | Abund  | Formula        | Ion     |
|------------|----------|--------|----------------|---------|
| 551.2462   | 1        | 175385 | C26 H40 Na O11 | (M+Na)+ |
| 552.2494   | 1        | 51318  | C26 H40 Na O11 | (M+Na)+ |

### Formula Calculator Element Limits

| Element | Min | Max |
|---------|-----|-----|
| C       | 3   | 100 |
| H       | 0   | 500 |
| O       | 0   | 90  |
| N       | 0   | 5   |
| S       | 0   | 0   |
| Cl      | 0   | 0   |
| Br      | 0   | 0   |
| Si      | 0   | 0   |
| F       | 0   | 0   |
| P       | 0   | 0   |

### Formula Calculator Results

| Formula       | Best | Mass     | Tgt Mass | Diff (ppm) | Ion Species      | Score |
|---------------|------|----------|----------|------------|------------------|-------|
| C26 H40 O11   | TRUE | 528.257  | 528.2571 | 0.11       | C26 H40 Na O11   | 99.98 |
| C27 H36 N4 O7 |      | 528.257  | 528.2584 | 2.63       | C27 H36 N4 Na O7 | 99.74 |
| C27 H36 N4 O7 |      | 528.2565 | 528.2584 | 3.68       | C27 H37 N4 O7    | 99.72 |
| C26 H40 O11   | TRUE | 528.2564 | 528.2571 | 1.17       | C26 H41 O11      | 99.67 |
| C39 H32 N2    |      | 528.2565 | 528.2565 | 0.19       | C39 H33 N2       | 98.2  |

--- End Of Report ---

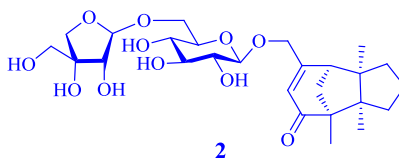

MS Formula Results: + Scan (6.366 min) Sub (2014050801.d)

| m/z      | Ion                | Formula     | Abundance |
|----------|--------------------|-------------|-----------|
| 529.2637 | (M+H) <sup>+</sup> | C26 H41 O11 | 43614.1   |

  

| Best | Formula (M)   | Ion Formula   | Calc m/z | Score | Cross S | Mass     | Calc Mass | Diff (ppm) | Abs Diff (ppm) | Abund Match | Spacing Mat | Mass Match | m/z      | DBE |
|------|---------------|---------------|----------|-------|---------|----------|-----------|------------|----------------|-------------|-------------|------------|----------|-----|
| ☐    | C27 H36 N4 O7 | C27 H37 N4 O7 | 529.2657 | 99.72 |         | 528.2565 | 528.2584  | 3.68       | 3.68           | 99.83       | 99.96       | 99.53      | 529.2637 | 12  |
| ☐    | C26 H40 O11   | C26 H41 O11   | 529.2643 | 99.67 |         | 528.2564 | 528.2571  | 1.17       | 1.17           | 98.94       | 99.99       | 99.95      | 529.2637 | 7   |
| ☐    | C39 H32 N2    | C39 H33 N2    | 529.2638 | 98.2  |         | 528.2565 | 528.2565  | 0.19       | 0.19           | 93.72       | 99.98       | 100        | 529.2637 | 25  |

  

| m/z      | Ion                 | Formula        | Abundance |
|----------|---------------------|----------------|-----------|
| 551.2462 | (M+Na) <sup>+</sup> | C26 H40 Na O11 | 175384.6  |

  

| Best | Formula (M)   | Ion Formula      | Calc m/z | Score | Cross S | Mass    | Calc Mass | Diff (ppm) | Abs Diff (ppm) | Abund Match | Spacing Mat | Mass Match | m/z      | DBE |
|------|---------------|------------------|----------|-------|---------|---------|-----------|------------|----------------|-------------|-------------|------------|----------|-----|
| ☐    | C26 H40 O11   | C26 H40 Na O11   | 551.2463 | 99.98 |         | 528.257 | 528.2571  | 0.11       | 0.11           | 99.95       | 99.99       | 100        | 551.2462 | 7   |
| ☐    | C27 H36 N4 O7 | C27 H36 N4 Na O7 | 551.2476 | 99.74 |         | 528.257 | 528.2584  | 2.63       | 2.63           | 99.47       | 100         | 99.78      | 551.2462 | 12  |

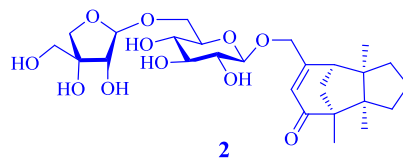

Figure S33. The (+)-HR-ESI-MS report of compound 2, page 3.

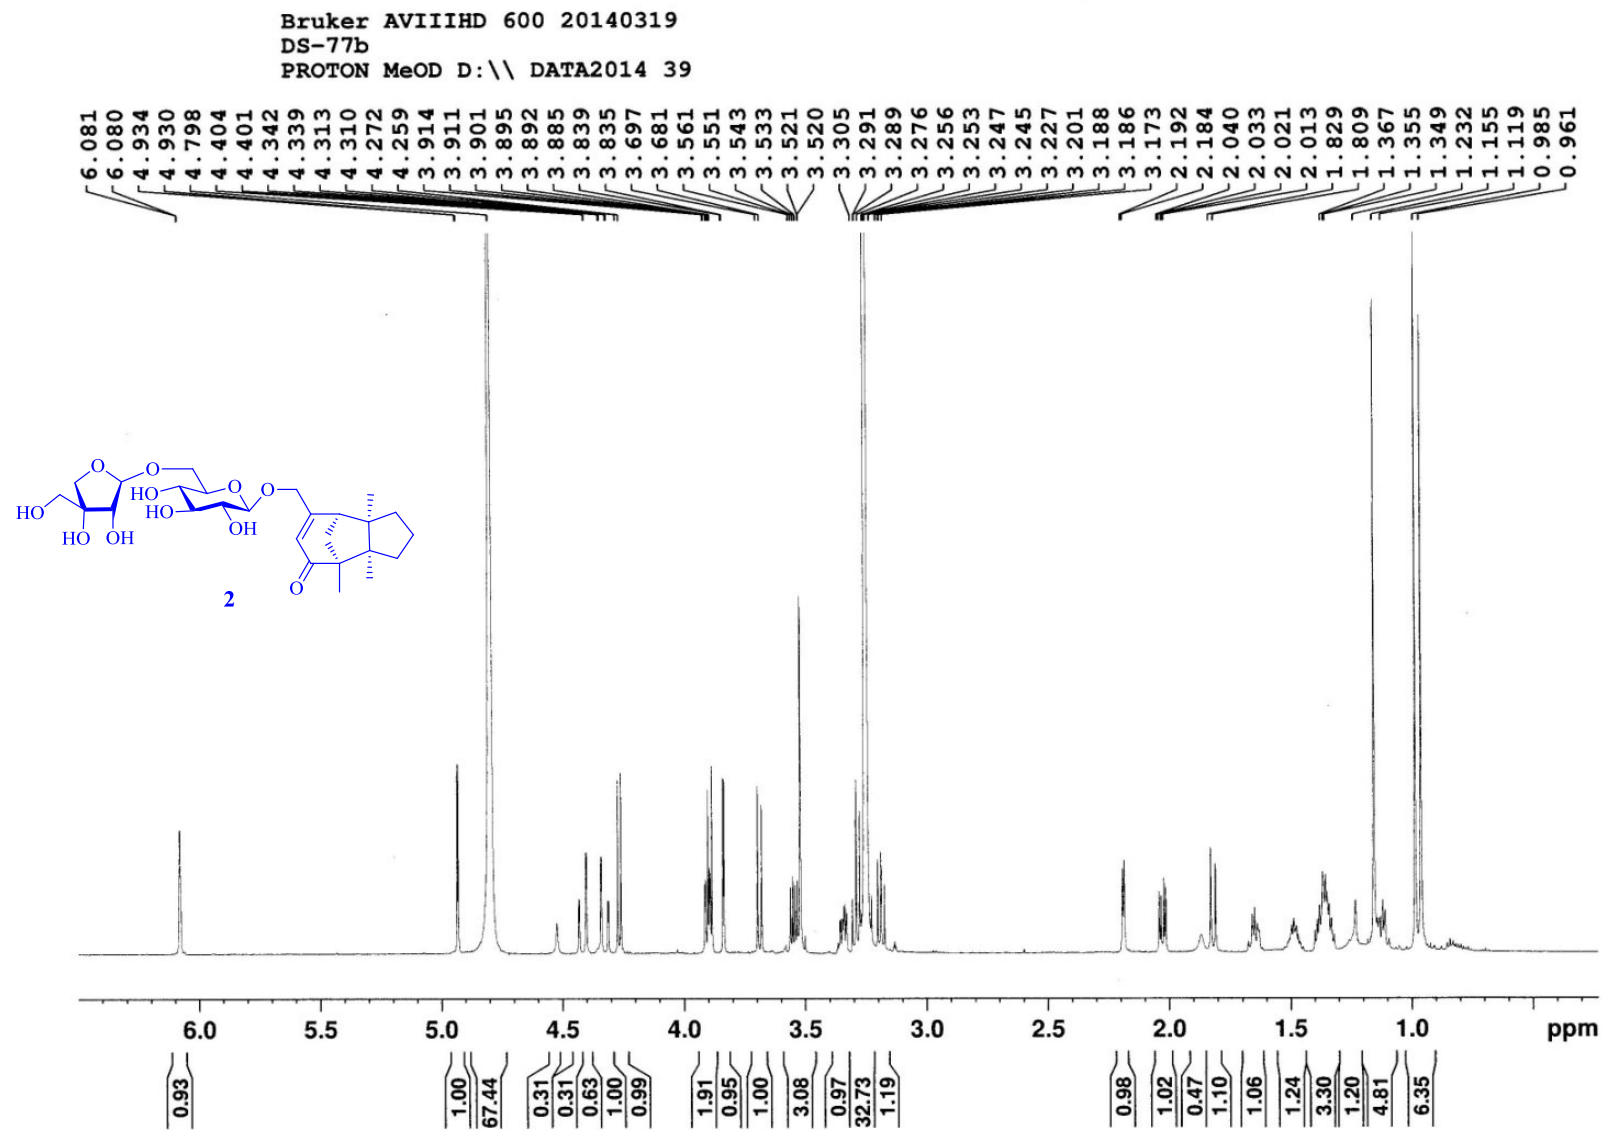

Figure S34. The  $^1\text{H}$  NMR spectrum of compound **2** in  $\text{MeOH-}d_4$  (600 MHz).



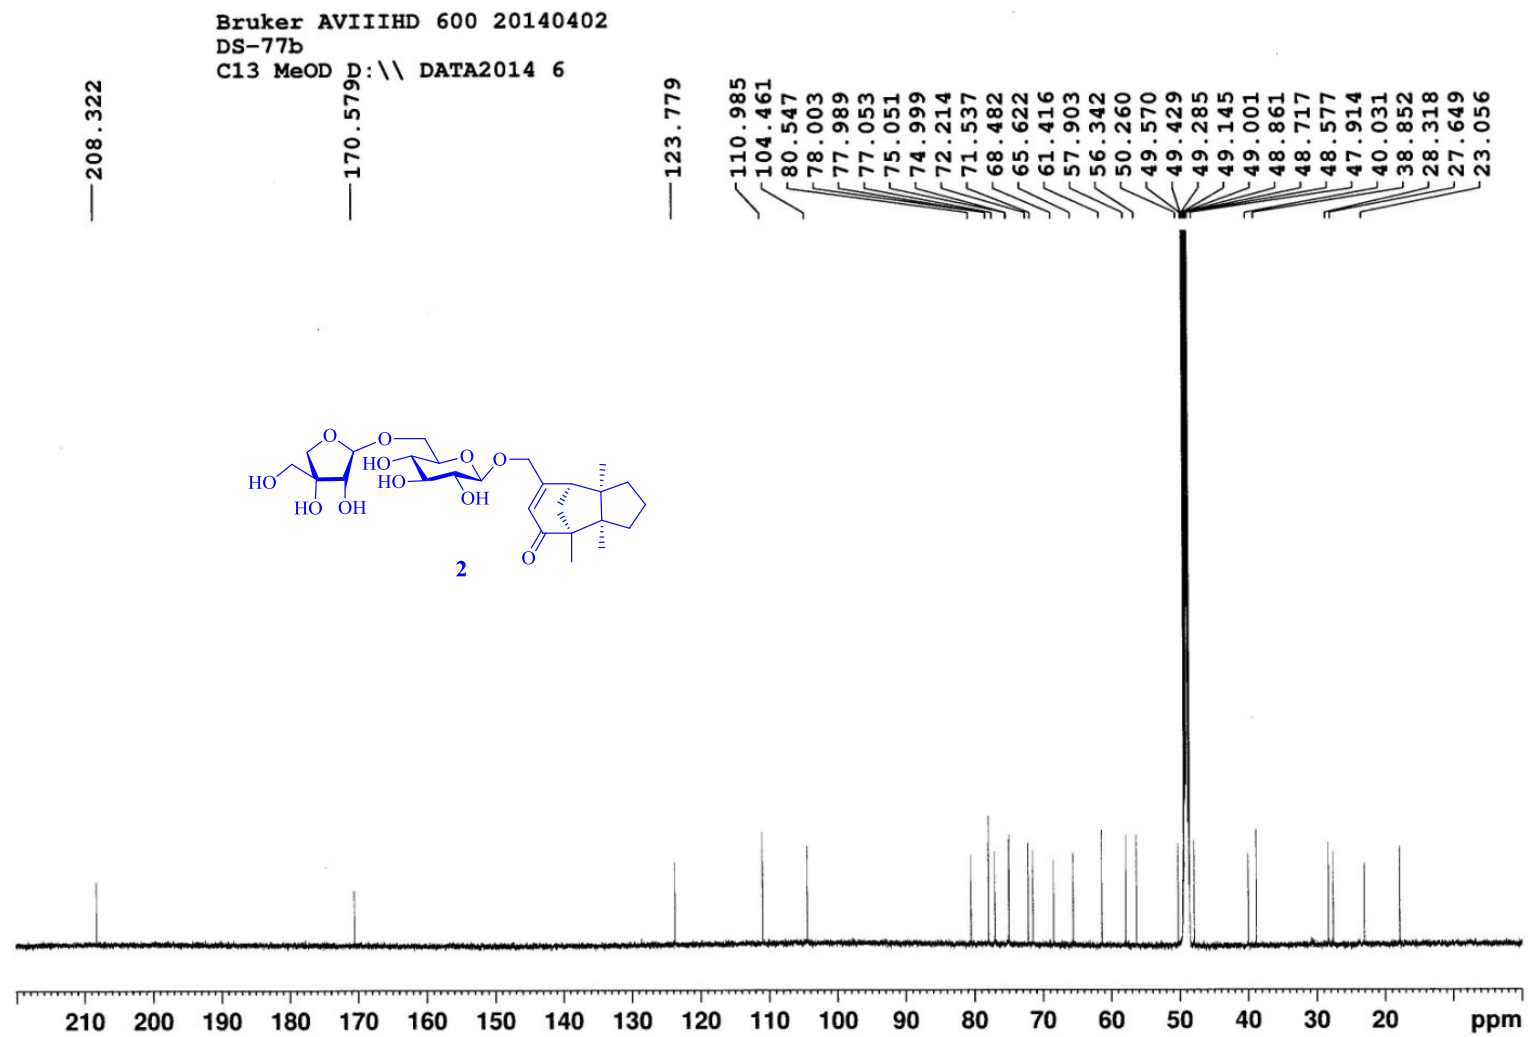

Figure S35. The  $^{13}\text{C}$  NMR spectrum of compound **2** in  $\text{MeOH-}d_4$  (150MHz).

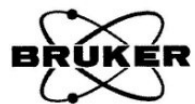

Bruker AVIIIHD 600 20140402  
DS-77b DEPT MeOD D:\\ DATA2014 6

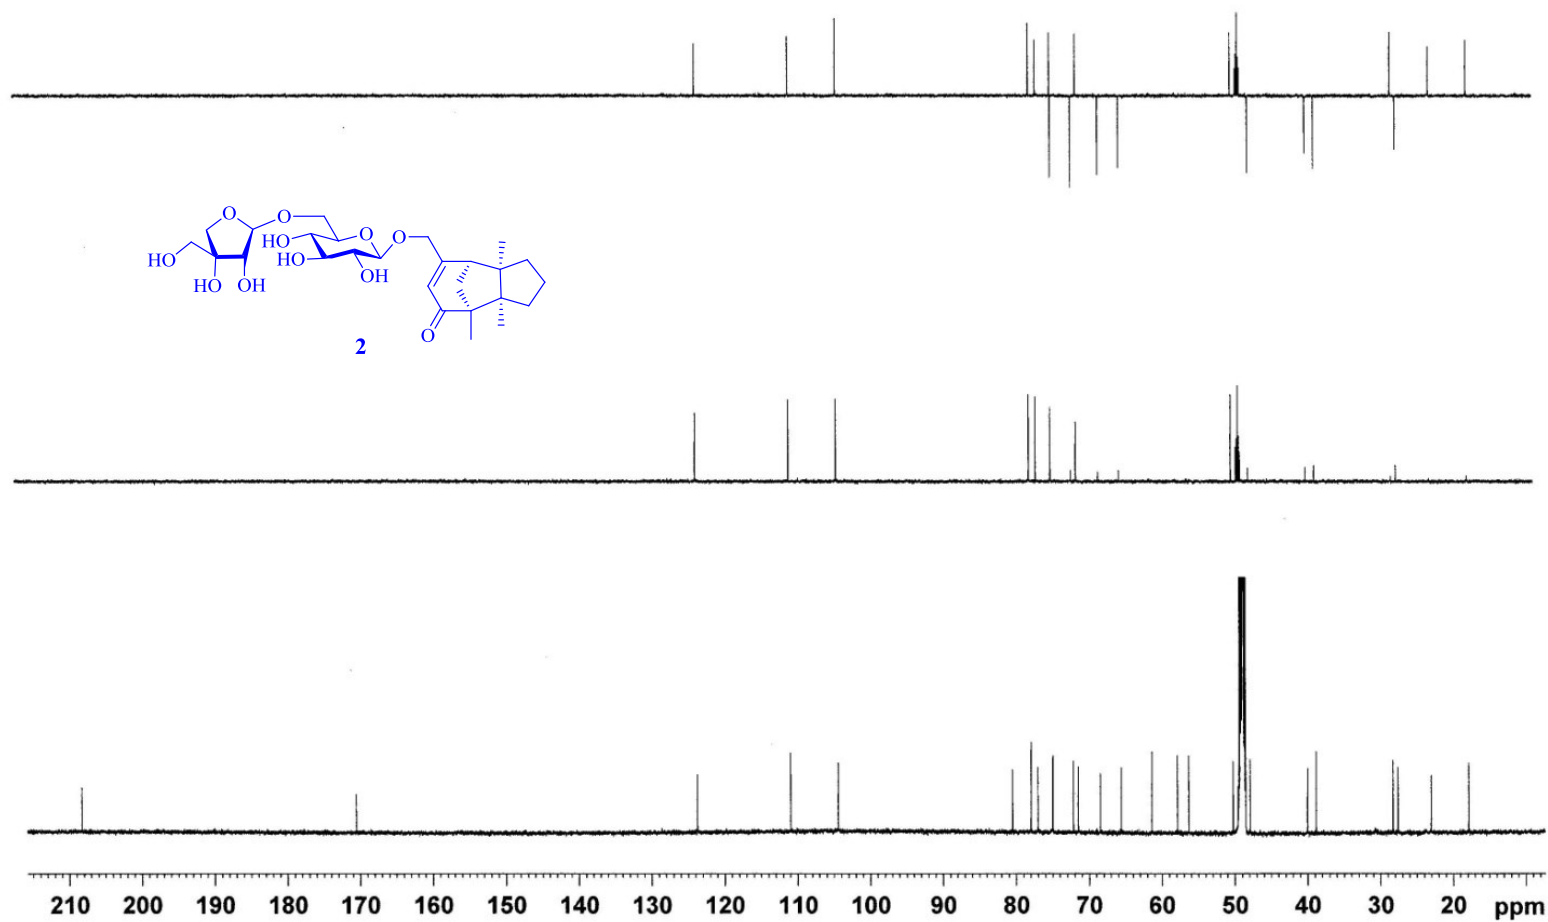

Figure S36. The DEPT spectrum of compound 2 in MeOH-*d*<sub>4</sub> (150 MHz).

Bruker AVIIIHD 600 20140404  
 DS-77b  
 {H-H COSY} MeOD D:\ DATA2014 10

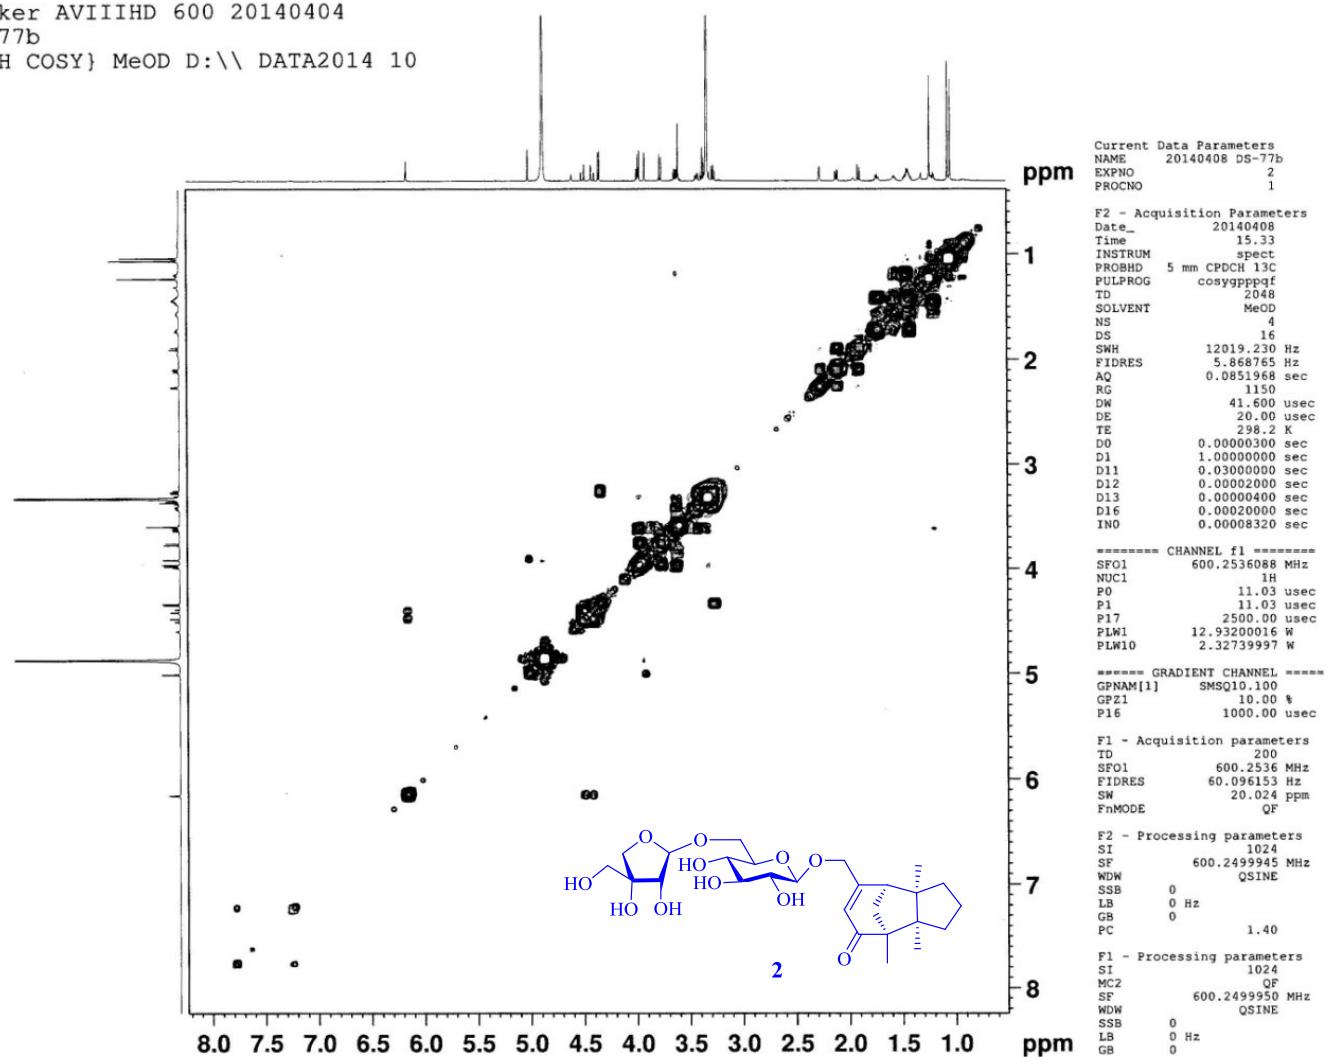

Figure S37. The <sup>1</sup>H-<sup>1</sup>H COSY spectrum of compound 2 in MeOH-d<sub>4</sub> (600 MHz).

Bruker AVIIIHD 600 20140404  
 DS-77b  
 HSQC MeOD D:\ DATA2014 10

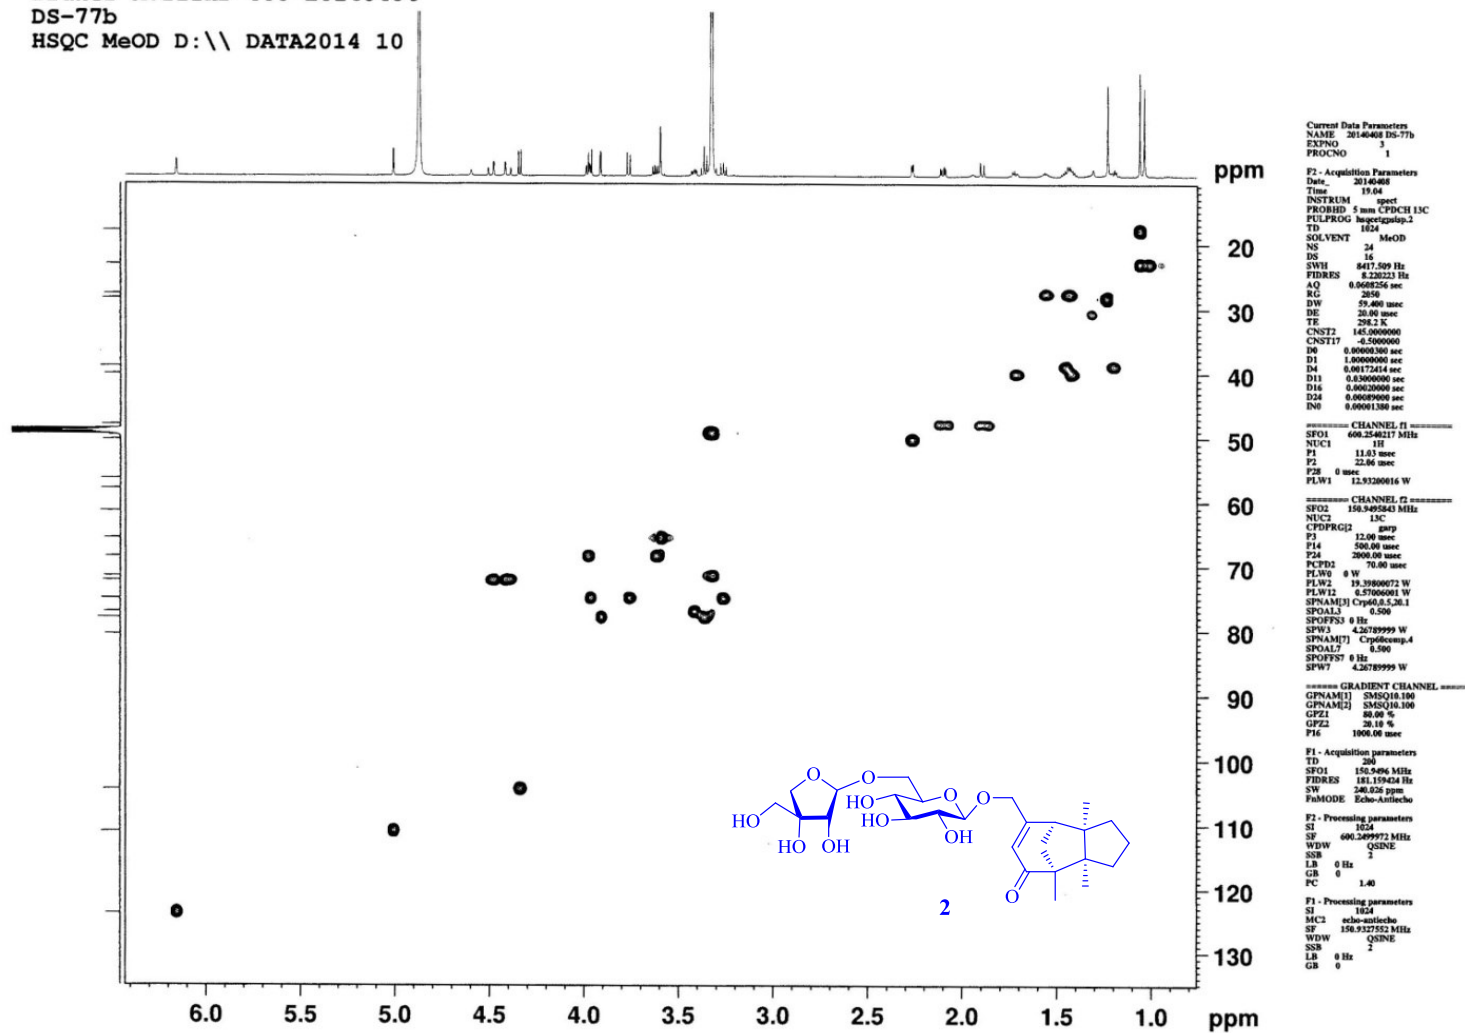

Figure S38. The HSQC spectrum of compound 2 in MeOH- $d_4$  (600 MHz for  $^1\text{H}$ ).

Bruker AVIIIHD 600 20140404  
 DS-77b  
 HMBC MeOD D:\ DATA2014 10

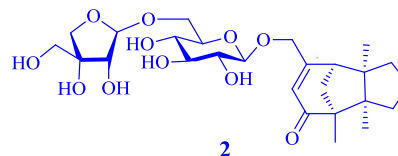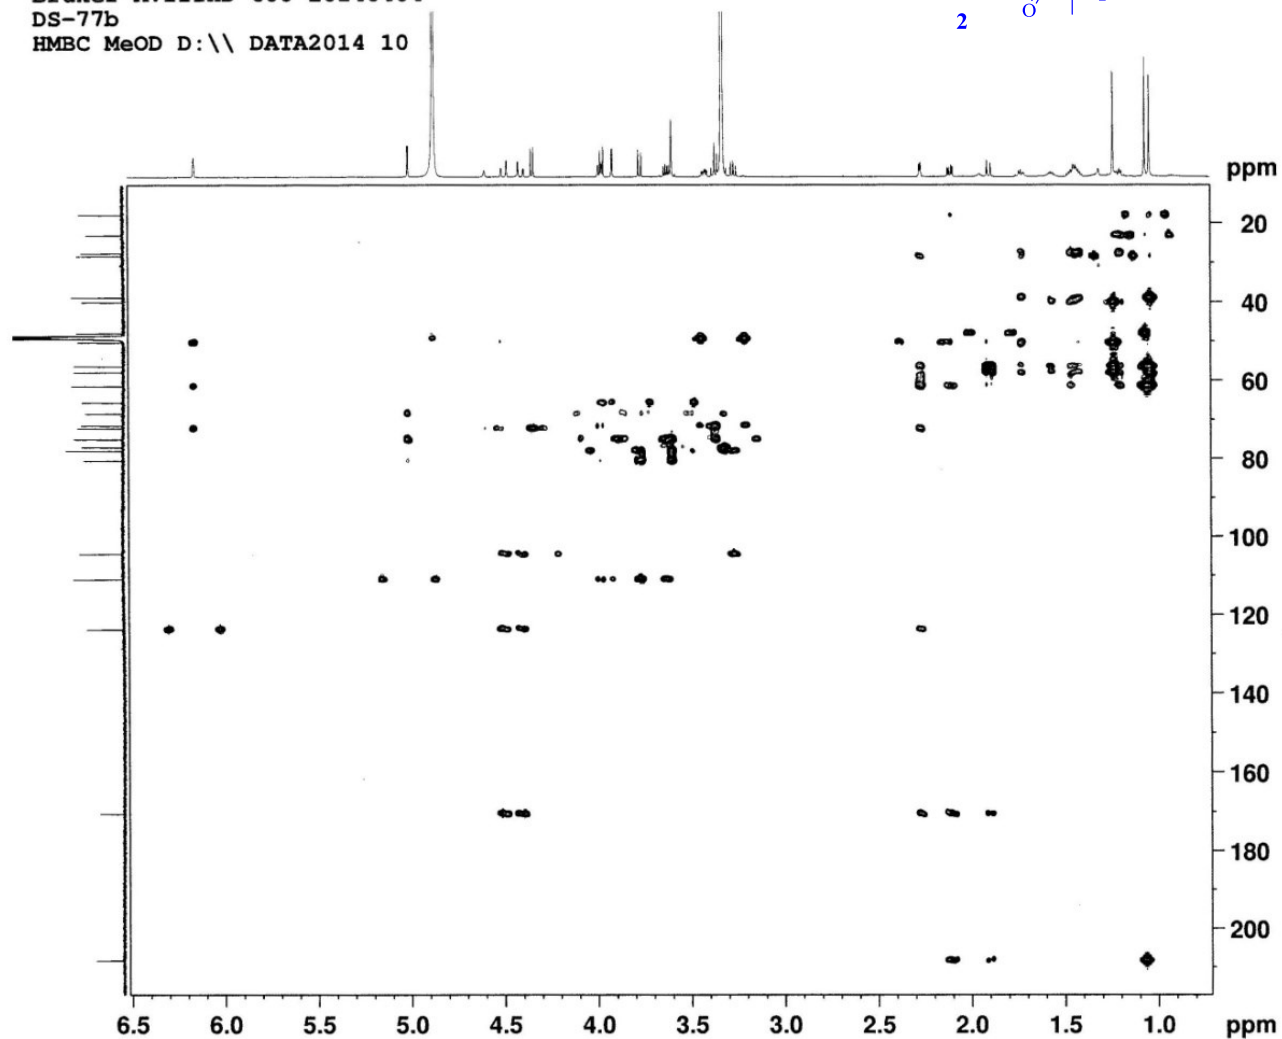

```

Current Data Parameters
NAME 20140408 DS-77b
EXPNO 1
PROCNO 1

F2 - Acquisition Parameters
Date_ 20140408
Time 20.32
INSTRUM spect
PROBHD 5 mm CPDCH 13C
PULPROG hmcgprsdqf
TD 4096
SOLVENT MeOD
NS 48
DS 16
SWH 8417.509 Hz
FIDRES 2.055056 Hz
AQ 0.2433024 sec
RG 2050
DW 59.400 usec
DE 20.00 usec
TE 298.2 K
CNST13 8.0000000
D0 0.00000300 sec
D1 1.00000000 sec
D6 0.06250000 sec
D16 0.00020000 sec
IN0 0.00001300 sec

===== CHANNEL f1 =====
SFO1 600.2536088 MHz
NUC1 1H
P1 11.03 usec
P2 22.06 usec
PLW1 12.93200016 W

===== CHANNEL f2 =====
SFO2 150.9495843 MHz
NUC2 13C
P3 12.00 usec
PLW2 19.39800072 W

===== GRADIENT CHANNEL =====
GPNAM[1] SMSQ10.100
GPNAM[2] SMSQ10.100
GPNAM[3] SMSQ10.100
GPZ1 50.00 %
GPZ2 30.00 %
GPZ3 40.10 %
P16 1000.00 usec

F1 - Acquisition parameters
TD 200
SFO1 150.9496 MHz
FIDRES 181.159424 Hz
SW 240.026 ppm
PaMODE QF

F2 - Processing parameters
SI 1024
SF 600.2499981 MHz
WDW SINE
SSB 0
LB 0 Hz
GB 0
PC 1.40

F1 - Processing parameters
SI 1024
MC2 QF
SF 150.937508 MHz
WDW SINE
SSB 0
LB 0 Hz
GB 0
  
```

Figure S39. The HMBC spectrum of compound 2 in MeOH- $d_4$  (600 MHz for  $^1\text{H}$ ).

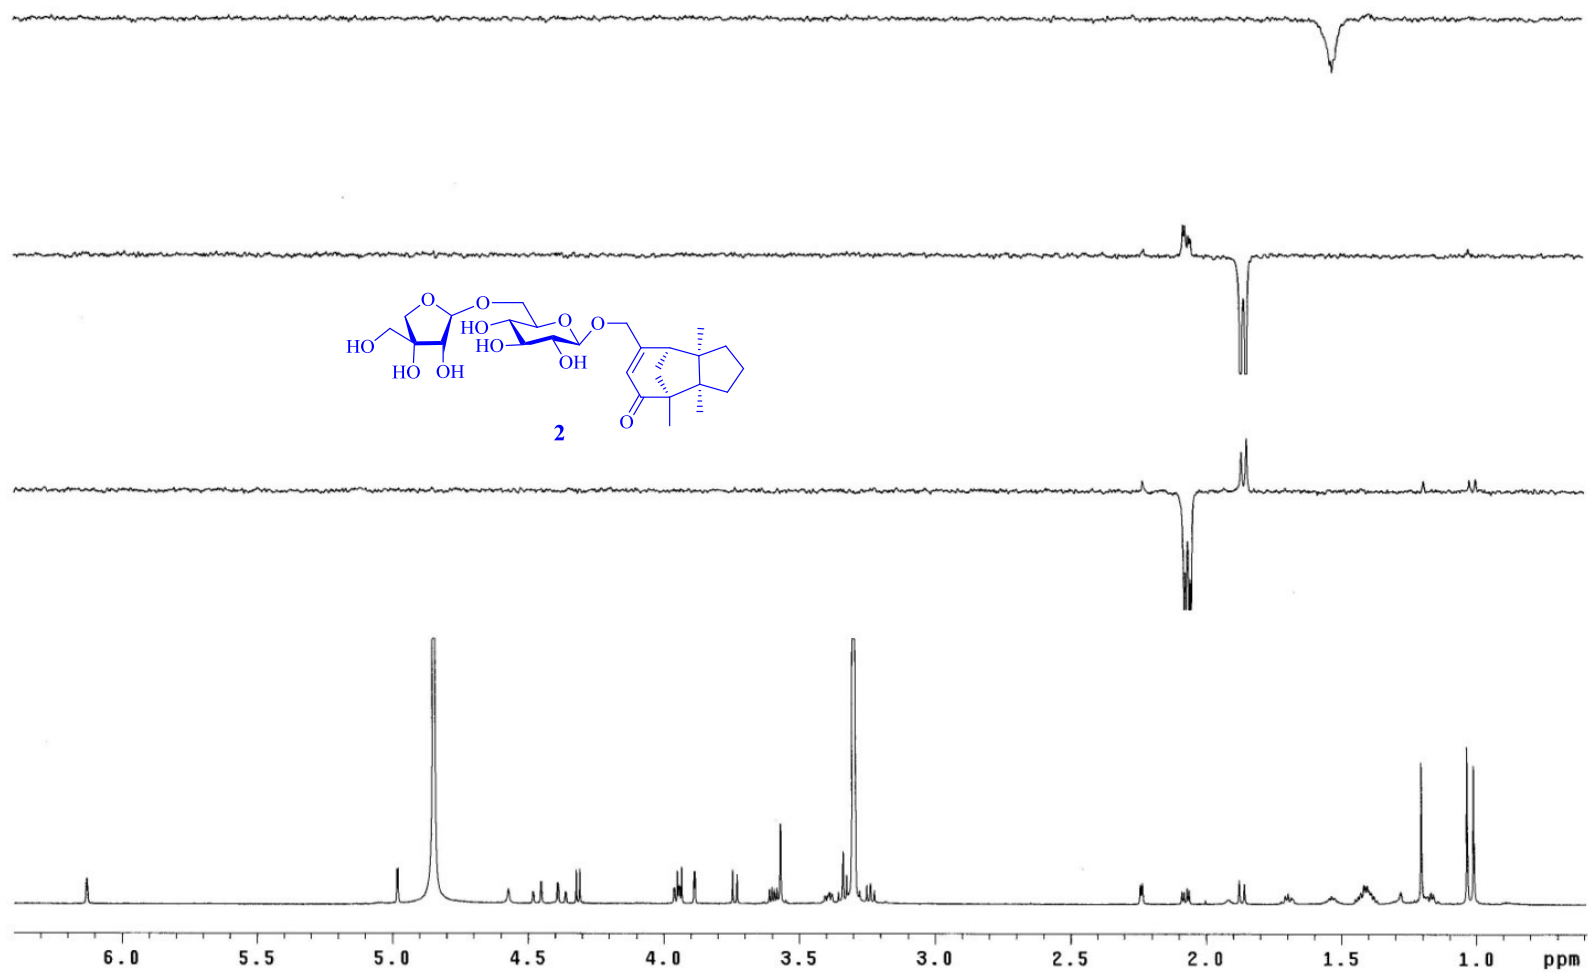

Figure S40. The NOE difference spectrum of 2 in MeOH- $d_4$  (600 MHz).

Bruker AVIIIHD 600 20141102  
 PROTON Acetone D:\\ DATA2014 7

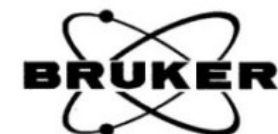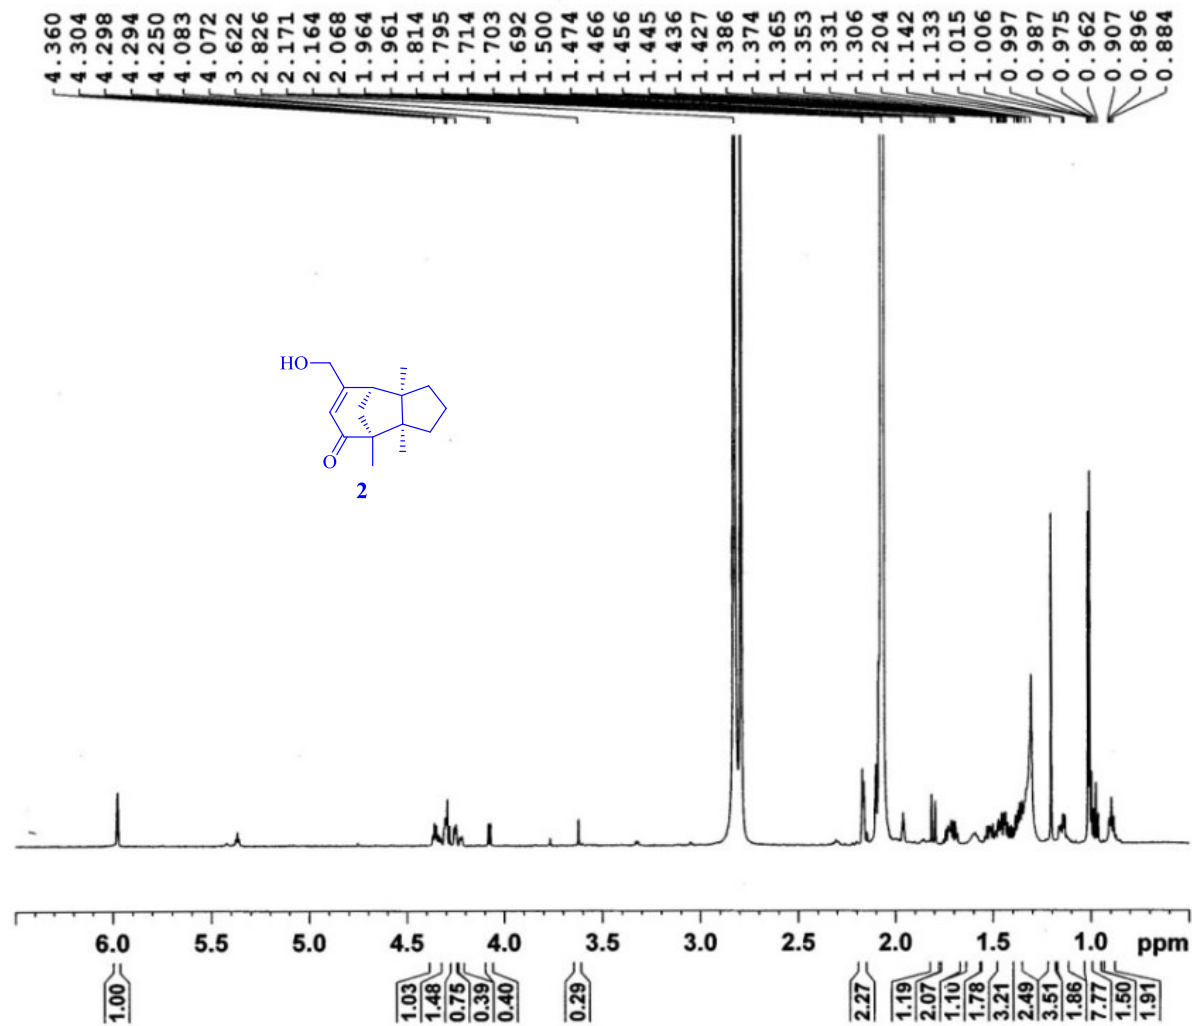

NAME 20141103 DS-77a  
 EXPNO 2  
 PROCNO 1  
 Date\_ 20141103  
 Time\_ 9.59  
 INSTRUM spect  
 PROBHD 5 mm CPDCH 13C  
 PULPROG zg30  
 TD 65536  
 SOLVENT Acetone  
 NS 32  
 DS 2  
 SWH 12019.230 Hz  
 FIDRES 0.183399 Hz  
 AQ 2.7263477 sec  
 RG 50.8  
 DW 41.600 usec  
 DE 20.00 usec  
 TE 298.2 K  
 D1 1.00000000 sec  
 TD0 2

----- CHANNEL f1 -----  
 SF01 600.2537068 MHz  
 NUC1 1H  
 P1 11.50 usec  
 SI 65536  
 SF 600.2500000 MHz  
 WDW EM  
 SSB 0  
 LB 0.30 Hz  
 GB 0  
 PC 1.00

Figure S41. The <sup>1</sup>H NMR spectrum of the aglycone of 2 in MeOH-*d*<sub>4</sub> (600 MHz).

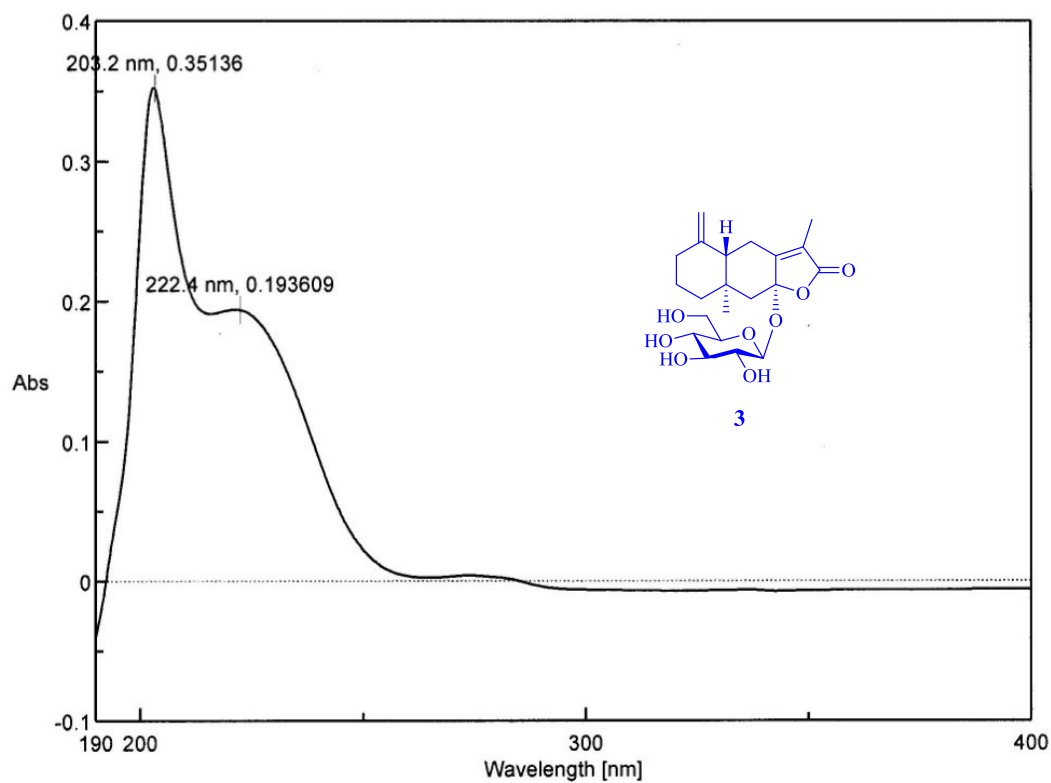

[Comment]  
 Sample Name DBT  
 Comment 0.02  
 User  
 Division UV  
 324  
 [Measurement Information]  
 Instrument Name V-650  
 Model Name V-650  
 Serial No. A034461150

DS-135

Accessory PSC-718  
 Accessory S/N A001761114  
 Position 1  
 Cell Length 10 mm  
 Temperature 19.94 C  
 Control Sensor Holder  
 Monitor Sensor Holder  
 Start Mode Start immediately

[Data Information]  
 Creation Date 2014-6-10 19:21  
 Data array type Linear data array  
 Horizontal Wavelength [nm]  
 Vertical Abs  
 Start 400 nm  
 End 190 nm  
 Data pitch 0.2 nm  
 Data points 1051

Photometric Mode Abs  
 Measurement range 400 - 190 nm  
 Data pitch 0.2 nm  
 Band width(UV/Vis) 2.0 nm  
 Response Medium  
 Scanning speed 200 nm/min  
 Source Change 340 nm  
 Light Source D2/WI  
 Filter Exchange Step  
 Correction Baseline

Figure S42. The UV spectrum of compound 3 in MeOH.



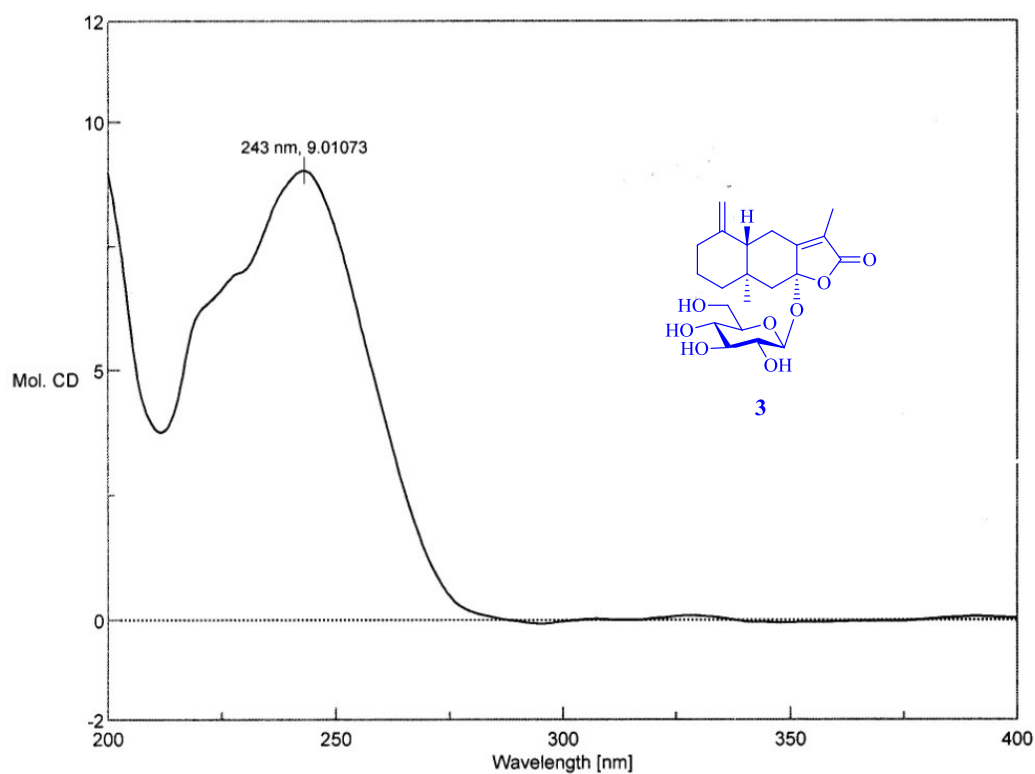

[Comments]  
 Sample name DS-135  
 Comment  
 User  
 Division  
 Company dell

[Measurement Information]  
 Instrument Name J-815  
 Model Name J-815  
 Serial No. A024461168

Accessory Standard  
 Accessory S/N A024461168  
 Cell Length 1 mm

Photometric Mode CD, HT, Abs  
 Measure Range 400 - 200 nm  
 Data pitch 0.5 nm  
 Sensitivity Standard  
 D.I.T. 2 sec  
 Band width 2.00 nm  
 Start Mode Immediately  
 Scanning Speed 100 nm/min  
 Baseline Correction Baseline  
 Shutter Control Auto  
 PMT Voltage Auto  
 Accumulations 3  
 Solvent MEOH  
 Concentration 0.2462 (w/v)%

[Detailed Information]  
 Creation date 2014-6-20 11:11

Data array type Linear data array \* 3  
 Horizontal axis Wavelength [nm]  
 Vertical axis(1) Mol. CD  
 Vertical axis(2) HT [V]  
 Vertical axis(3) Abs  
 Start 400 nm  
 End 200 nm  
 Data interval 0.5 nm  
 Data points 401

Figure S43. The CD spectrum of compound 3 in MeOH.

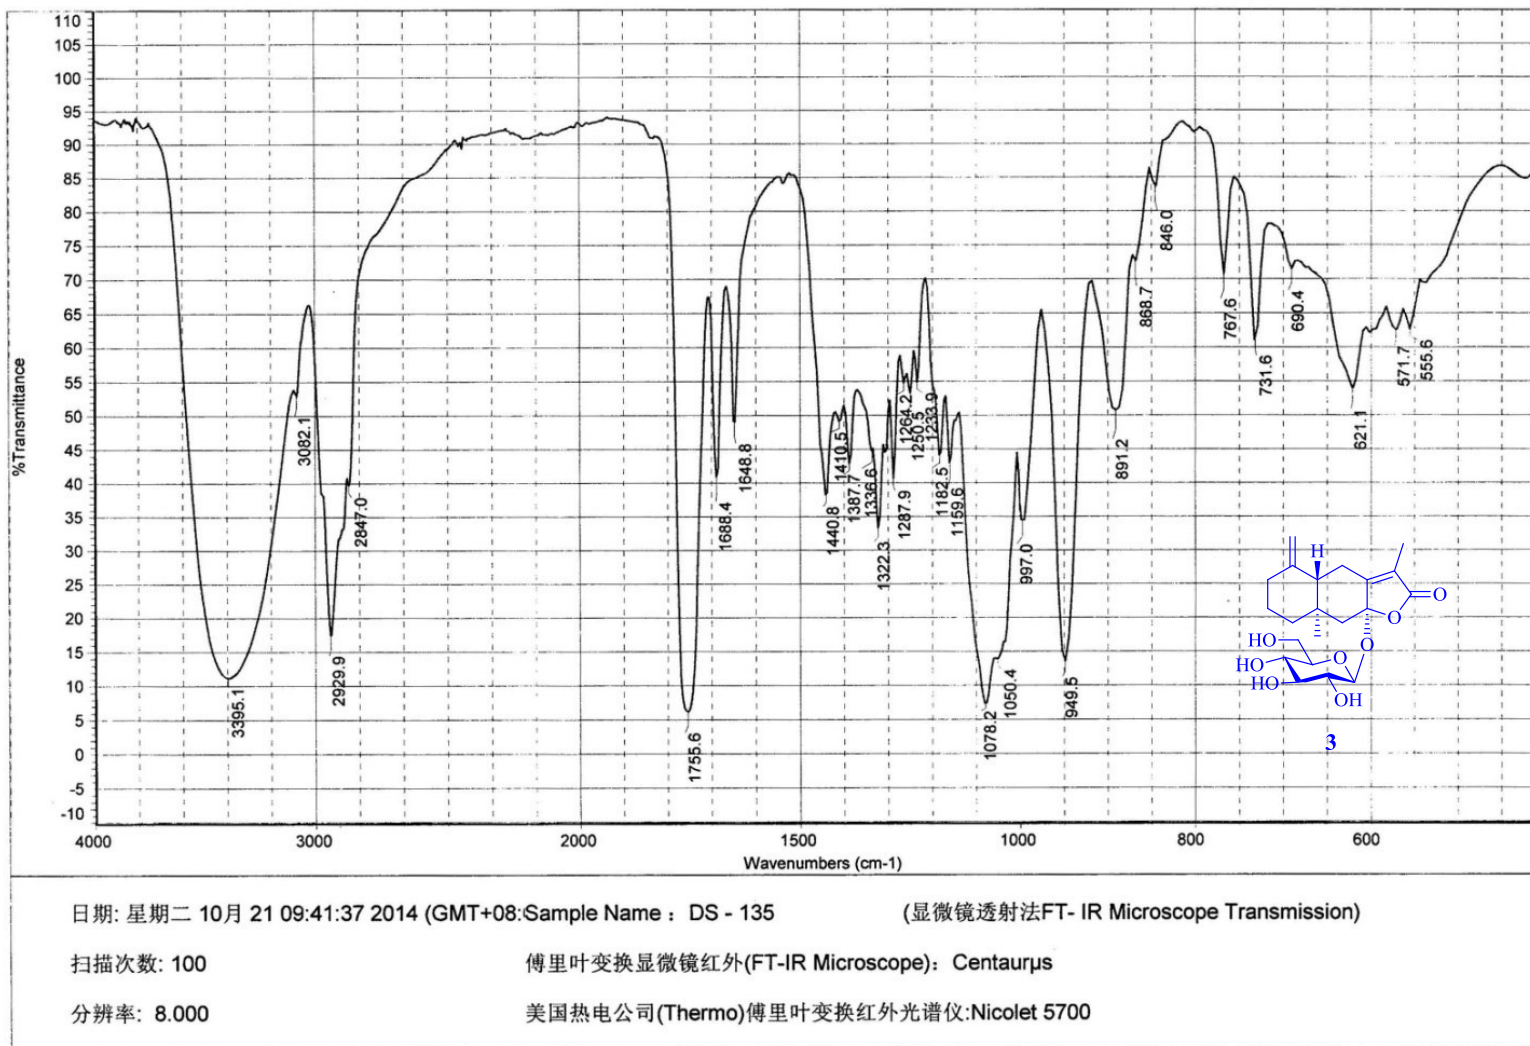

Figure S44. The IR spectrum of compound 3.

# Single Mass Spectrum Deconvolution Report

**Analysis Name:** jngyp173.d     **Instrument:** LC-MSD-Trap-SL     **Print Date:** 6/27/2014 3:31:53 PM  
**Method:** TEST.MS     **Operator:** Operator     **Acq. Date:** 6/27/2014 2:26:26 PM  
**Sample Name:** DS-135  
**Analysis Info:**

## Acquisition Parameter:

|                 |            |                       |            |                |           |
|-----------------|------------|-----------------------|------------|----------------|-----------|
| Mass Range Mode | Std/Normal | Trap Drive            | 36.3       | Scan Begin     | 200 m/z   |
| Ion Polarity    | Positive   | Octopole RF Amplitude | 171.0 Vpp  | Scan End       | 600 m/z   |
| Ion Source Type | ESI        | Capillary Exit        | 121.0 Volt | Averages       | 5 Spectra |
| Dry Temp (Set)  | 330 °C     | Skimmer               | 40.0 Volt  | Max. Accu Time | 200000 µs |
| Nebulizer (Set) | 15.00 psi  | Oct 1 DC              | 12.00 Volt | ICC Target     | 20000     |
| Dry Gas (Set)   | 6.00 l/min | Oct 2 DC              | 1.70 Volt  | Charge Control | on        |

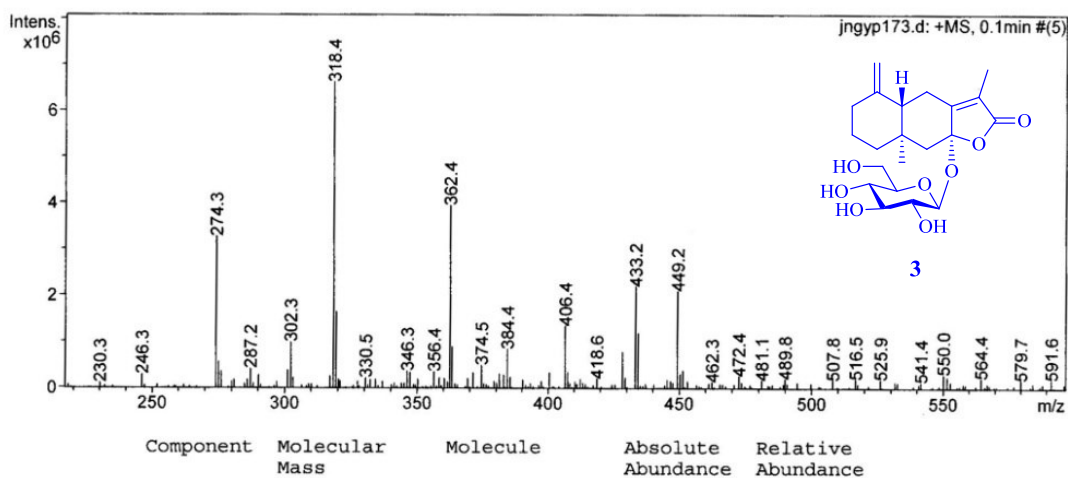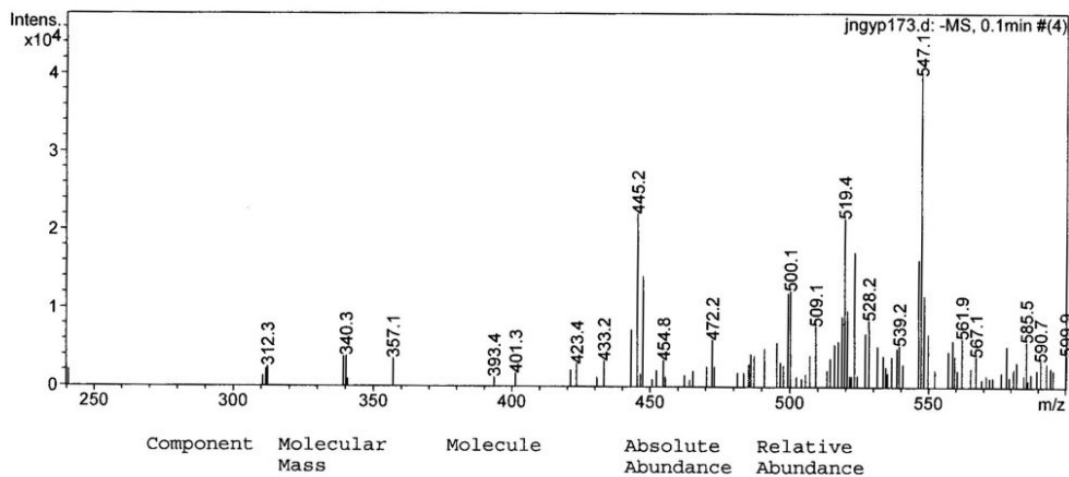

Figure S45. The ESI mass spectra of Compound 3.

# Qualitative Analysis Report

|                 |              |                        |         |
|-----------------|--------------|------------------------|---------|
| Data Filename   | 2014060901.d | Sample Name            | DS-135  |
| Sample Type     | Sample       | Position               | P1-C2   |
| Instrument Name | Instrument 1 | User Name              |         |
| Acq Method      |              | IRM Calibration Status | Success |
| DA Method       | TEST LCMS.m  | Comment                |         |

## User Chromatograms

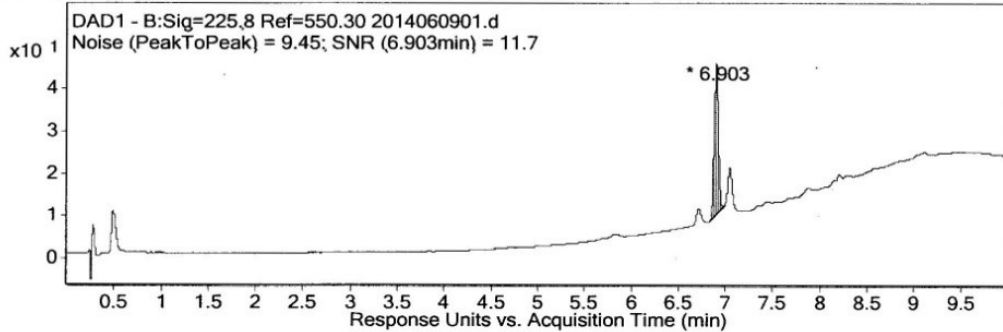

### Integration Peak List

| Peak | Start | RT    | End   | Height | Area   | Area % | Signal To Noise |
|------|-------|-------|-------|--------|--------|--------|-----------------|
| 1    | 6.833 | 6.903 | 6.992 | 35.38  | 110.59 | 100    | 11.7            |

### Noise Measurements

| Noise Type   | Signal Definition | Noise Multiplier | Noise Value |
|--------------|-------------------|------------------|-------------|
| Peak-to-Peak | Area              | 1                | 9.44852829  |

### Noise Regions

| Start | End |
|-------|-----|
| 0.5   | 1   |
| 4     | 4.3 |
| 9.99  | 11  |

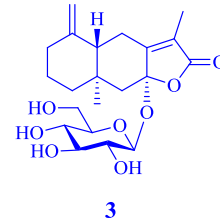

Fragmentor Voltage 135    Collision Energy 0    Ionization Mode ESI

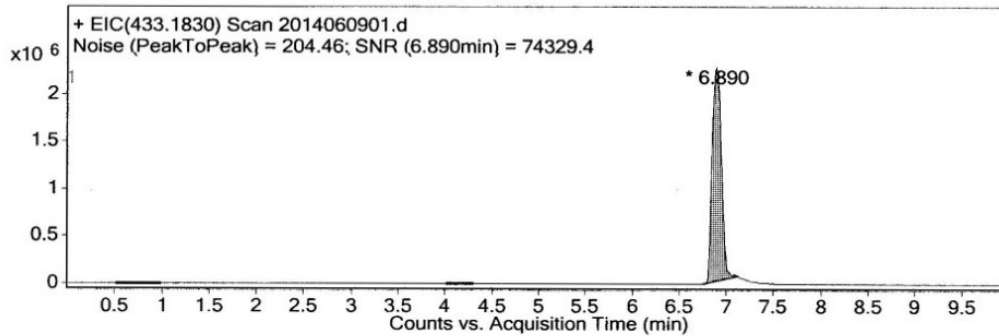

### Integration Peak List

| Peak | Start | RT   | End   | Height  | Area     | Area % | Signal To Noise |
|------|-------|------|-------|---------|----------|--------|-----------------|
| 1    | 6.745 | 6.89 | 7.132 | 2258026 | 15197083 | 100    | 74329.4         |

### Noise Measurements

| Noise Type   | Signal Definition | Noise Multiplier | Noise Value |
|--------------|-------------------|------------------|-------------|
| Peak-to-Peak | Area              | 1                | 204.4558563 |

### Noise Regions

| Start | End |
|-------|-----|
| 0.5   | 1   |
| 4     | 4.3 |
| 9.99  | 11  |

## User Spectra

Figure S46. The (+)-HR-ESI-MS report of compound 3, page 1.

# Qualitative Analysis Report

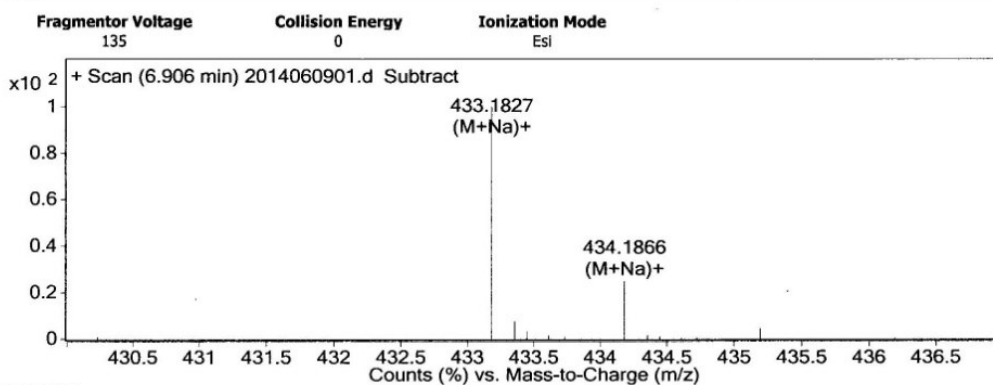

**Peak List**

| m/z      | z | Abund   | Formula       | Ion     |
|----------|---|---------|---------------|---------|
| 249.1479 |   | 119082  |               |         |
| 428.2276 |   | 405647  |               |         |
| 433.1827 | 1 | 2145478 | C21 H30 Na O8 | (M+Na)+ |
| 433.3571 |   | 157937  |               |         |
| 434.1866 | 1 | 532157  | C21 H30 Na O8 | (M+Na)+ |
| 843.3769 | 1 | 387325  |               |         |
| 844.3787 | 1 | 175409  |               |         |

**Formula Calculator Element Limits**

| Element | Min | Max |
|---------|-----|-----|
| C       | 3   | 100 |
| H       | 0   | 500 |
| O       | 0   | 90  |
| N       | 0   | 5   |
| S       | 0   | 2   |
| Cl      | 0   | 0   |
| Br      | 0   | 0   |
| Si      | 0   | 0   |
| F       | 0   | 0   |
| P       | 0   | 0   |

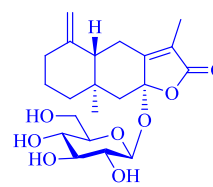

3

**Formula Calculator Results**

| Formula       | Best | Mass     | Tgt Mass | Diff (ppm) | Ion Species      | Score |
|---------------|------|----------|----------|------------|------------------|-------|
| C21 H30 O8    | TRUE | 410.1935 | 410.1941 | 1.39       | C21 H30 Na O8    | 99.91 |
| C22 H26 N4 O4 |      | 410.1935 | 410.1954 | 4.64       | C22 H26 N4 Na O4 | 99.62 |
| C25 H30 O3 S  |      | 410.1935 | 410.1916 | -4.72      | C25 H30 Na O3 S  | 98.83 |
| C22 H34 O3 S2 |      | 410.1935 | 410.1949 | 3.5        | C22 H34 Na O3 S2 | 97.38 |

--- End Of Report ---

Figure S47. The (+)-HR-ESI-MS report of compound 3, page 2.

MS Formula Results: + Scan (6.906 min) Sub (2014060901.d)

| m/z      | Ion                 | Formula       | Abundance |
|----------|---------------------|---------------|-----------|
| 433.1827 | (M+Na) <sup>+</sup> | C21 H30 Na O8 | 2145477.5 |

  

| Best                                | Formula (M)   | Ion Formula      | Calc m/z | Score | Cross S | Mass     | Calc Mass | Diff (ppm) | Abs Diff (ppm) | Abund Match | Spacing Mat | Mass Match | m/z      | DBE |
|-------------------------------------|---------------|------------------|----------|-------|---------|----------|-----------|------------|----------------|-------------|-------------|------------|----------|-----|
| <input checked="" type="checkbox"/> | C21 H30 O8    | C21 H30 Na O8    | 433.1833 | 99.91 |         | 410.1935 | 410.1941  | 1.39       | 1.39           | 99.8        | 99.96       | 99.94      | 433.1827 | 7   |
| <input type="checkbox"/>            | C22 H26 N4 O4 | C22 H26 N4 Na O4 | 433.1846 | 99.62 |         | 410.1935 | 410.1954  | 4.64       | 4.64           | 99.82       | 99.89       | 99.36      | 433.1827 | 12  |
| <input type="checkbox"/>            | C25 H30 O3 S  | C25 H30 Na O3 S  | 433.1808 | 98.83 |         | 410.1935 | 410.1916  | -4.72      | 4.72           | 97.42       | 99.54       | 99.33      | 433.1827 | 11  |
| <input type="checkbox"/>            | C22 H34 O3 S2 | C22 H34 Na O3 S2 | 433.1842 | 97.38 |         | 410.1935 | 410.1949  | 3.5        | 3.5            | 92.17       | 99.13       | 99.63      | 433.1827 | 6   |

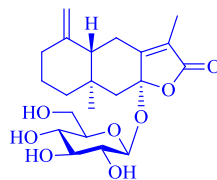

3

Figure S48. The (+)-HR-ESI-MS report of compound 3, page 3.

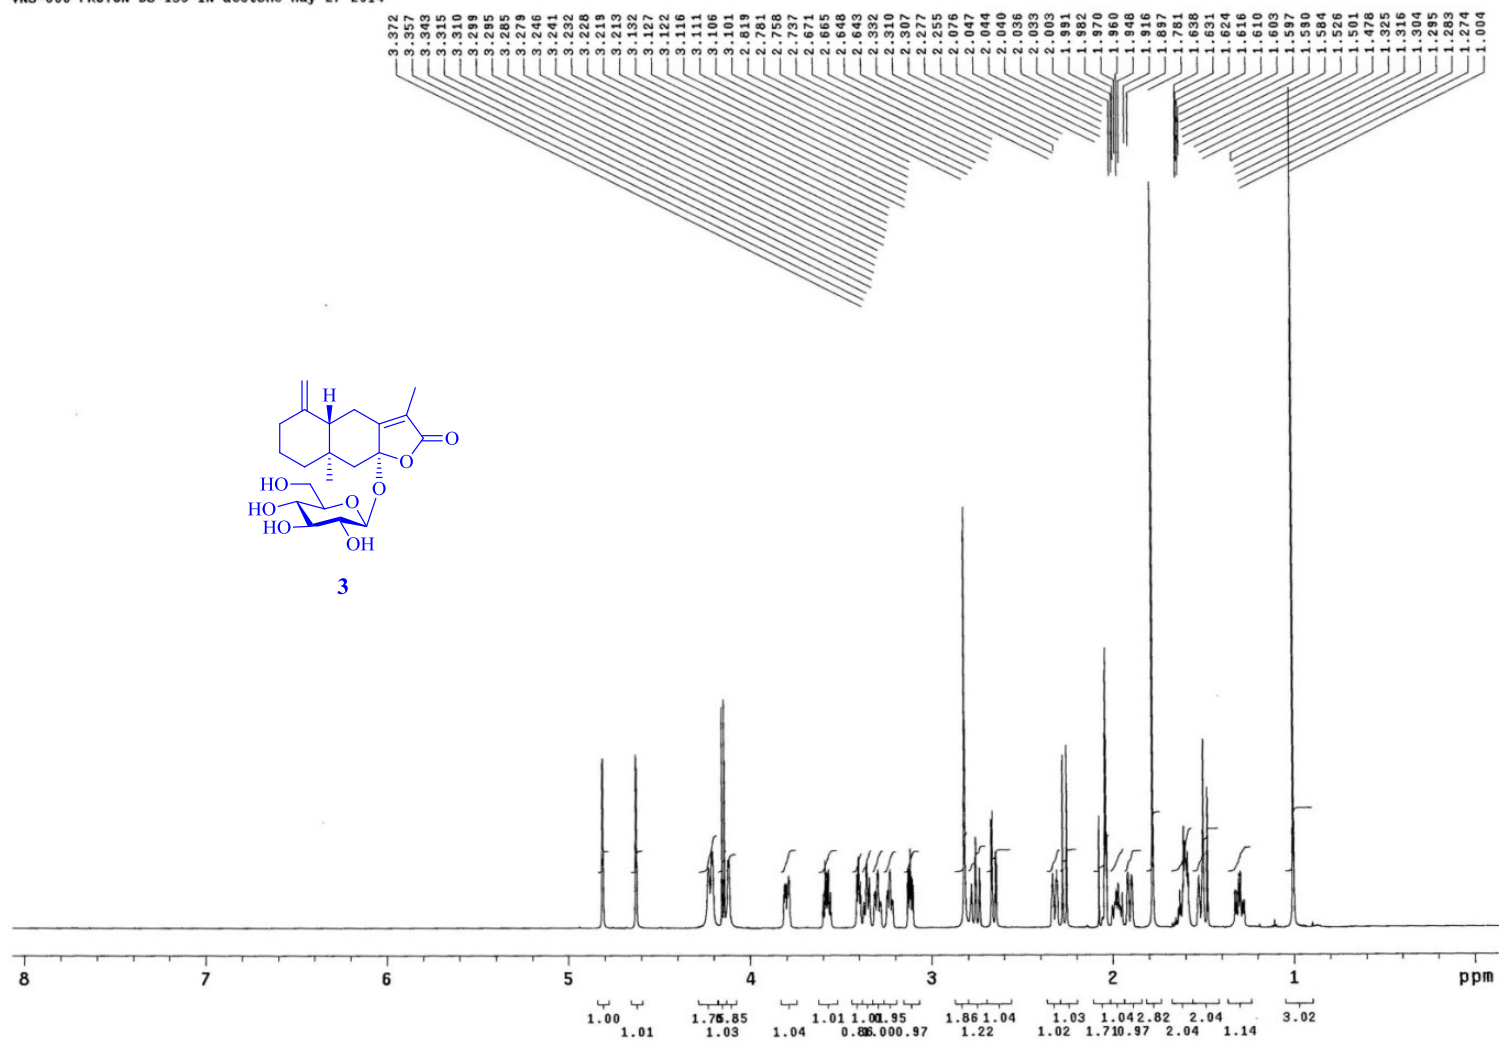

Figure S49. The <sup>1</sup>H NMR spectra of compound 3 in acetone-*d*<sub>6</sub> (600 M).

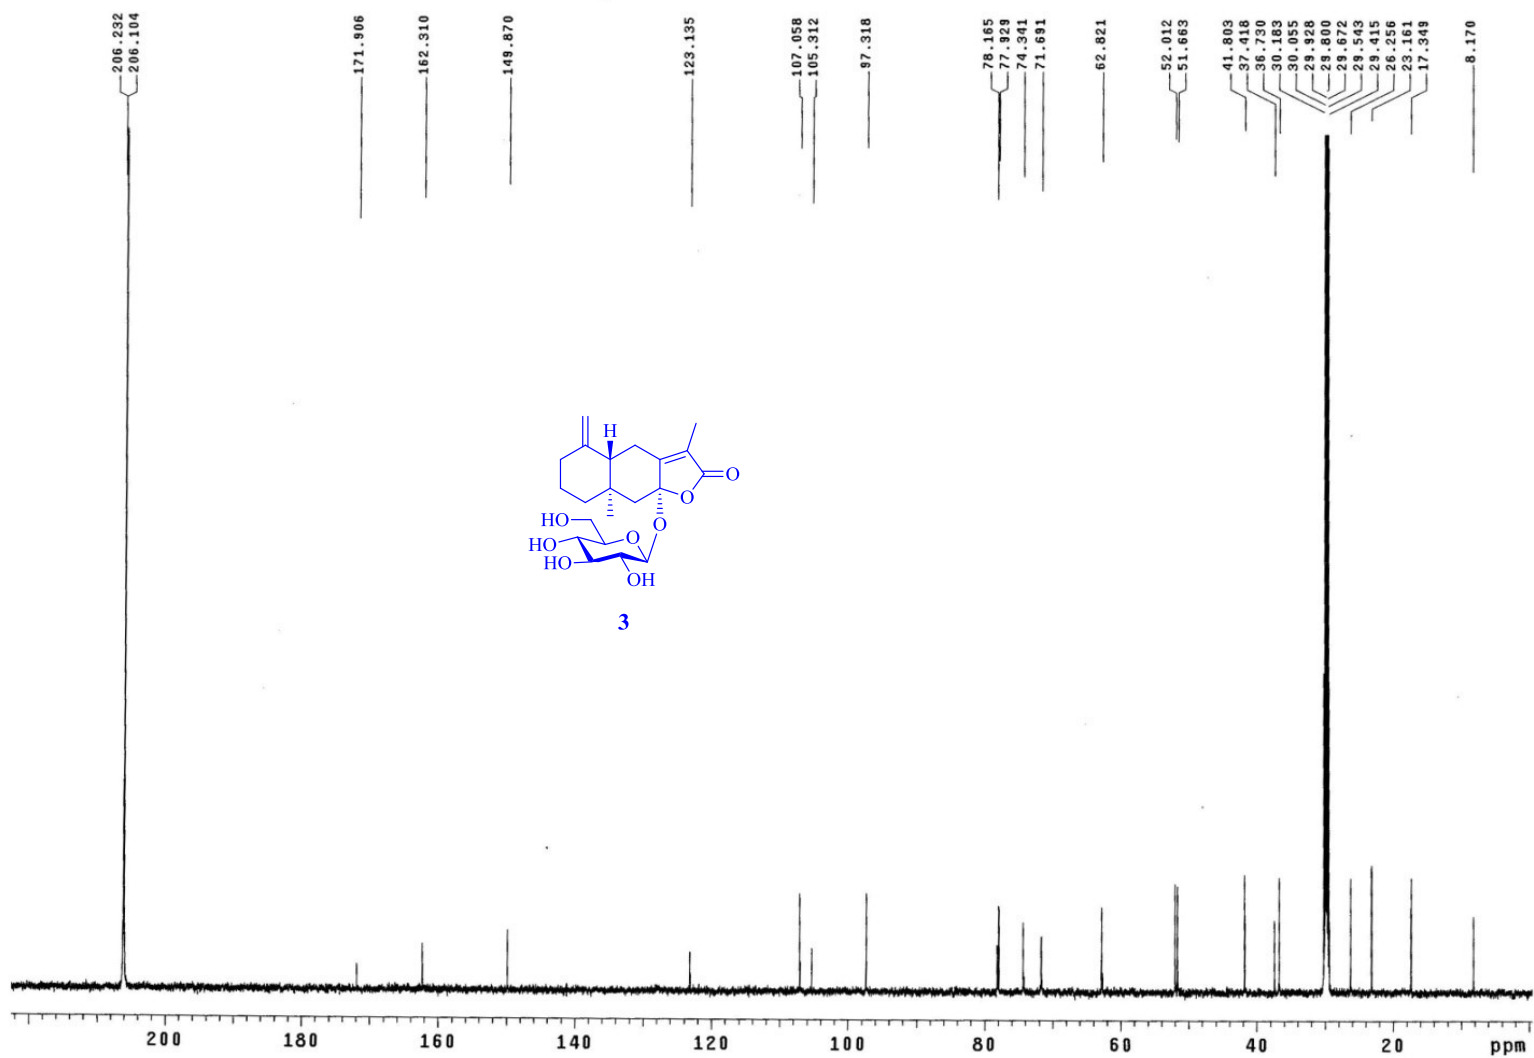

**Figure S50.** The  $^{13}\text{C}$  NMR spectrum of compound **3** in acetone- $d_6$  (150 M).



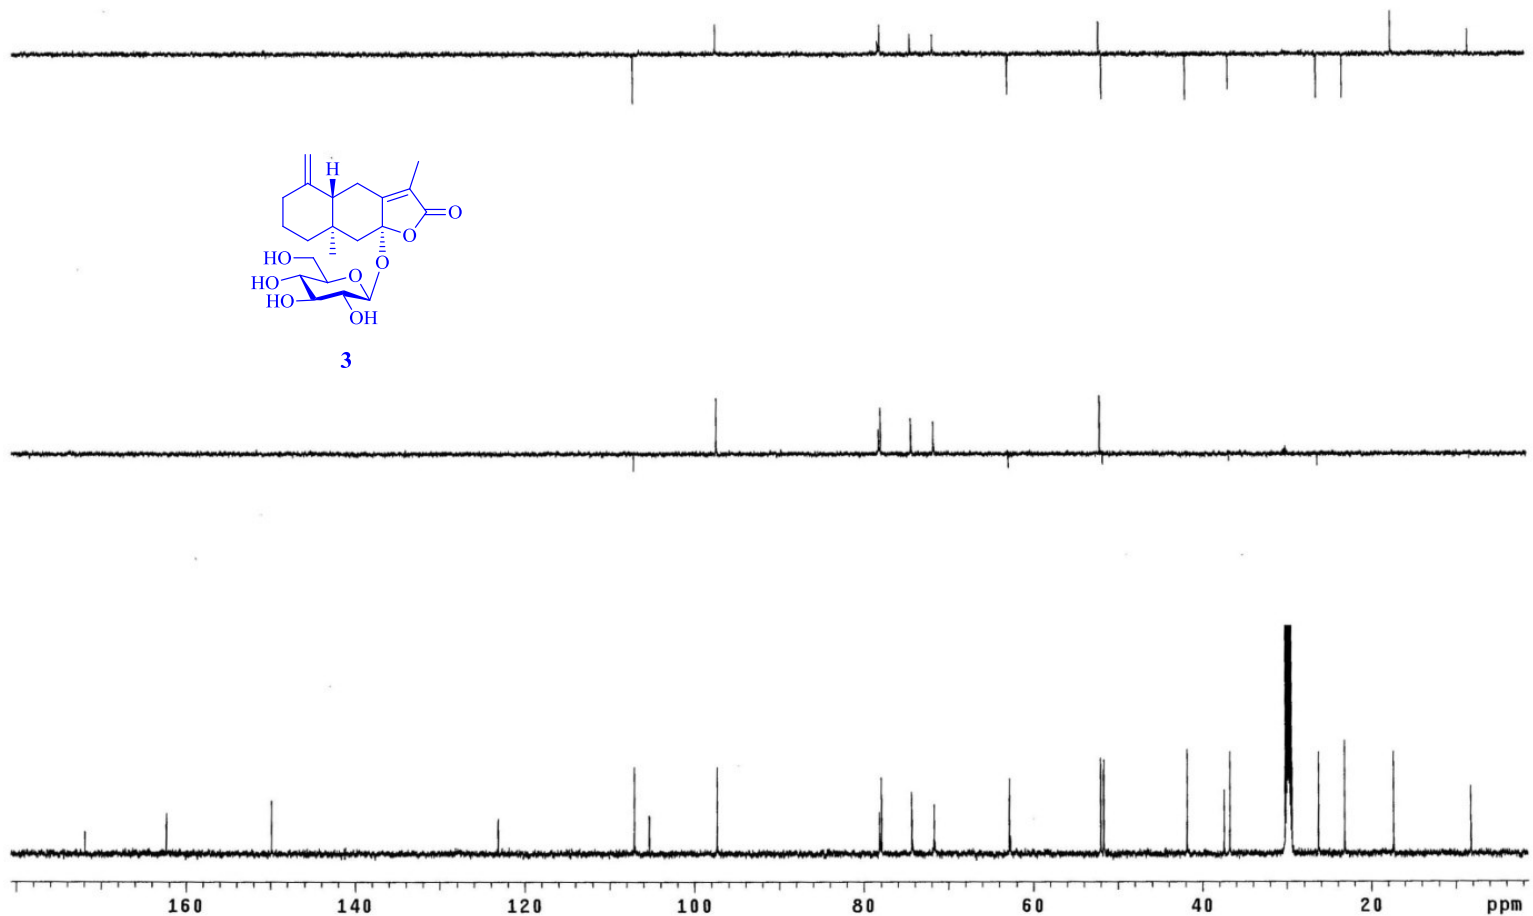

**Figure S51.** The DEPT spectra of compound **3** in acetone-*d*<sub>6</sub> (150 M).

VNS-600 gCOSY DS-135 IN acetone Jun 5 2014

Temp. 25.0 C / 298.1 K  
Sample #8, Operator: vjwalk

Relax. delay 1.000 sec  
Acq. time 0.150 sec  
Width 5364.8 Hz  
2D Width 5364.8 Hz  
2 repetitions  
200 increments  
OBSERVE H1, 599.6908008 MHz  
DATA PROCESSING  
Sq. sine bell 0.075 sec  
F1 DATA PROCESSING  
Sq. sine bell 0.021 sec  
FT size 2048 x 2048  
Total time 8 min 36 sec

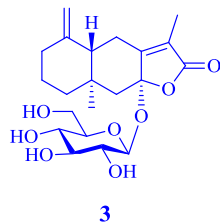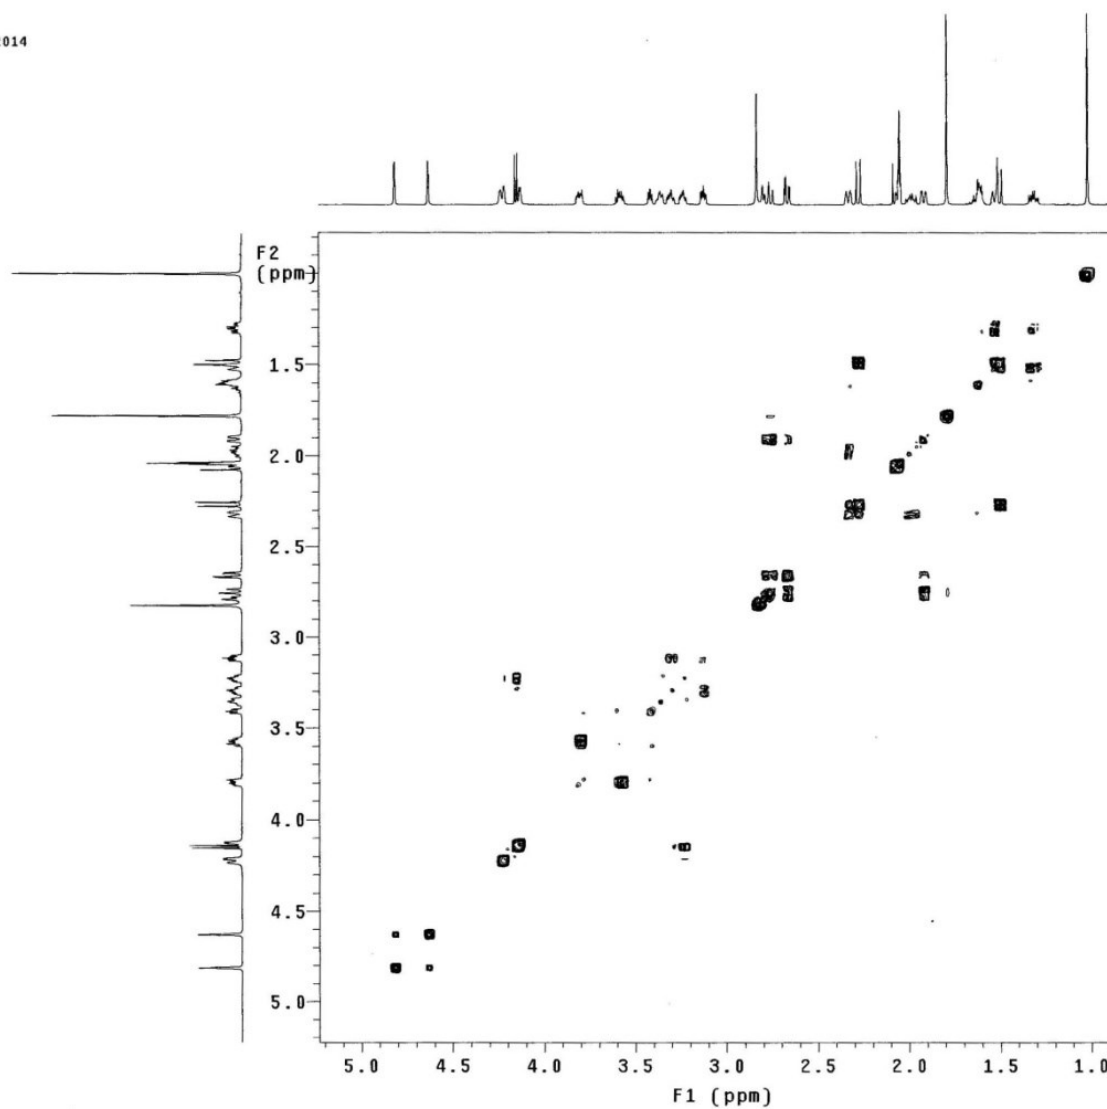

Figure S52. The  $^1\text{H}$ - $^1\text{H}$  gCOSY spectrum of compound **3** in acetone- $d_6$  (600 MHz).

VNS-600 gHSQCAD DS-135 IN acetone Jun 5 2014

Temp. 25.0 C / 298.1 K  
Sample #8, Operator: vjwalk

Relax. delay 1.000 sec  
Acq. time 0.150 sec  
Width 5364.8 Hz  
2D Width 30154.5 Hz  
12 repetitions  
140 increments  
OBSERVE H1, 599.6908056 MHz  
DECOUPLE C13, 150.8059420 MHz  
Power 36 dB  
on during acquisition  
off during delay  
W40\_NEW-SW modulated  
DATA PROCESSING  
Sine bell 0.036 sec  
F1 DATA PROCESSING  
Sine bell 0.005 sec  
FT size 4096 x 2048  
Total time 34 min

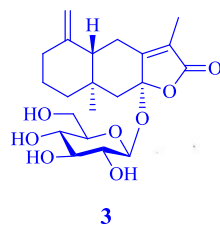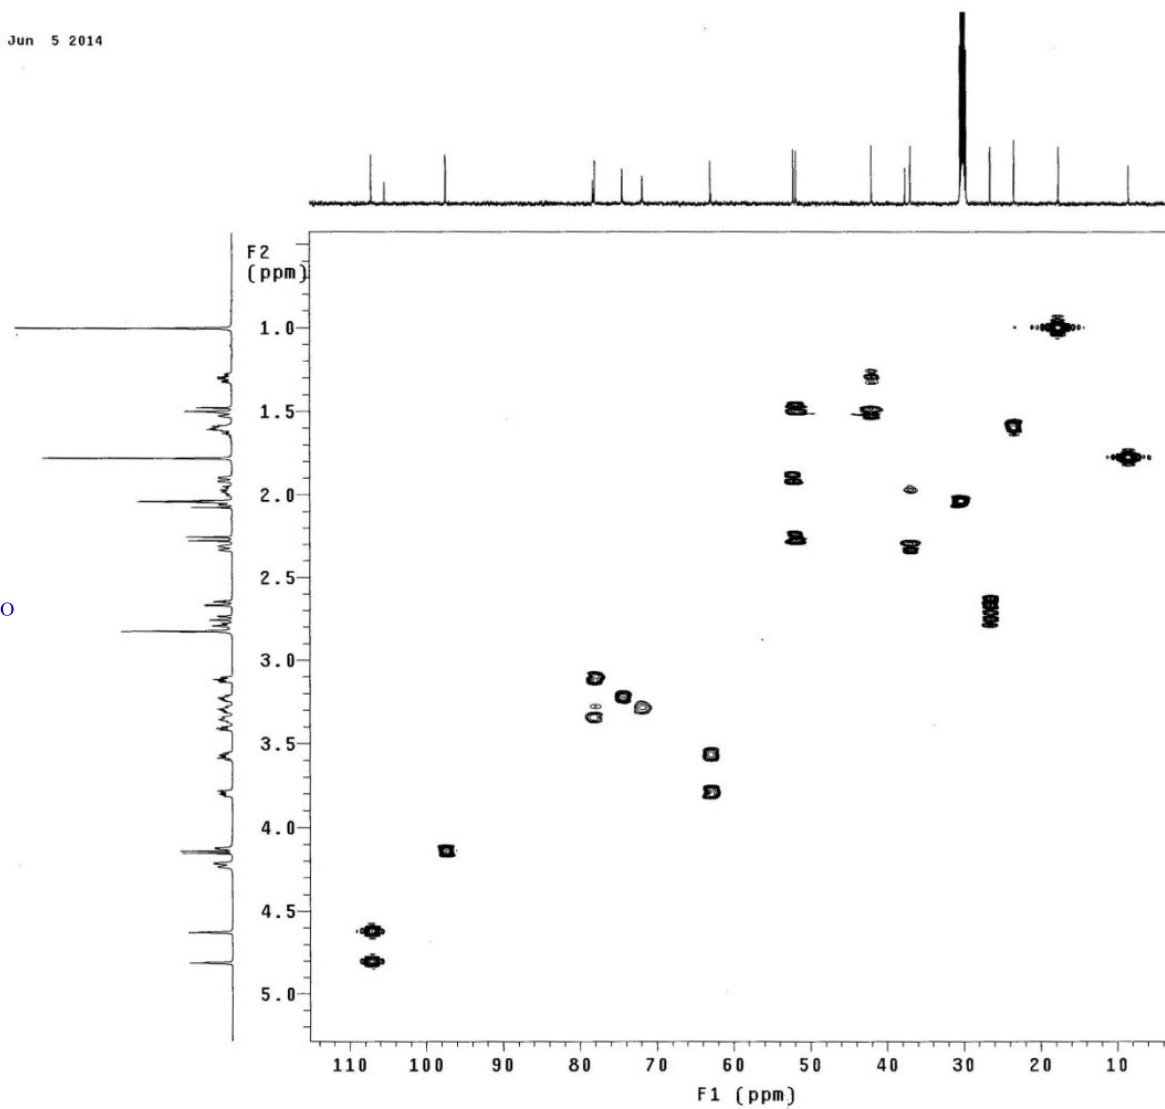

Figure S53. The gHSQC spectrum of compound **3** in acetone- $d_6$  (600 MHz for  $^1\text{H}$ ).

VNS-600 gHMBCAD DS-135 IN acetone Jun 5 2014

Temp. 25.0 C / 298.1 K  
Sample #8, Operator: vjwalk

Relax. delay 1.000 sec  
Acq. time 0.150 sec  
Width 5364.8 Hz  
2D Width 36182.7 Hz  
24 repetitions  
2 x 80 increments  
OBSERVE H1, 599.6908047 MHz  
DATA PROCESSING  
Sq. sine bell 0.075 sec  
F1 DATA PROCESSING  
Gauss apodization 0.002 sec  
FT size 4096 x 2048  
Total time 1 hr, 19 min

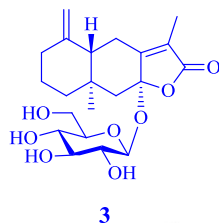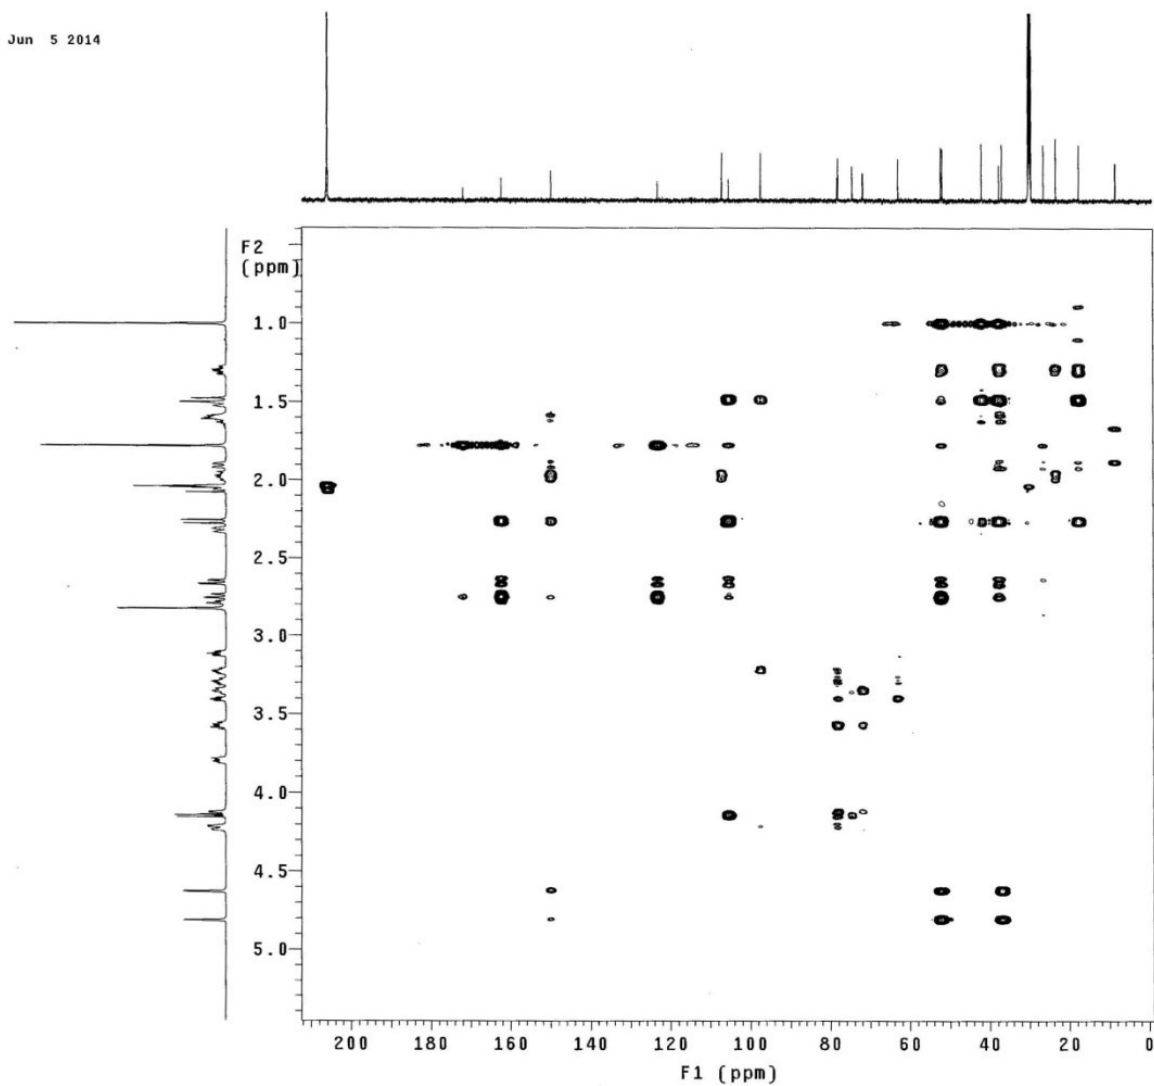

Figure S54. The gHMBC spectrum of compound **3** in acetone- $d_6$  (600 MHz for  $^1\text{H}$ ).

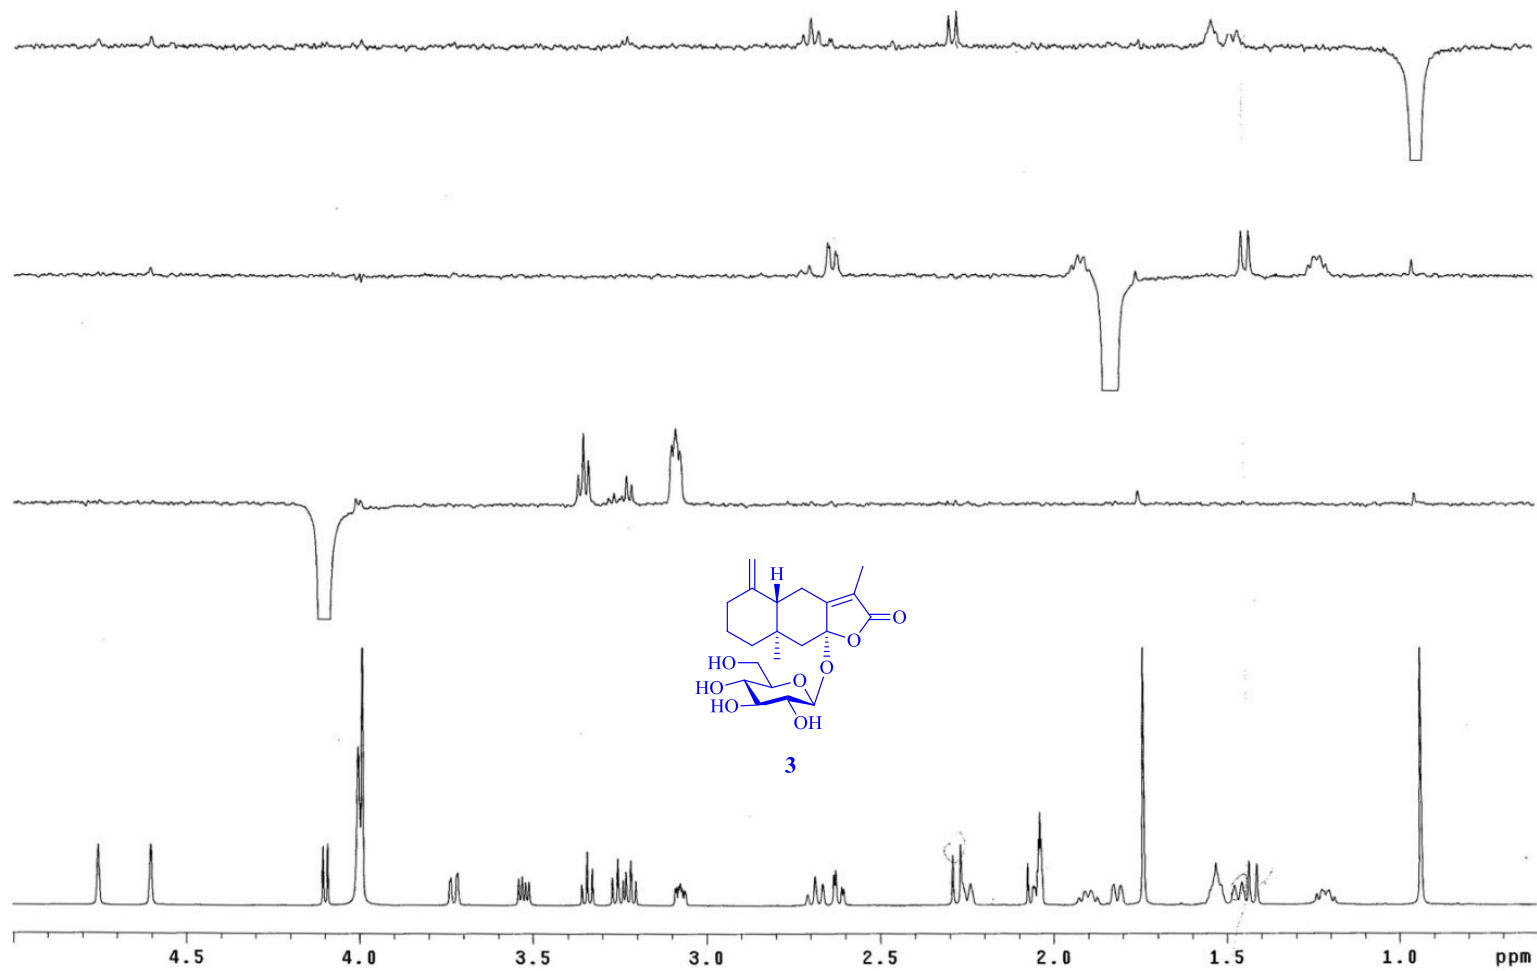

**Figure S55.** The NOE difference spectrum of **3** in acetone-*d*<sub>6</sub> (600 MHz).

Bruker AVIIIHD 600 20141027 DS-135a  
 PROTON Acetone D:\\ DATA2014 3

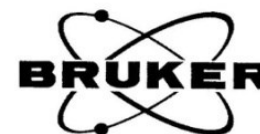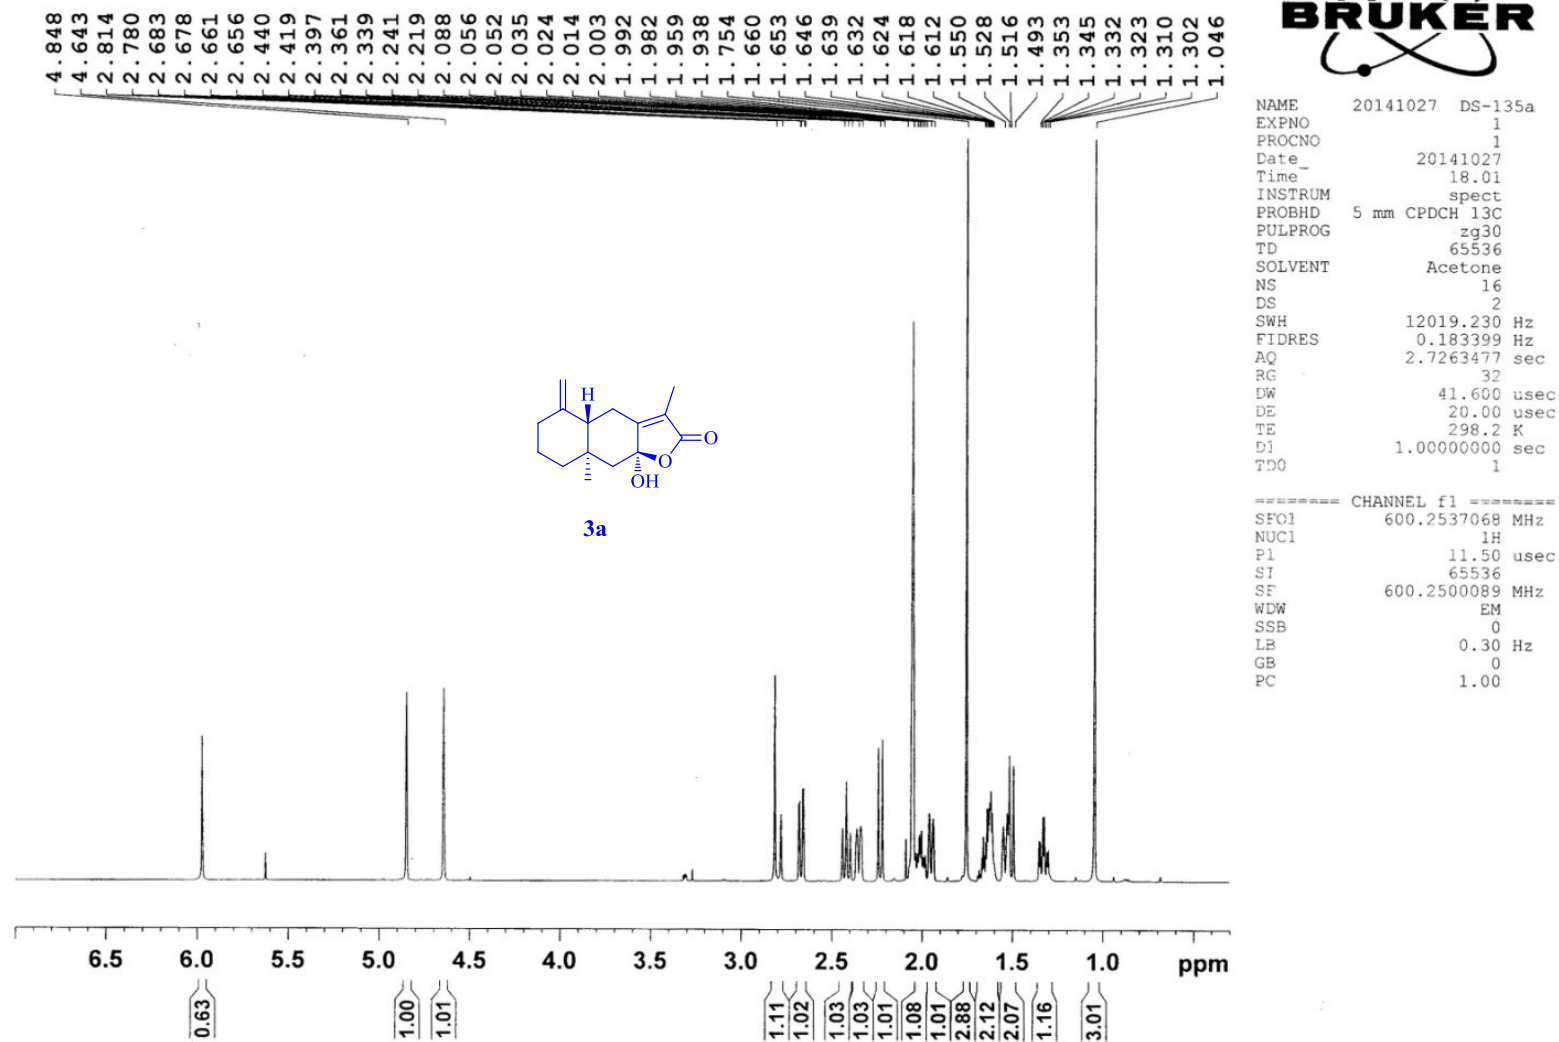

Figure S56. The  $^1\text{H}$  NMR spectrum of the aglycone of **3** in acetone- $d_6$  (600 M).

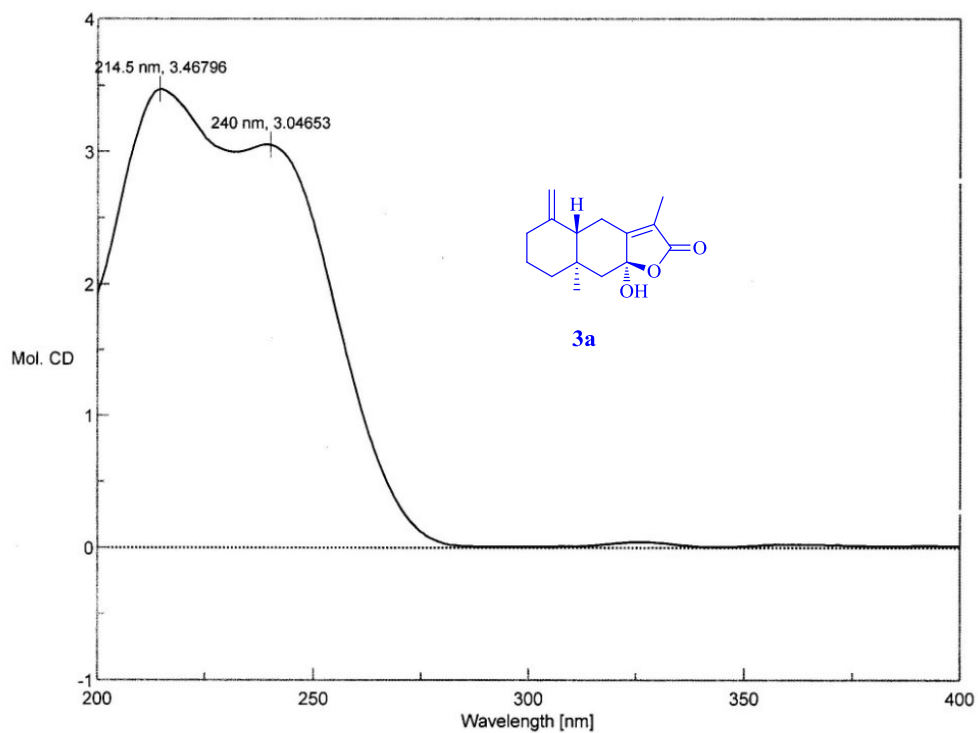

[Comments]  
 Sample name DS-F1  
 Comment  
 User  
 Division  
 Company dell

[Measurement Information]  
 Instrument Name J-815  
 Model Name J-815  
 Serial No. A024461168

Accessory Standard  
 Accessory S/N A024461168  
 Cell Length 1 mm

Photometric Mode CD, HT, Abs  
 Measure Range 400 - 200 nm  
 Data pitch 0.5 nm  
 Sensitivity Standard  
 D.I.T. 2 sec  
 Band width 2.00 nm  
 Start Mode Immediately  
 Scanning Speed 100 nm/min  
 Baseline Correction Baseline  
 Shutter Control Auto  
 PMT Voltage Auto  
 Accumulations 3  
 Solvent MEOH  
 Concentration 0.41 (w/v)%

[Detailed Information]  
 Creation date 2014-5-19 16:07

Data array type Linear data array \* 3  
 Horizontal axis Wavelength [nm]  
 Vertical axis(1) Mol. CD  
 Vertical axis(2) HT [V]  
 Vertical axis(3) Abs  
 Start 400 nm  
 End 200 nm  
 Data interval 0.5 nm  
 Data points 401

**Figure S57.** The CD spectrum of the aglycone of **3** in MeOH.

Bruker AVIIIHD 600 20141027 DS-135G  
PROTON D2O D:\ DATA2014 2

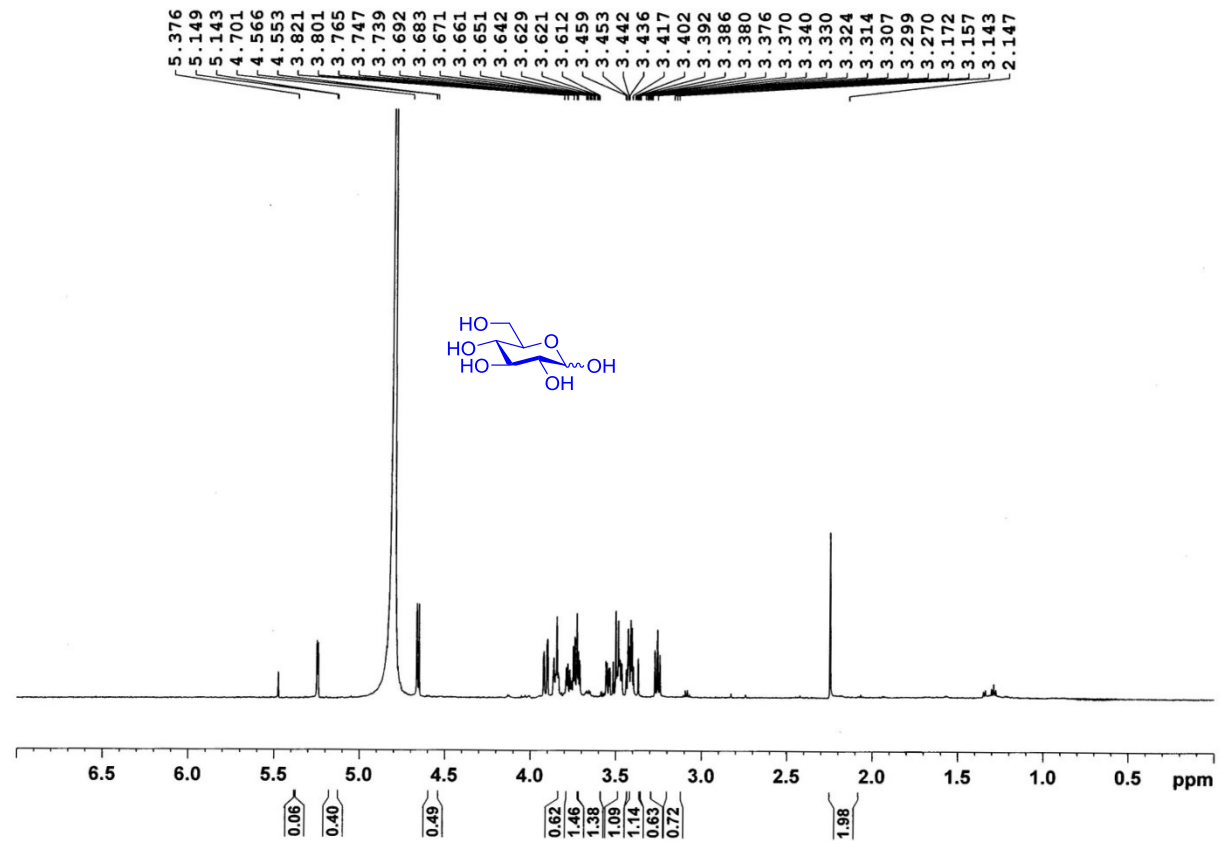

Figure S58. The <sup>1</sup>H NMR spectrum of D-glucose isolated from the hydrolysate of **3** in D<sub>2</sub>O (600 M).



Bruker AVIIIHD 600 20141017 DS-D-Glu  
PROTON D2O D:\\ DATA2014 22

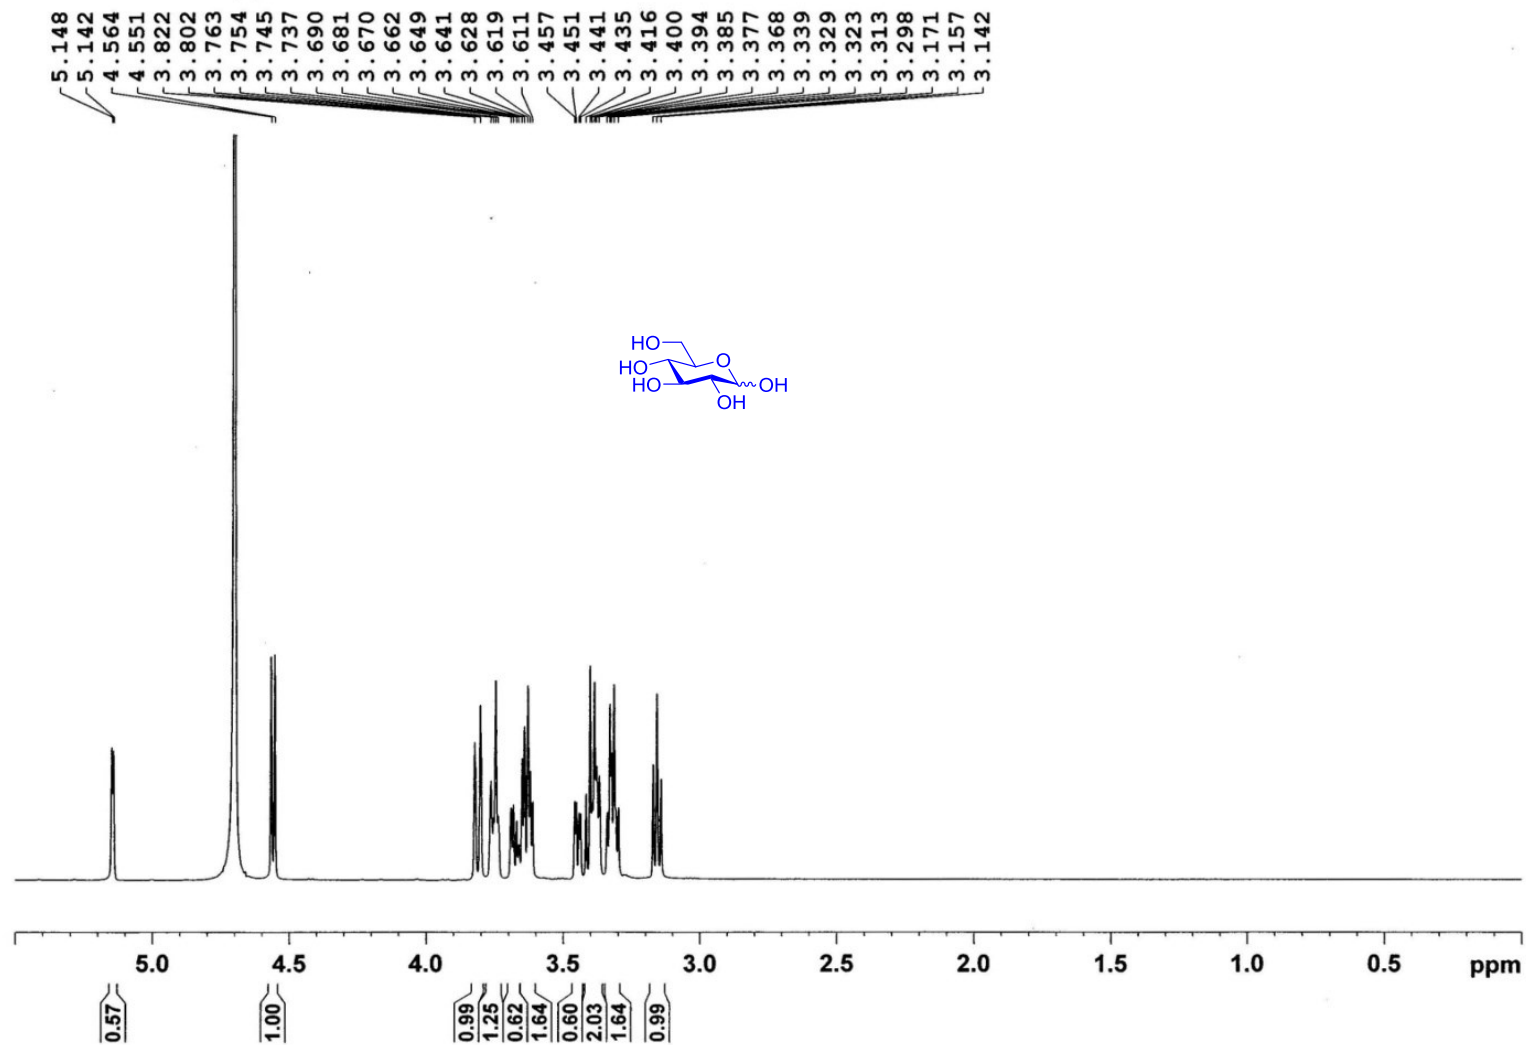

Figure S59. The  $^1\text{H}$  NMR spectrum of the authentic D-glucose in  $\text{D}_2\text{O}$  (600 M).
